# Supplementary material
Source: PubMed Central journal article supplement (PMC3915775)
Supplement: NIHMS535773-supplement-Supporting_Information.pdf [file NIHMS535773-supplement-Supporting_Information.pdf]

*Supporting Information*

*For*

**Synthesis of a Comprehensive Polyprenol  
Library for Evaluation of Bacterial Enzyme  
Lipid Substrate Specificity**

*Baolin Wu,<sup>1,3</sup> Robert Woodward,<sup>2,3</sup> Liuqing Wen,<sup>1</sup> Xuan Wang,<sup>1</sup> Guohui Zhao,<sup>1</sup> Peng George Wang<sup>1\*</sup>*

<sup>1</sup>The Center for Therapeutics and Diagnostics (CDT), Department of Chemistry, Georgia State University, Atlanta, GA 30303.

<sup>2</sup> Department of Chemistry and Biochemistry, University of Mount Union, Alliance, OH 44601

<sup>3</sup> These authors contribute to this work equally

Corresponding author: [pwang11@gsu.edu](mailto:pwang11@gsu.edu); Tel: 404-413-3591, Fax: 404-413-3580

## Table of Content

| Compound #  | NMR Spectra  |
|-------------|--------------|
| Compound 2  | P 3,4        |
| Compound 4  | P 5, 6       |
| Compound 6  | P 7, 8       |
| Compound 7  | P 9, 10      |
| Compound 8  | P 11, 12     |
| Compound 9  | P 13, 14     |
| Compound 10 | P 15, 16     |
| Compound 12 | P 17, 18     |
| Compound 14 | P 19, 20     |
| Compound 15 | P 21, 22     |
| Compound 16 | P 23, 24     |
| Compound 18 | P 25, 26     |
| Compound 20 | P 27, 28     |
| Compound 22 | P 29, 30     |
| Compound 24 | P 31, 32     |
| Compound 25 | P 33, 34     |
| Compound 26 | P 35, 36     |
| Compound 27 | P 37, 38     |
| Compound 28 | P 39, 40     |
| Compound 29 | P 41, 42     |
| Compound 30 | P 43, 44     |
| Compound 31 | P 45, 46, 47 |
| Compound 32 | P 48, 49, 50 |
| Compound 33 | P 51, 52, 53 |
| Compound 34 | P 54, 55, 56 |
| Compound 35 | P 57, 58, 59 |
| Compound 36 | P 60, 61, 62 |

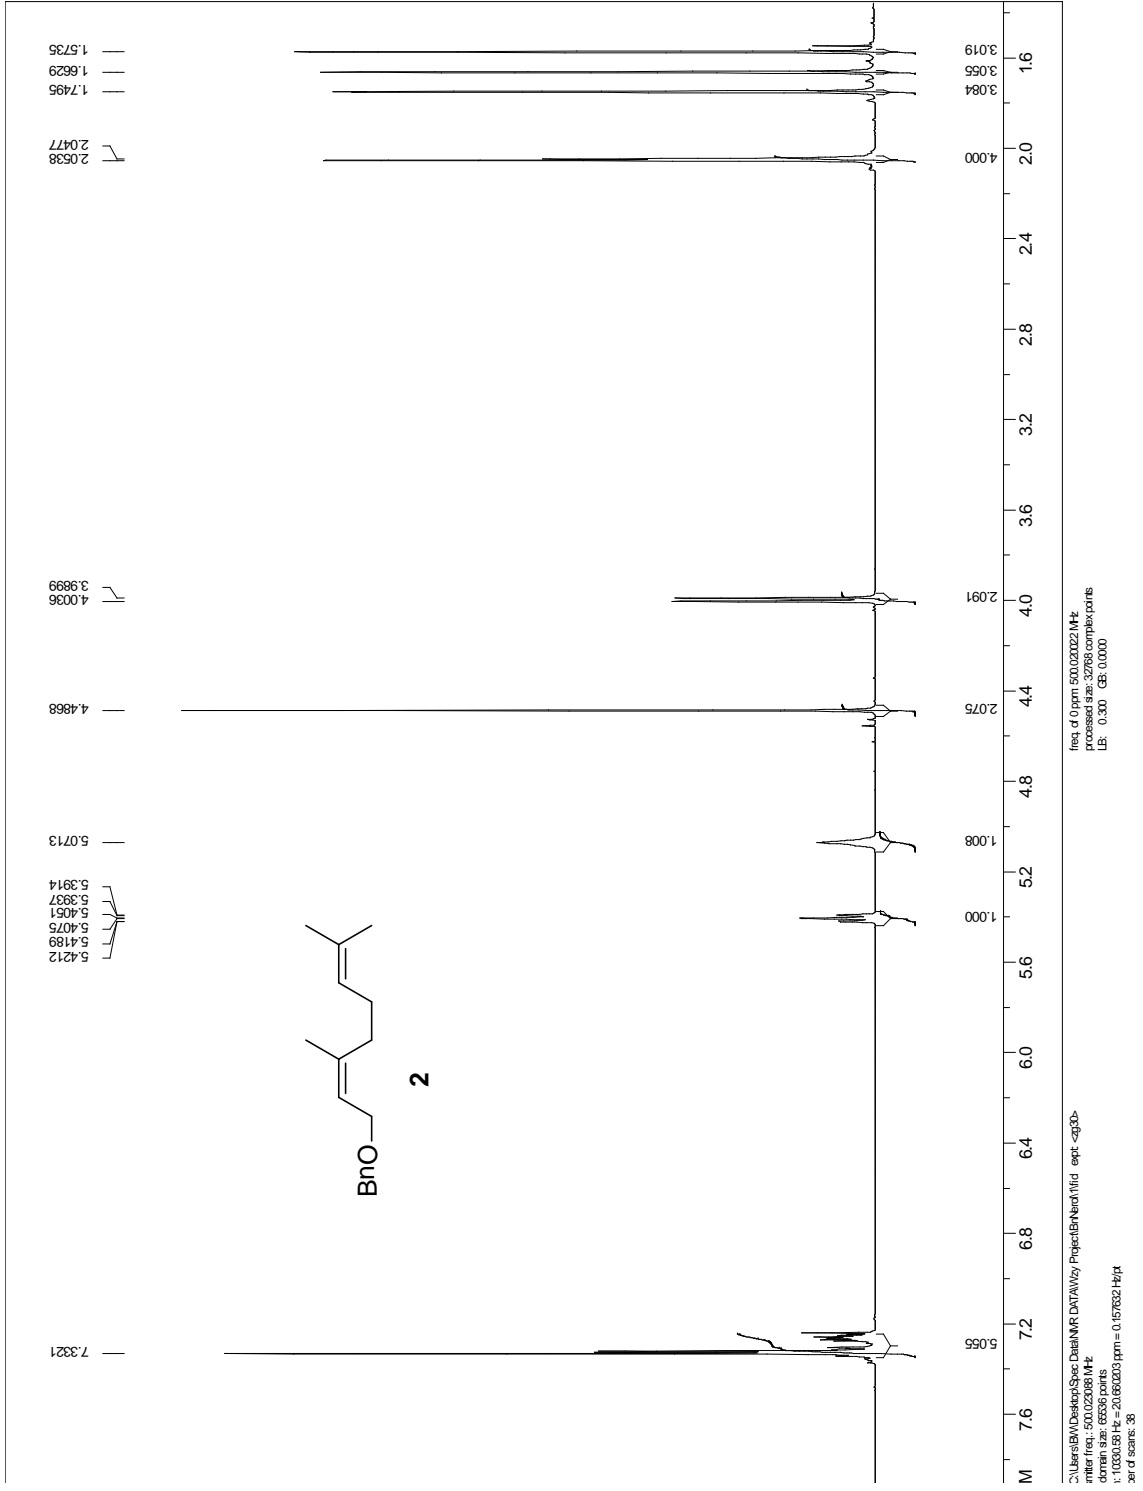

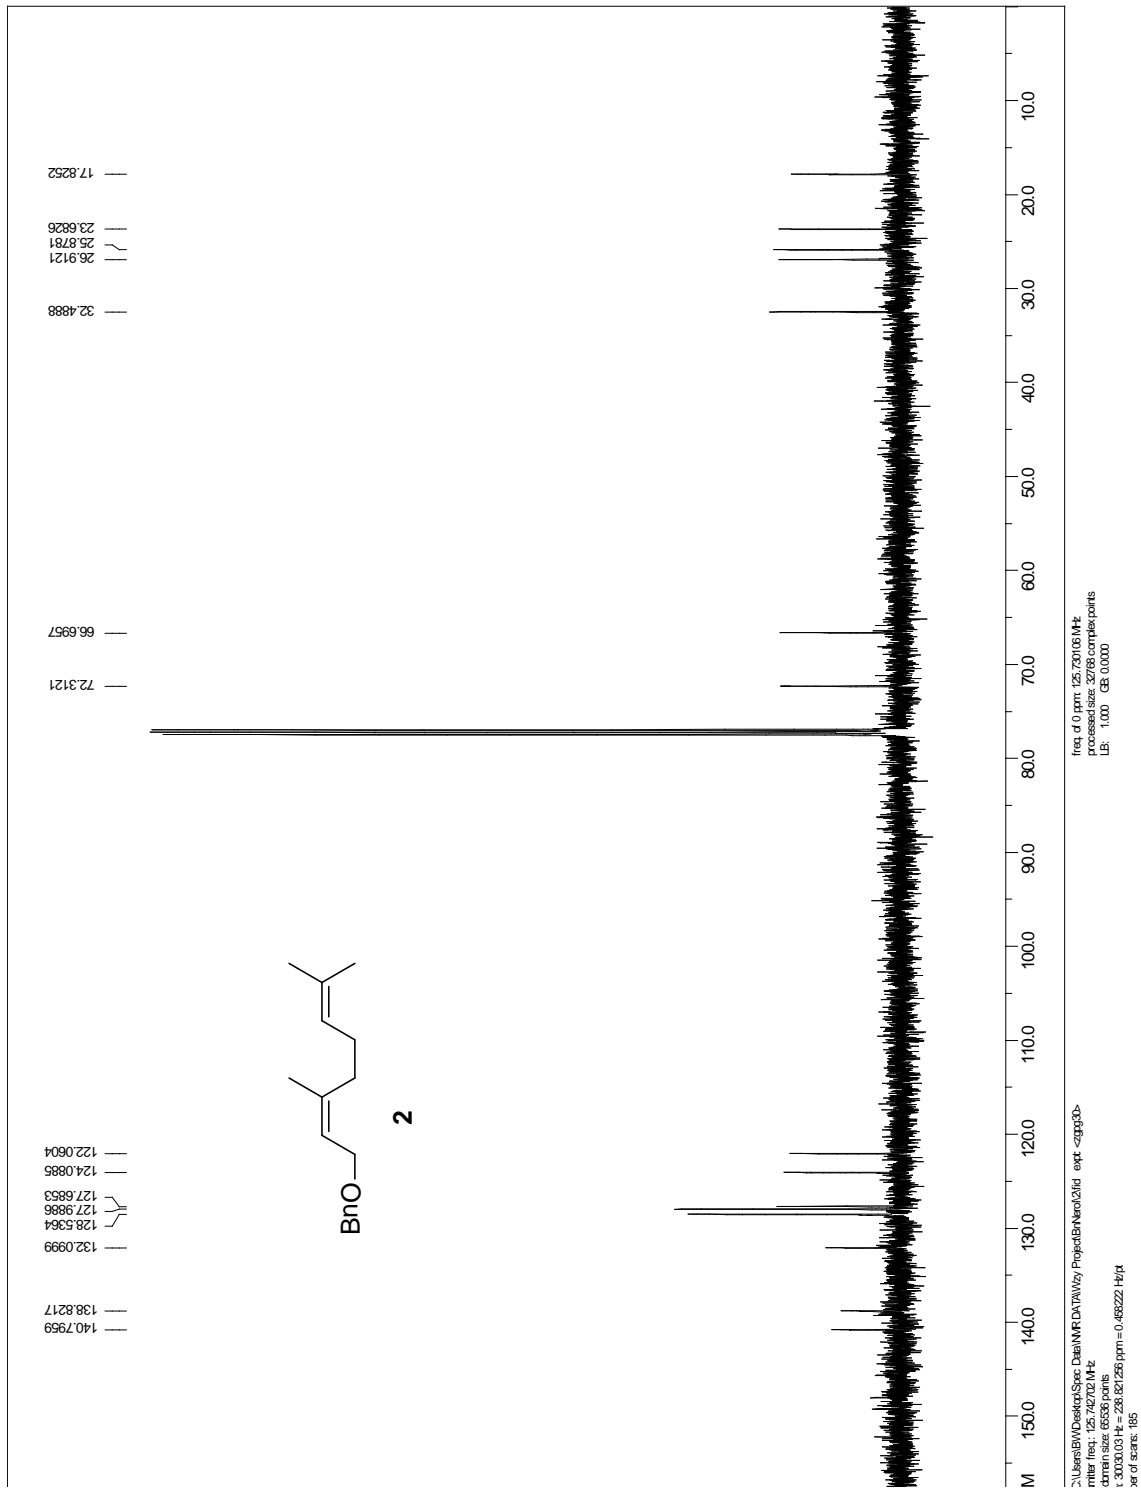

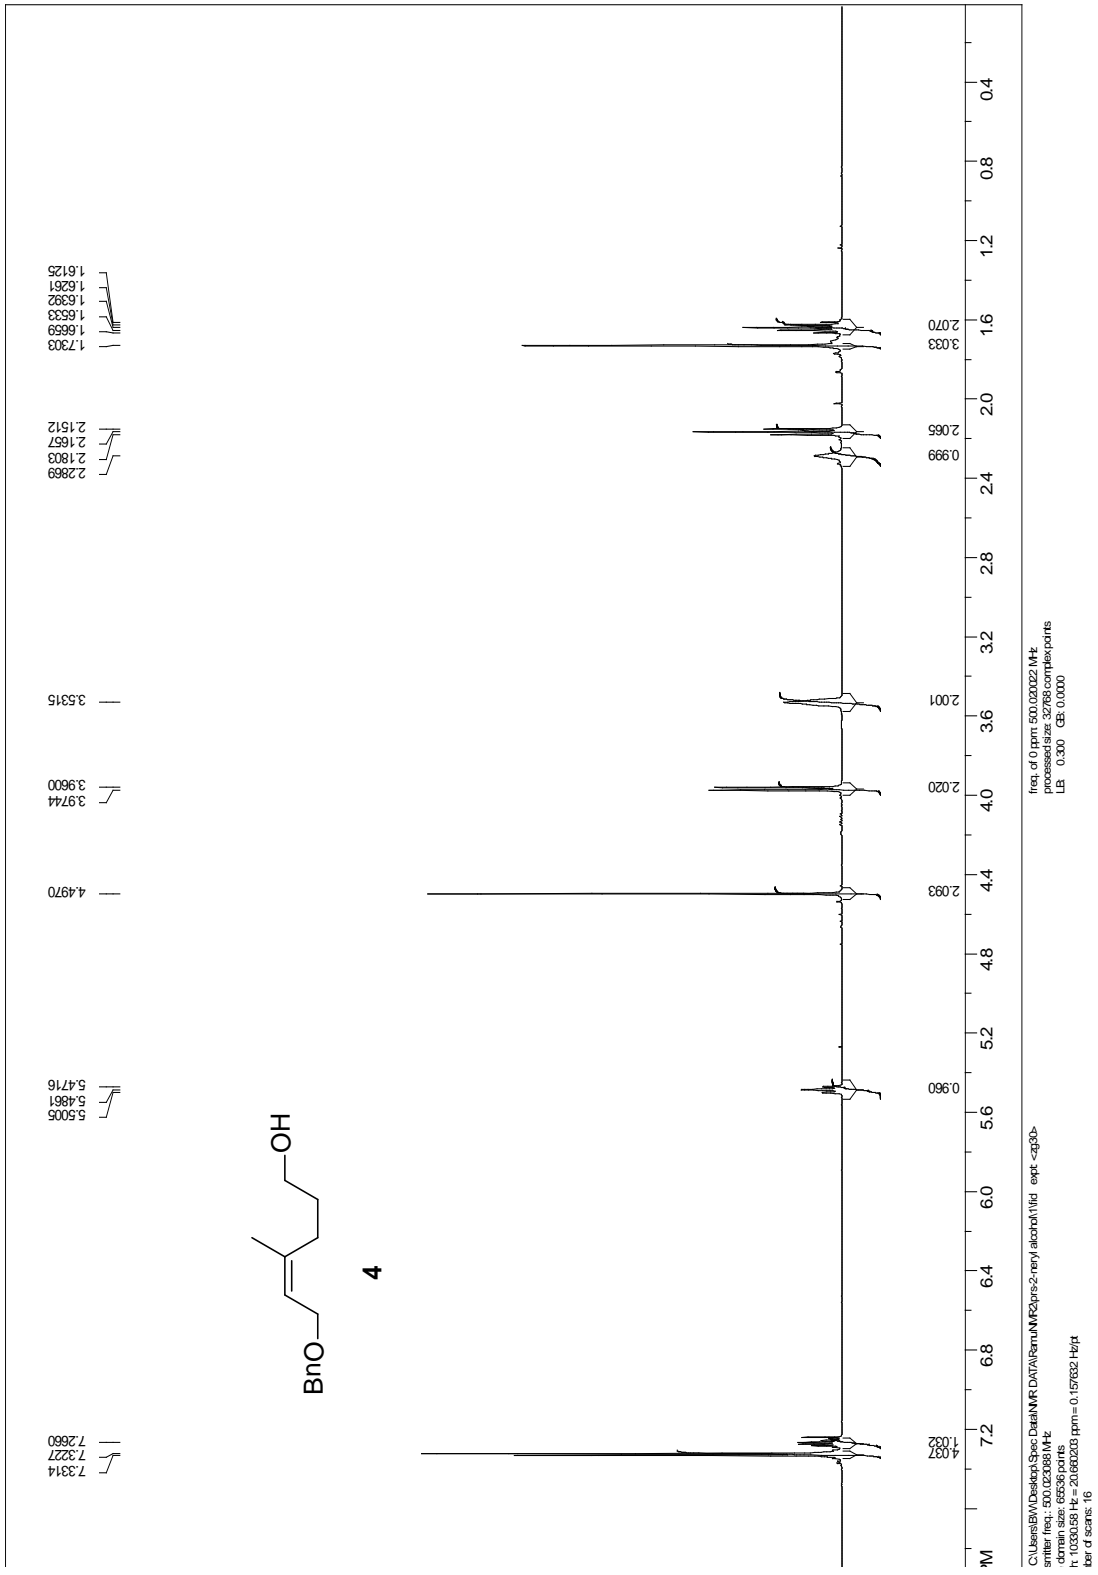

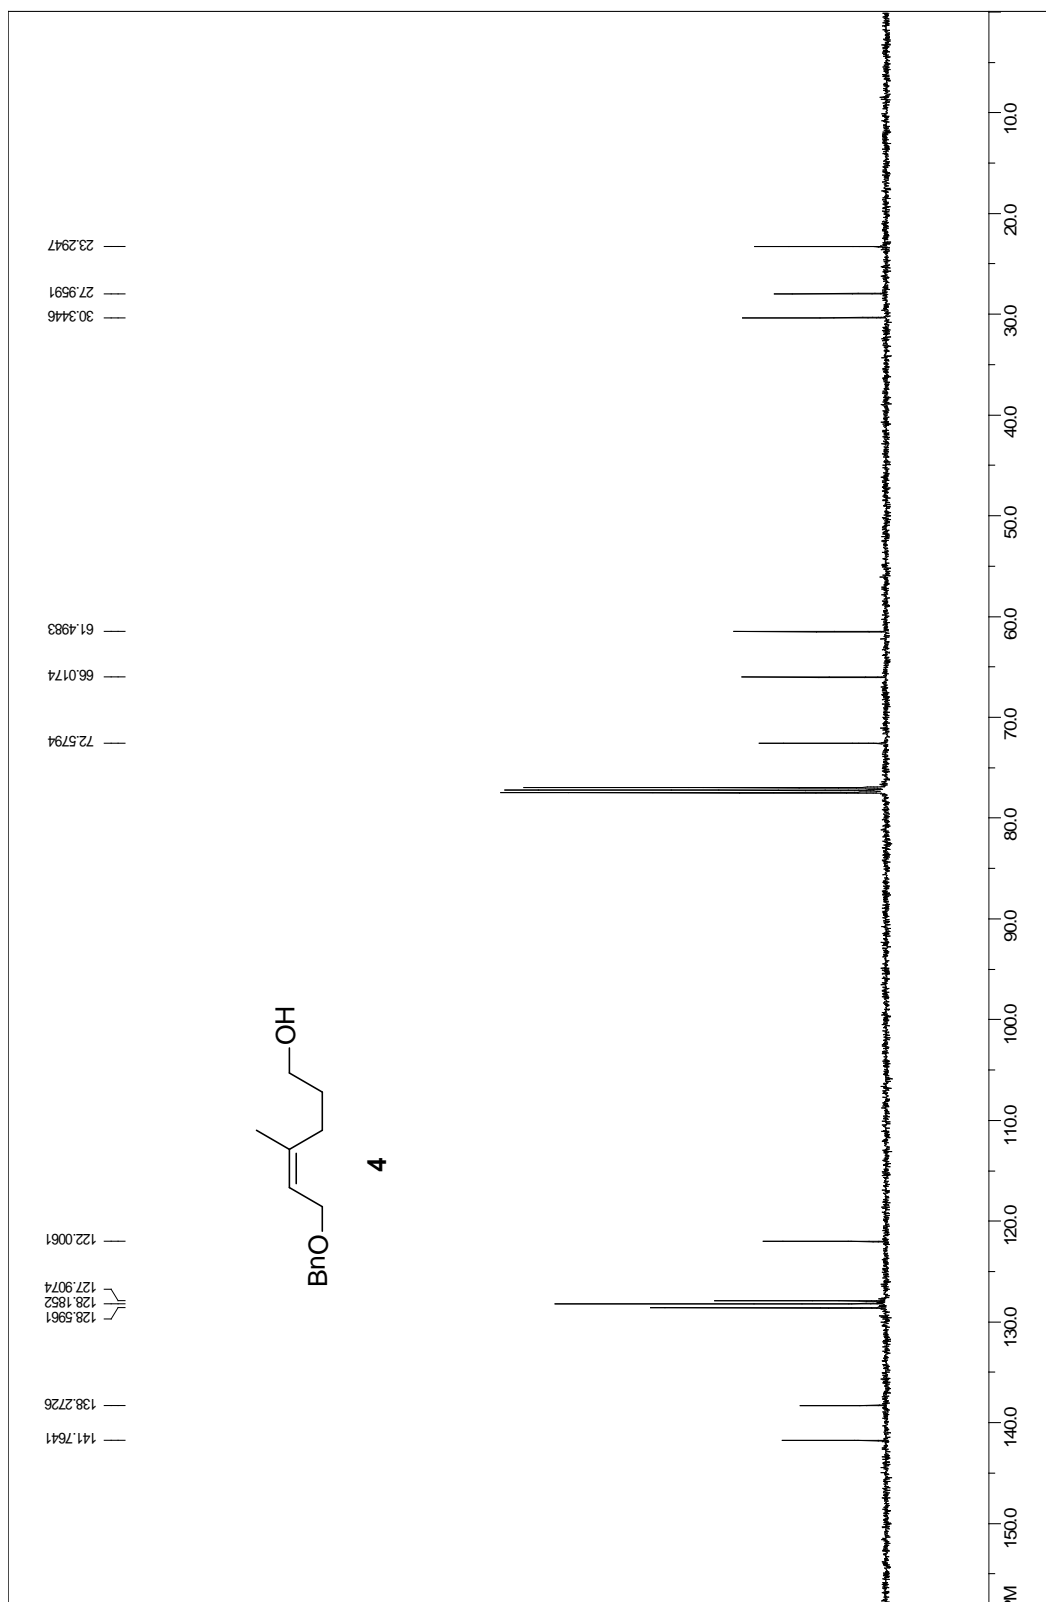

C:\Users\BMD\Desktop\Spec Data\NMR\DATA\Remu\NMR2\ps-2-nyl alcohol2\1d1 exp1 -<3>g30-  
 smiler freq: 125.742702 MHz  
 domain size: 65536 points  
 x: 30000.00 Hz = 238.827259 ppm = 0.456222 Hqpt  
 bar of scans: 145  
 freq: 0.0 ppm 125.730706 MHz  
 processed size: 32768 complex points  
 LB: 1.000 GB: 0.0000

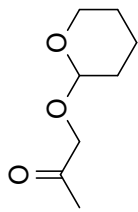

6

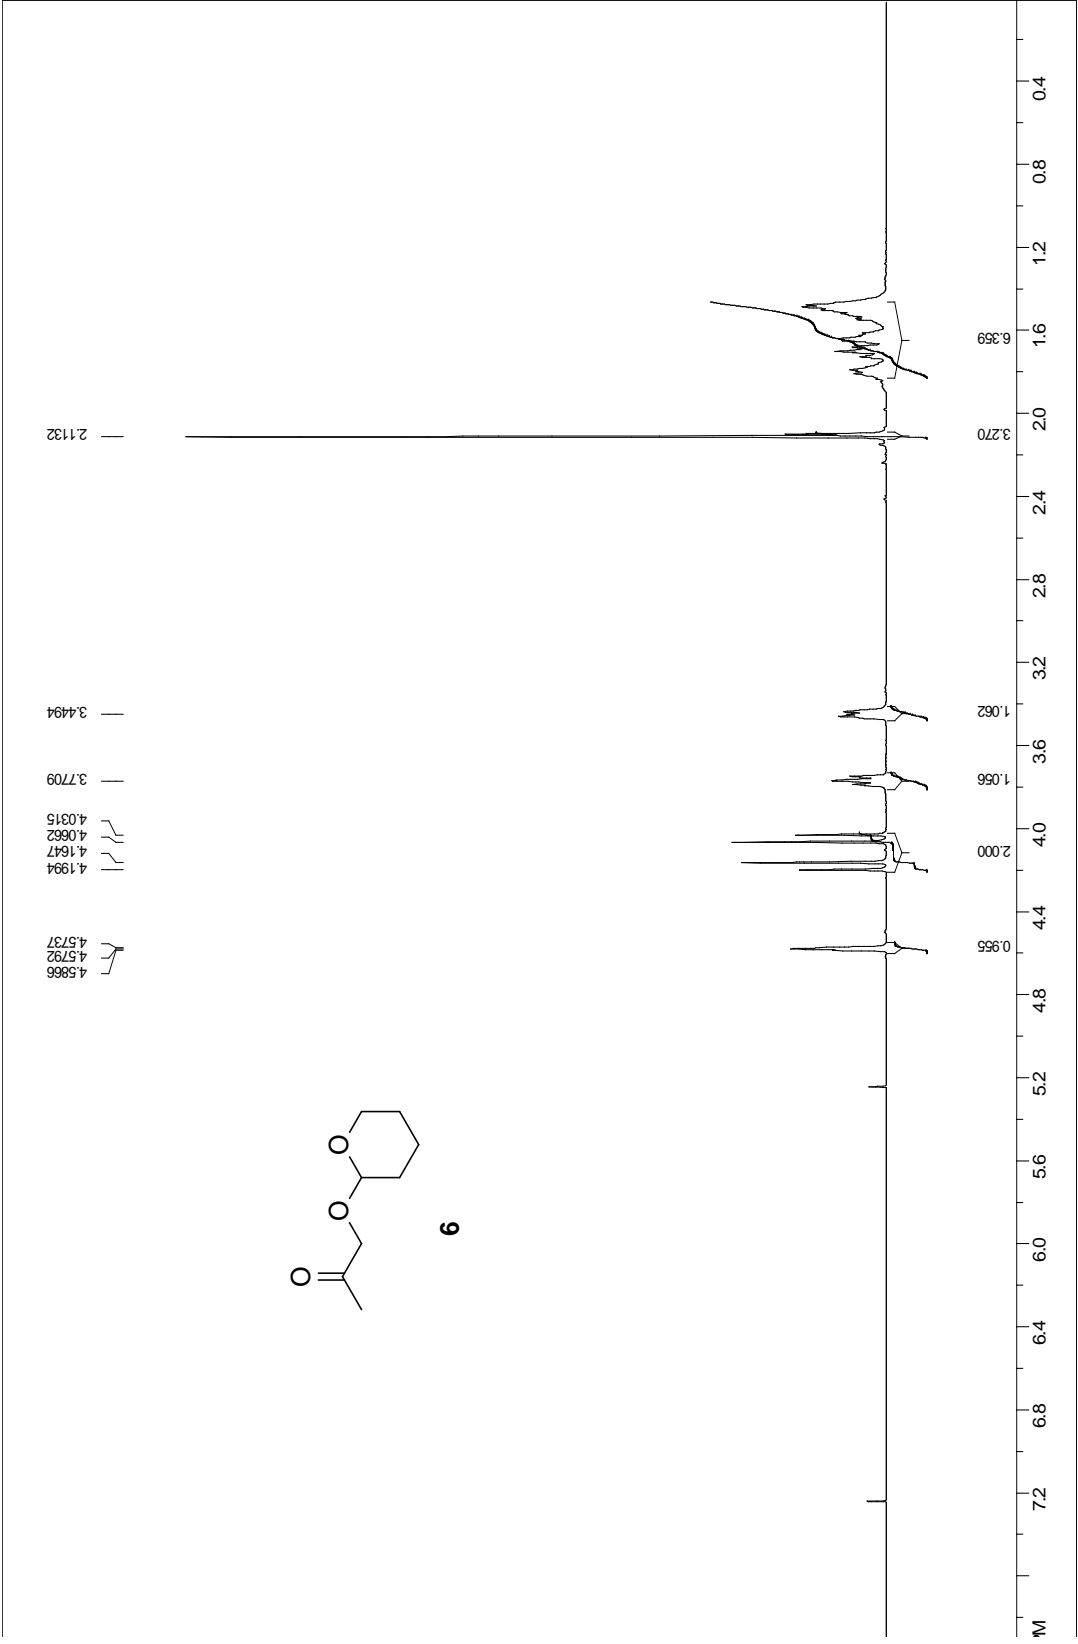

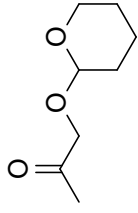

**6**

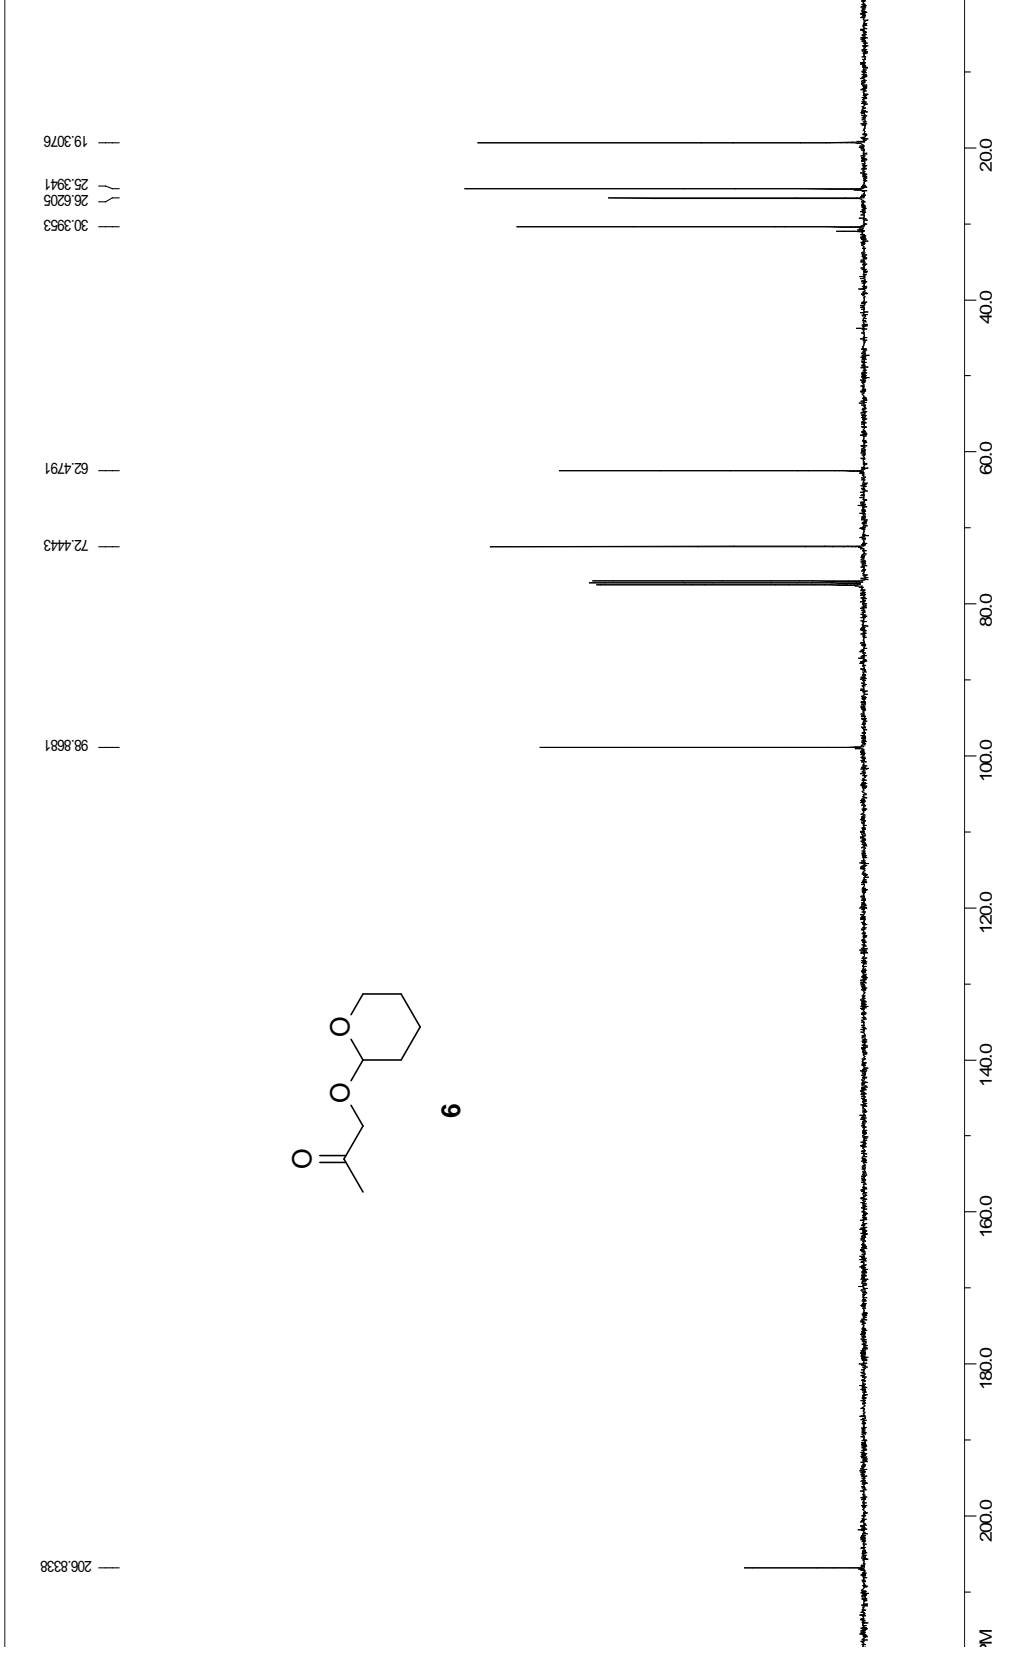

freq. of 0 ppm: 125.730110 MHz  
 name: CDCl<sub>3</sub> sample: panis  
 LB: 1.000 GB: 0.0000

C:\Users\B\W\Desktop\Spec Data\NMR\DATA\pani\NMR2\ps-THP-hydroxy acetone\cdcl3\ exp1 <aggsg>  
 f2: 125.760 MHz  
 channel size: 66536 points  
 h: 300.0000 Hz = 238.821256 ppm = 0.458222 Hz/pt  
 no. of scans: 143



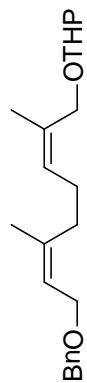

7

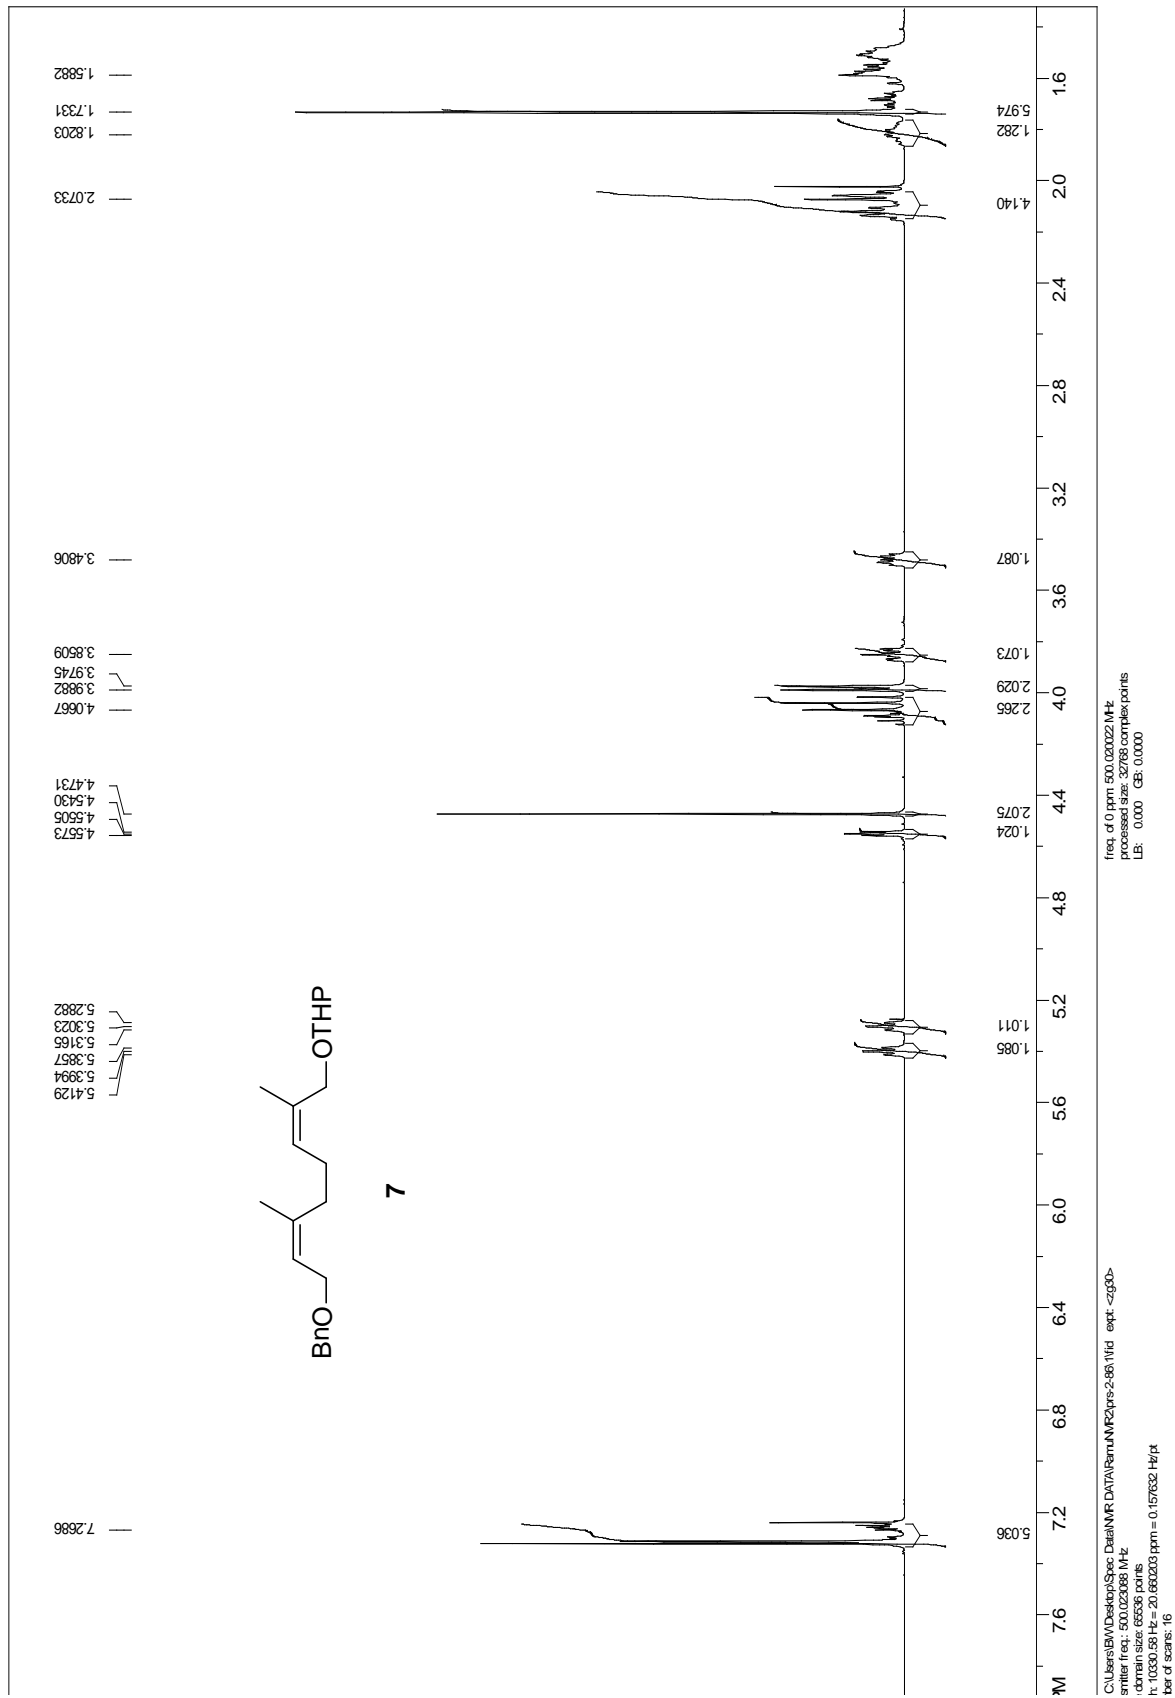

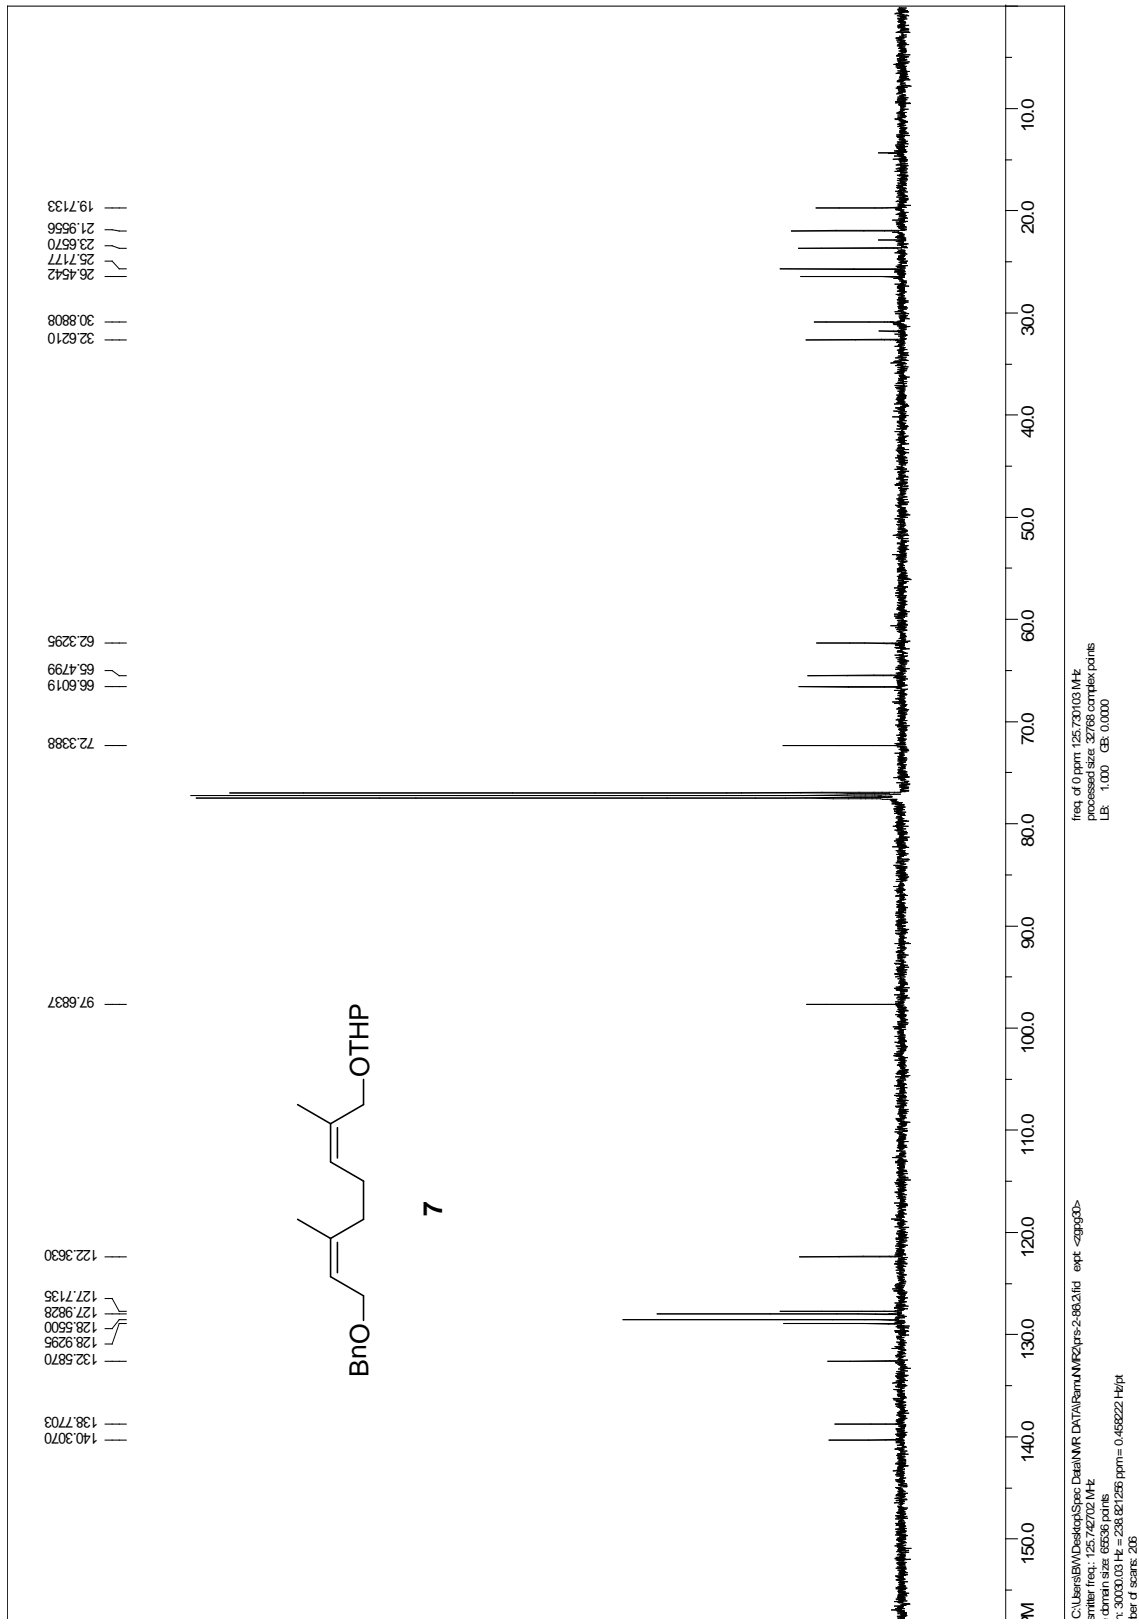

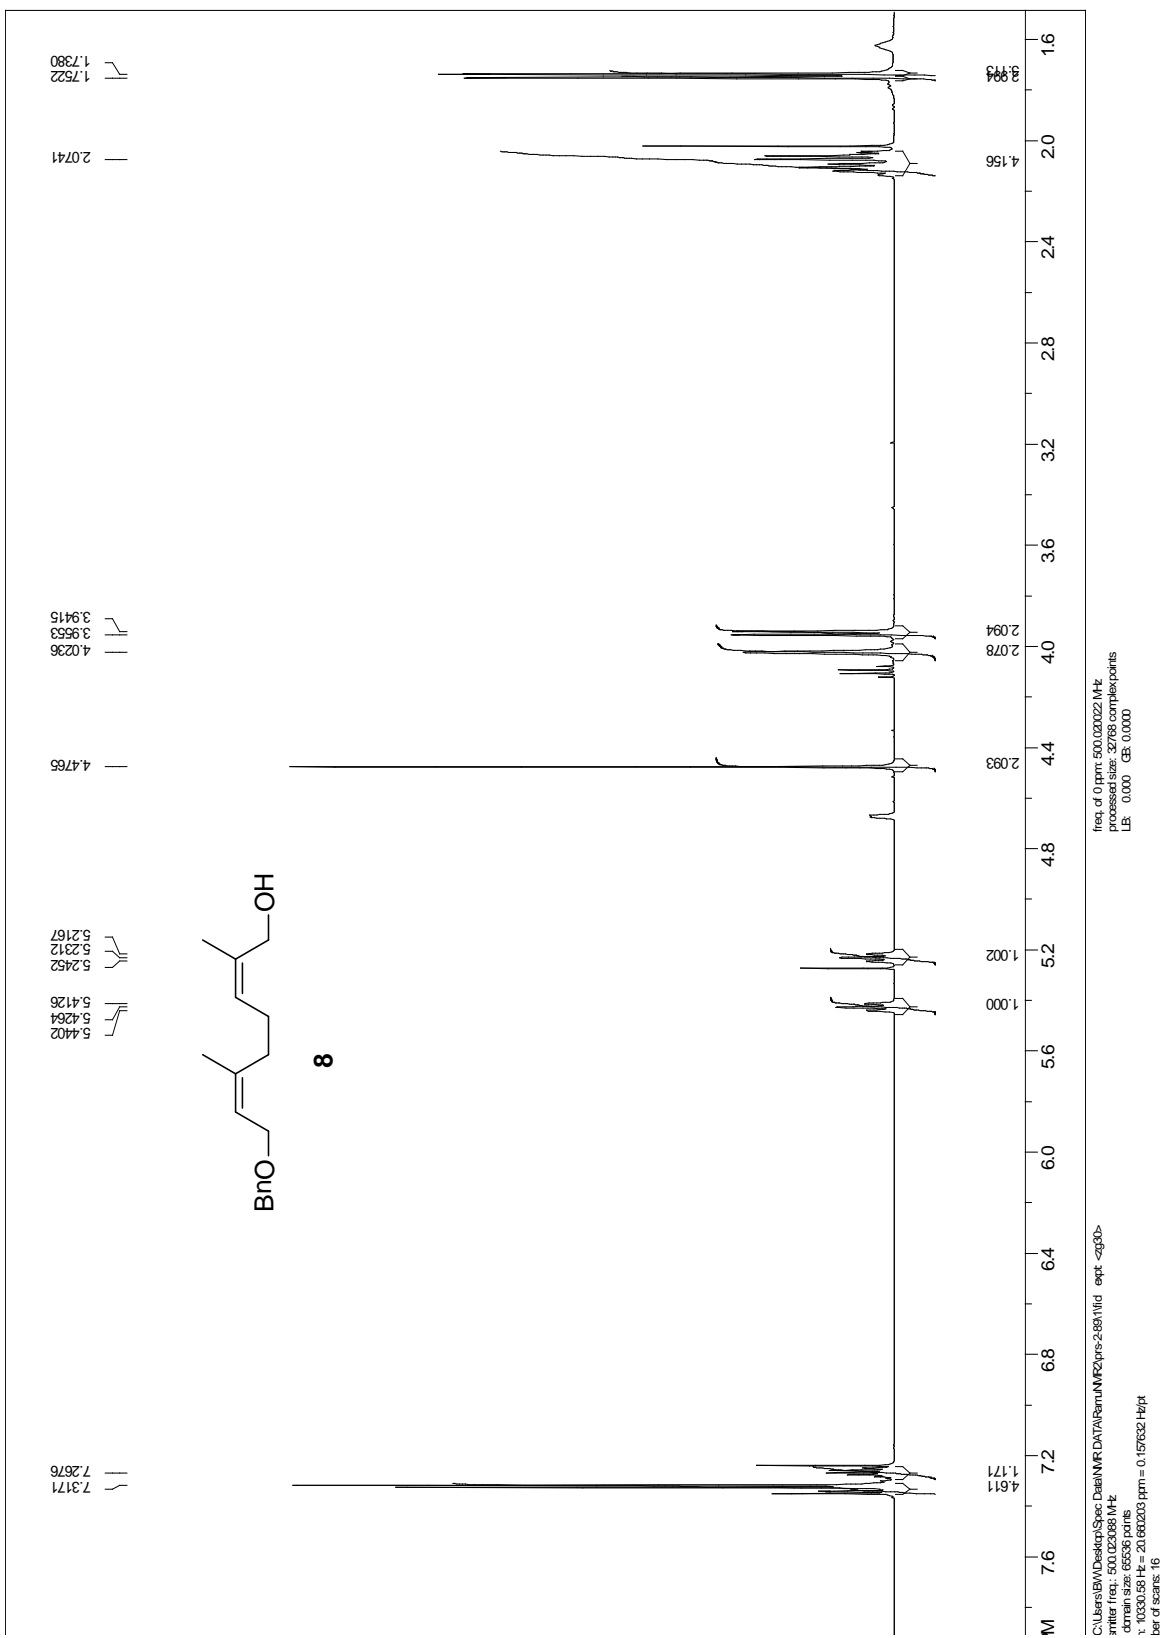

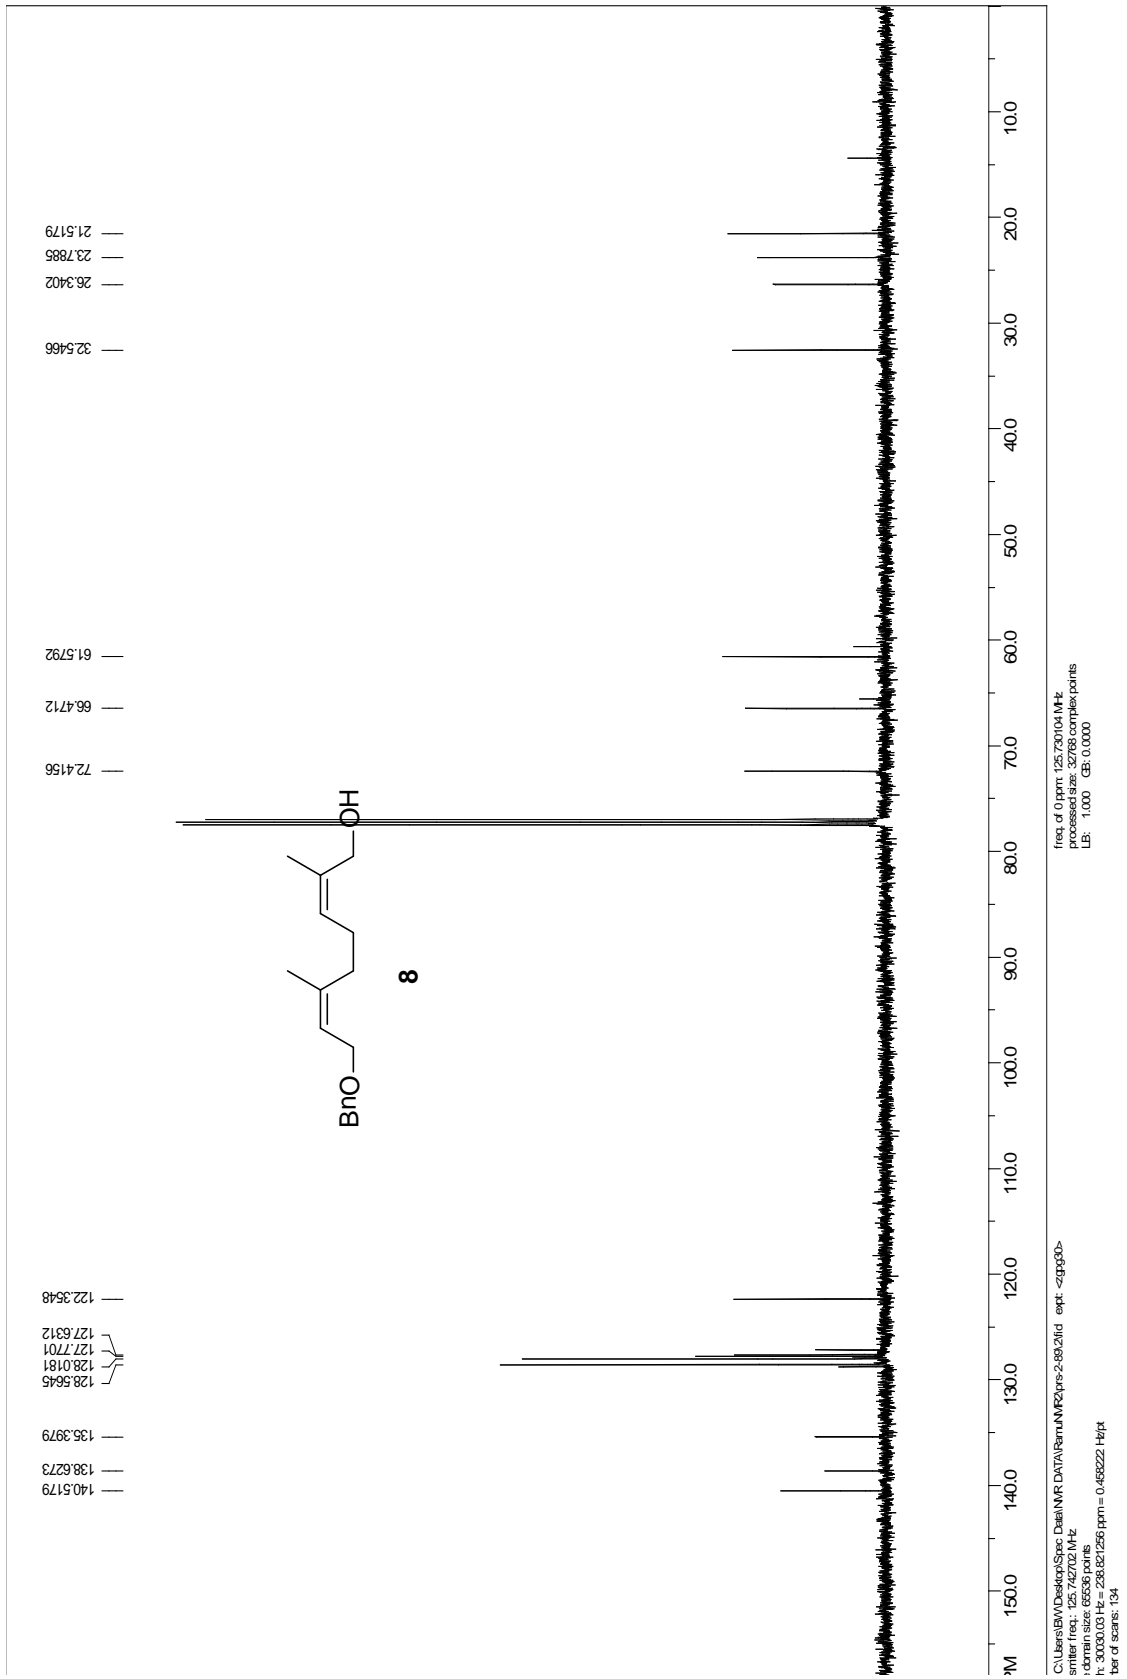

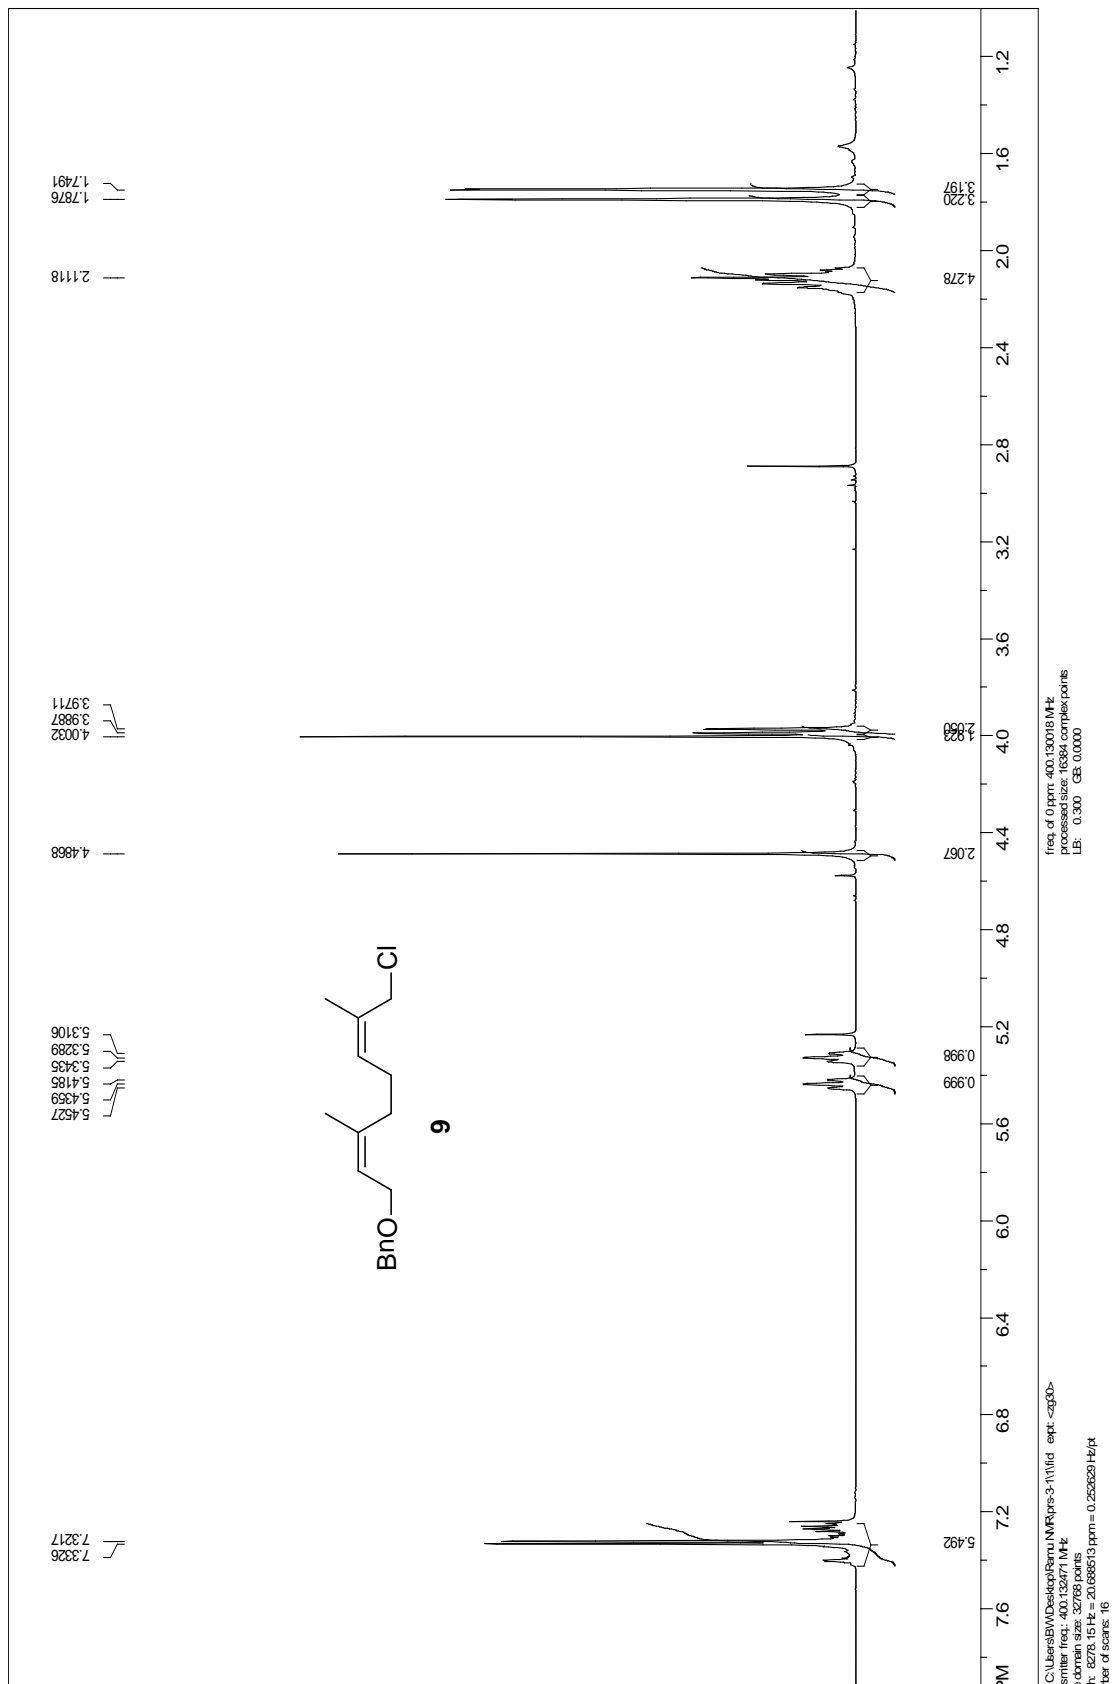

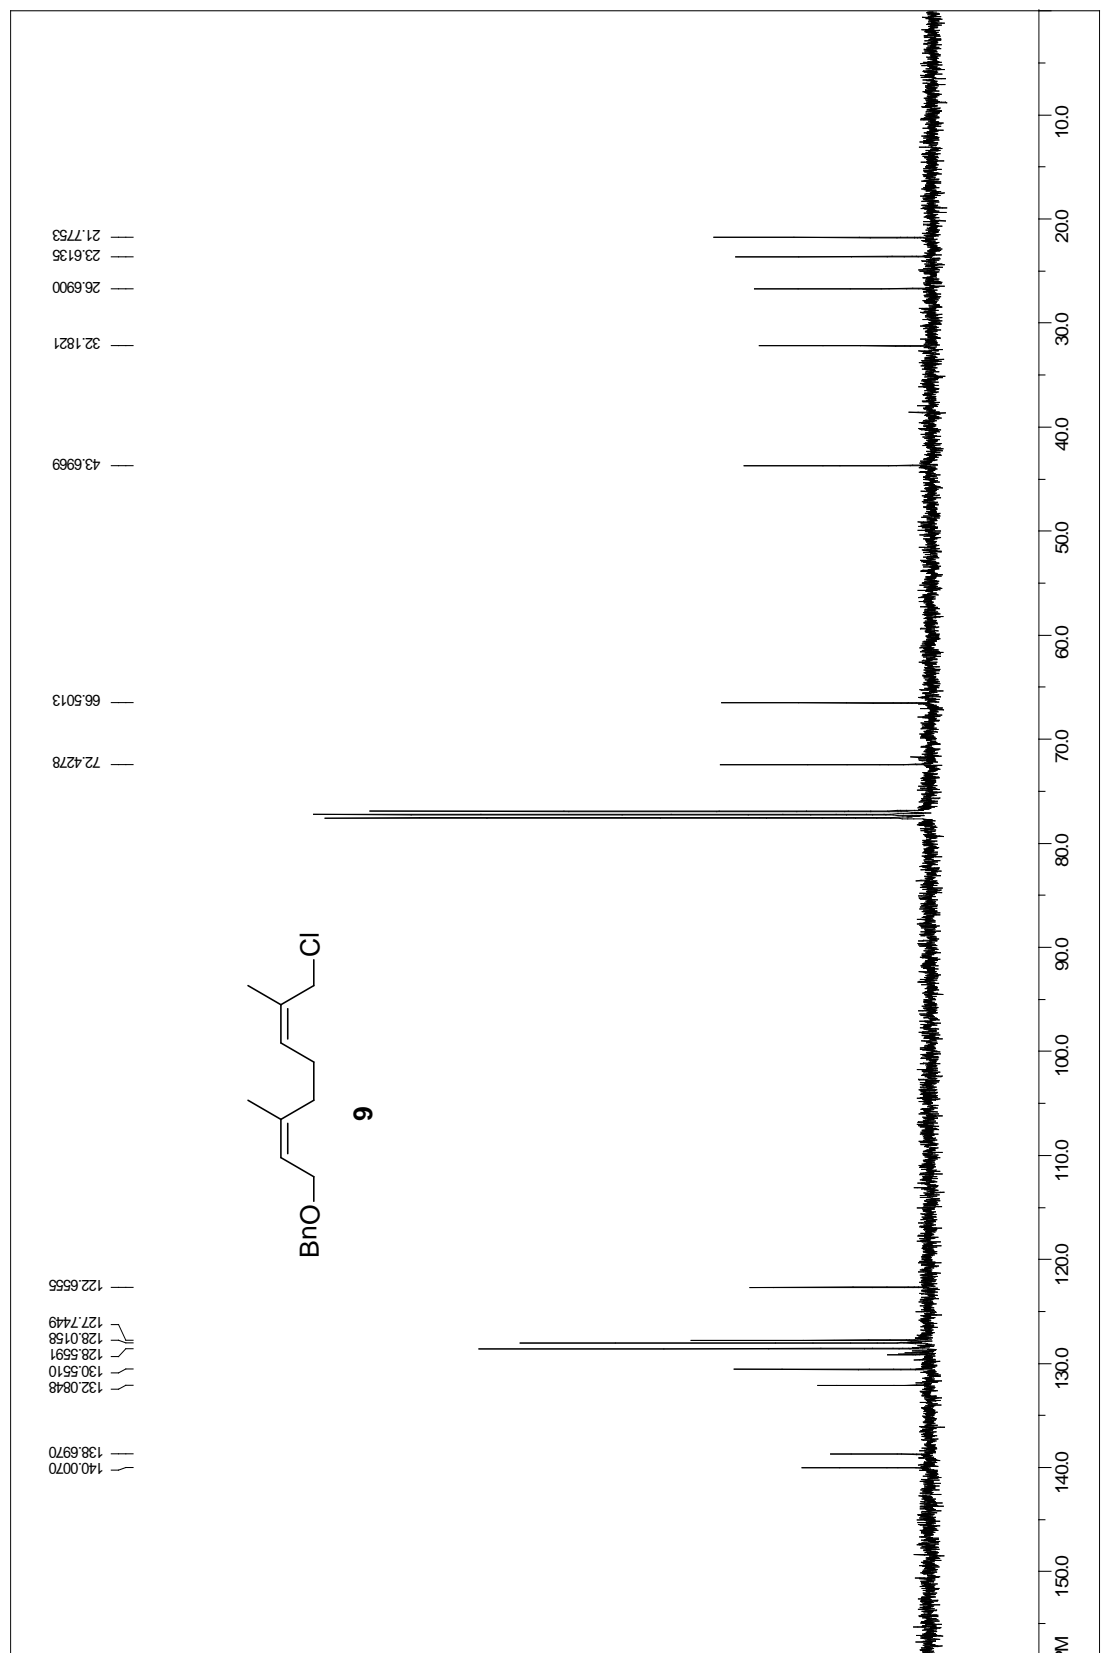

Trace of 0 ppm: 100.612749 MHz  
 processed size: 32768 complex points  
 LS: 1.00 GB 0.0000

C:\Users\BMD\Desktop\Bamu\NMR\ps-5\12\fid exp1 ->psg00-  
 antifer freq: 100.622830 MHz  
 acq time: 14.25000000 ppm  
 23000 Hz 230.00000000 ppm = 0.368918 Hz  
 bot of scans: 137

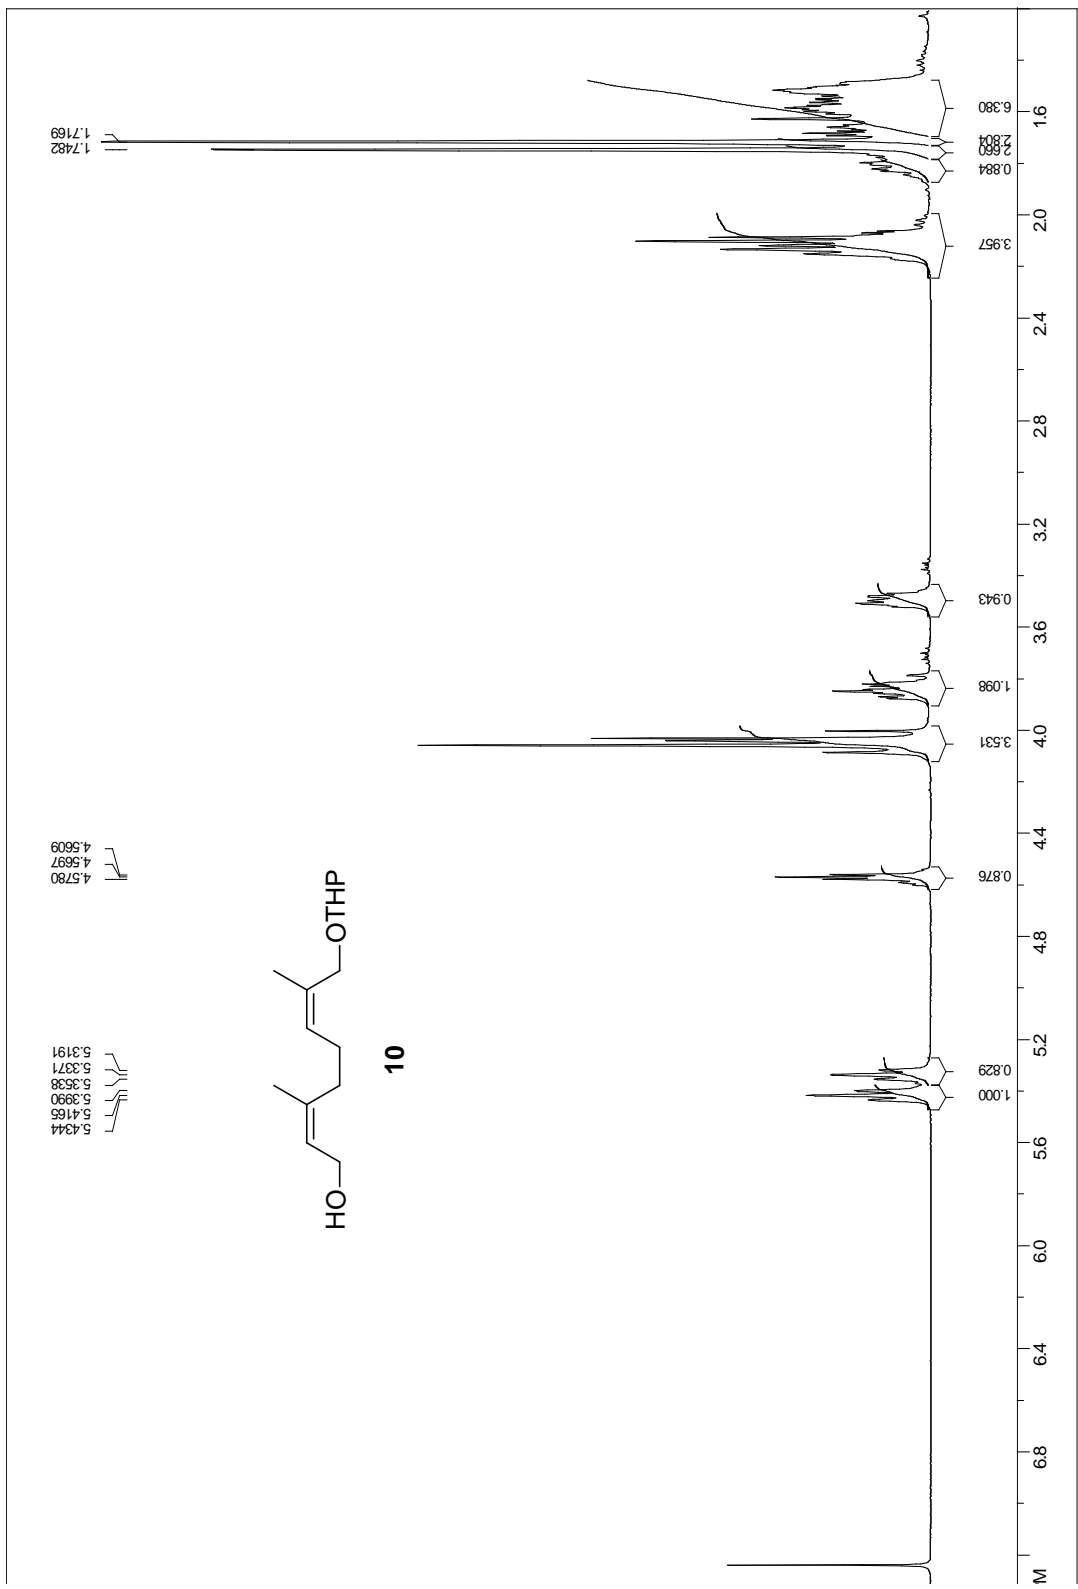

C:\Users\BM\Desktop\item\NMR\ps-3-1\fid exp-0360-  
 acq1.fid: 400.132671 MHz  
 domain size: 32768 points  
 40978.15114-20.000015 ppm - 0.25262946 pt  
 box of scans: 16

freq. of 0 ppm: 400.130018 MHz  
 processed size: 16384 complex points  
 LB: 0.000 GB: 0.0000

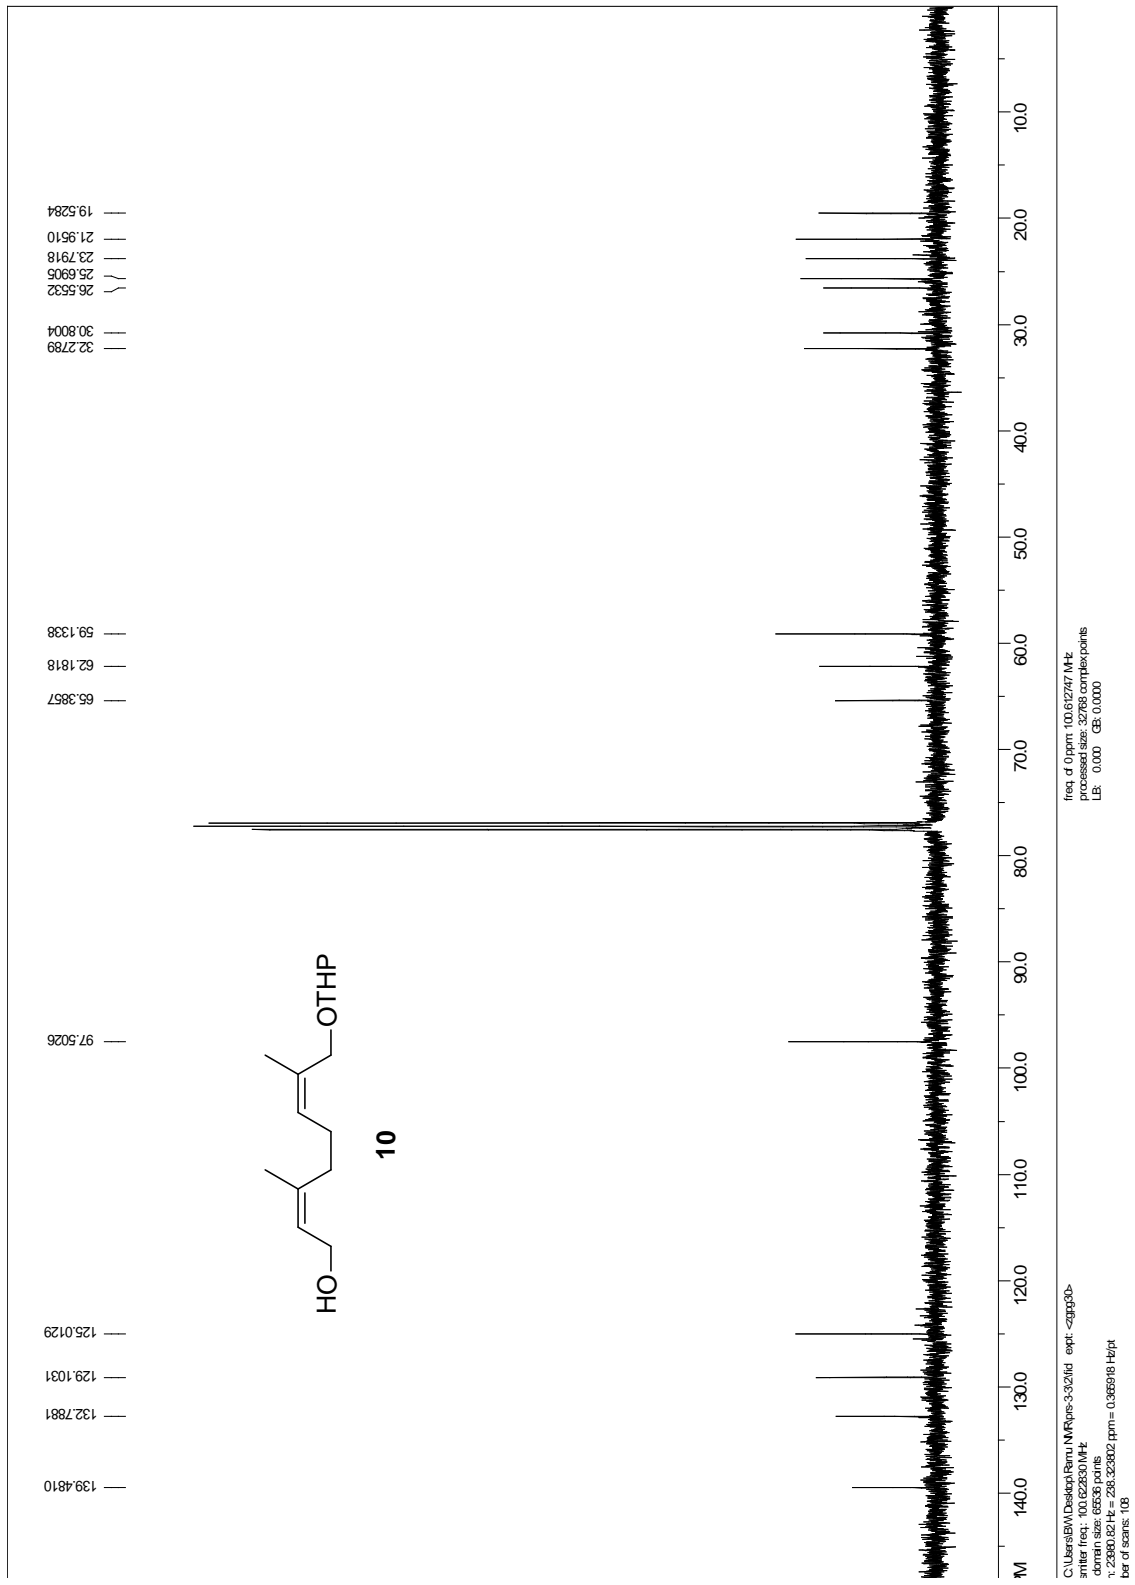



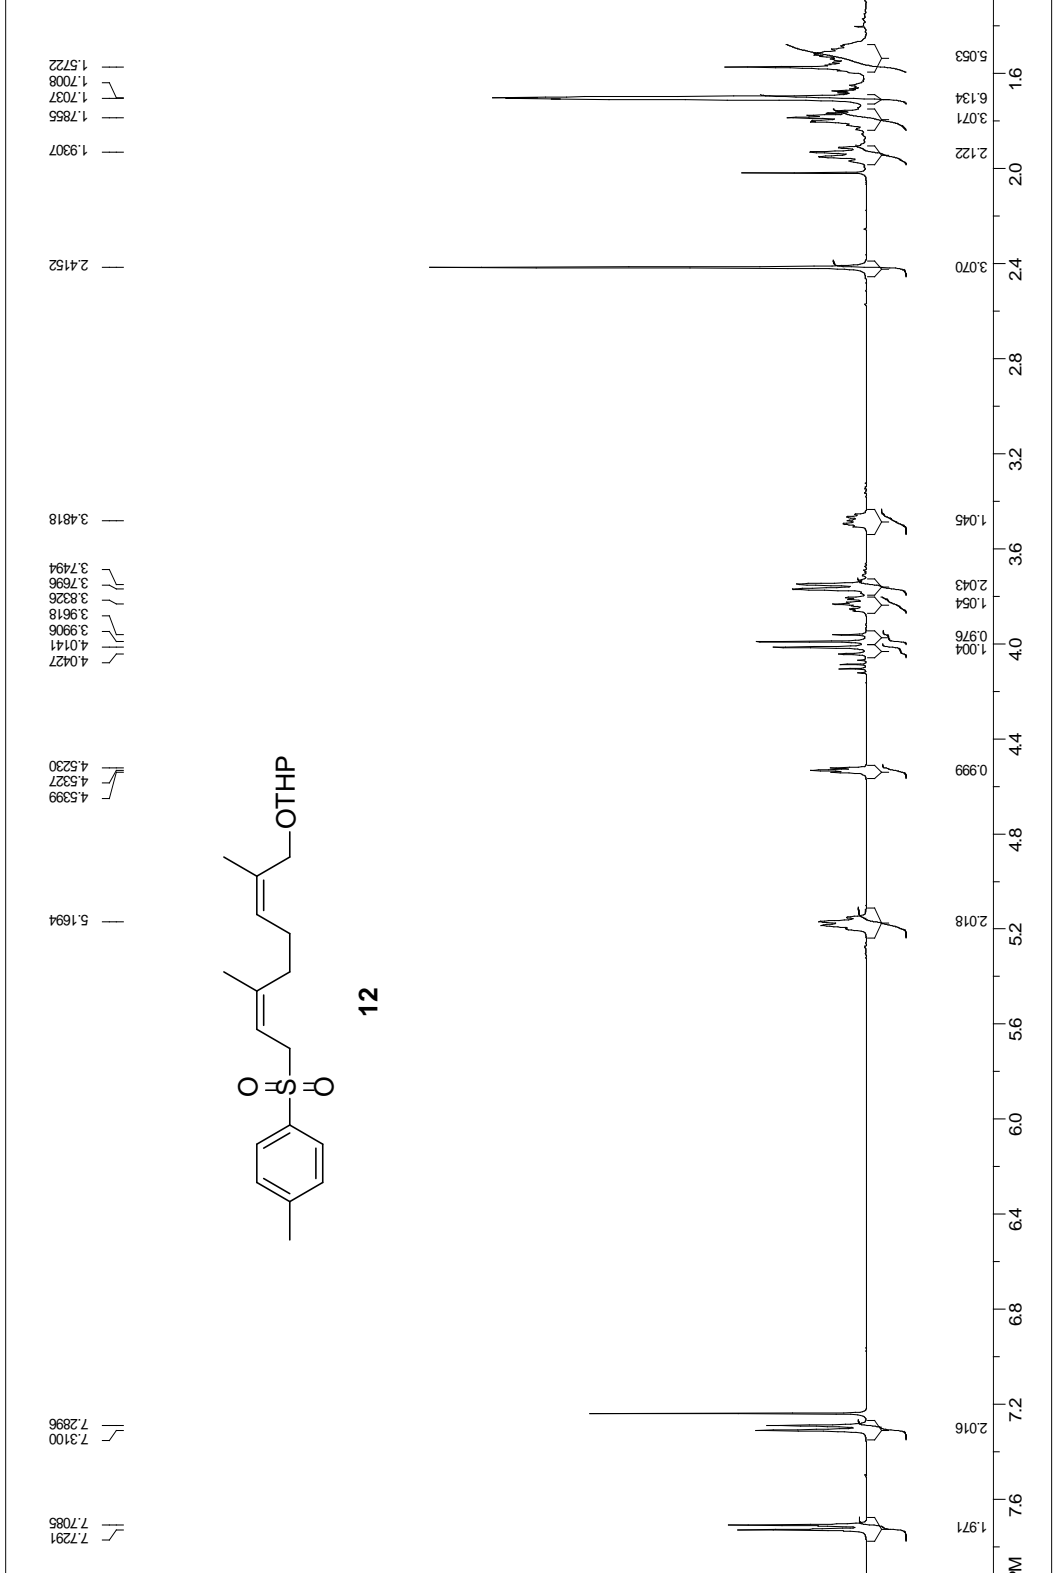

freq. of 0 ppm: 400.130018 MHz  
 processed size: 1.6884 complex points  
 LB: 0.000 GB: 0.0000

C:\Users\BWA\Desktop\BWA\NMR\BWA-3-B1\1d ext: -zgpgb-  
 smilar freq: 400.132671 MHz  
 domain size: 32768 points  
 r: 32768 16 Hz = 201.686513 ppm = 0.252629146 pt  
 bar of scans: 16

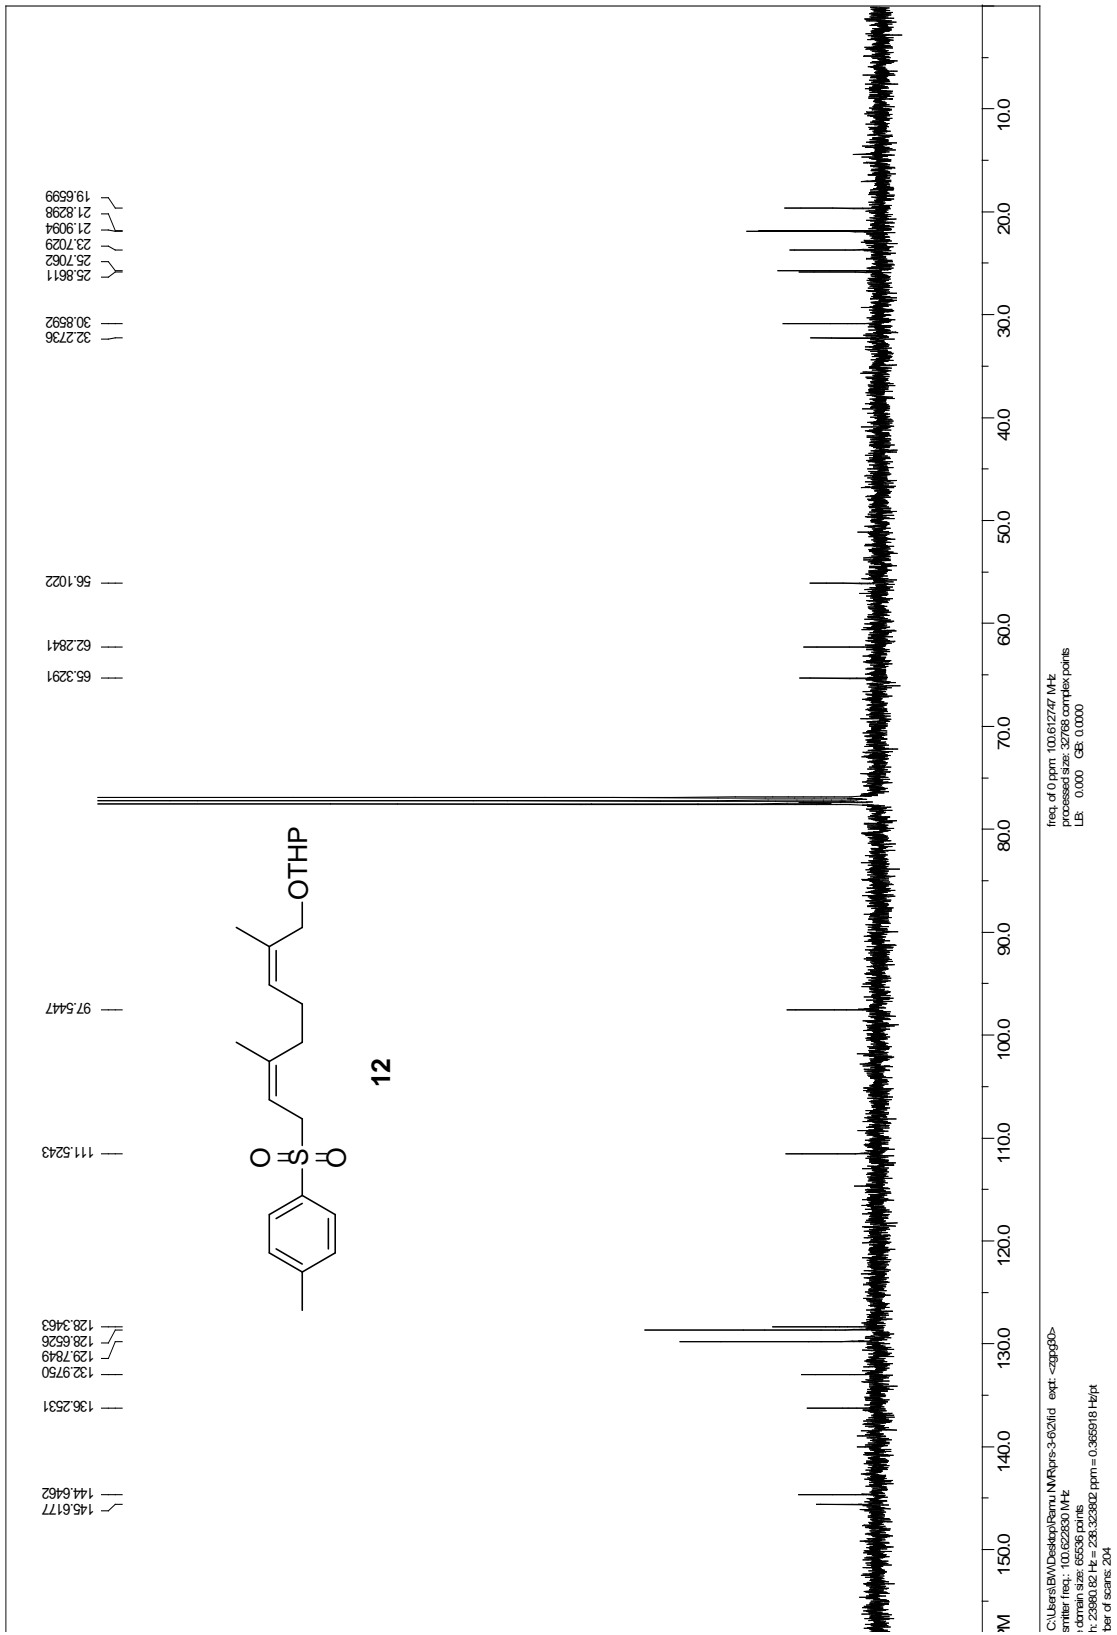

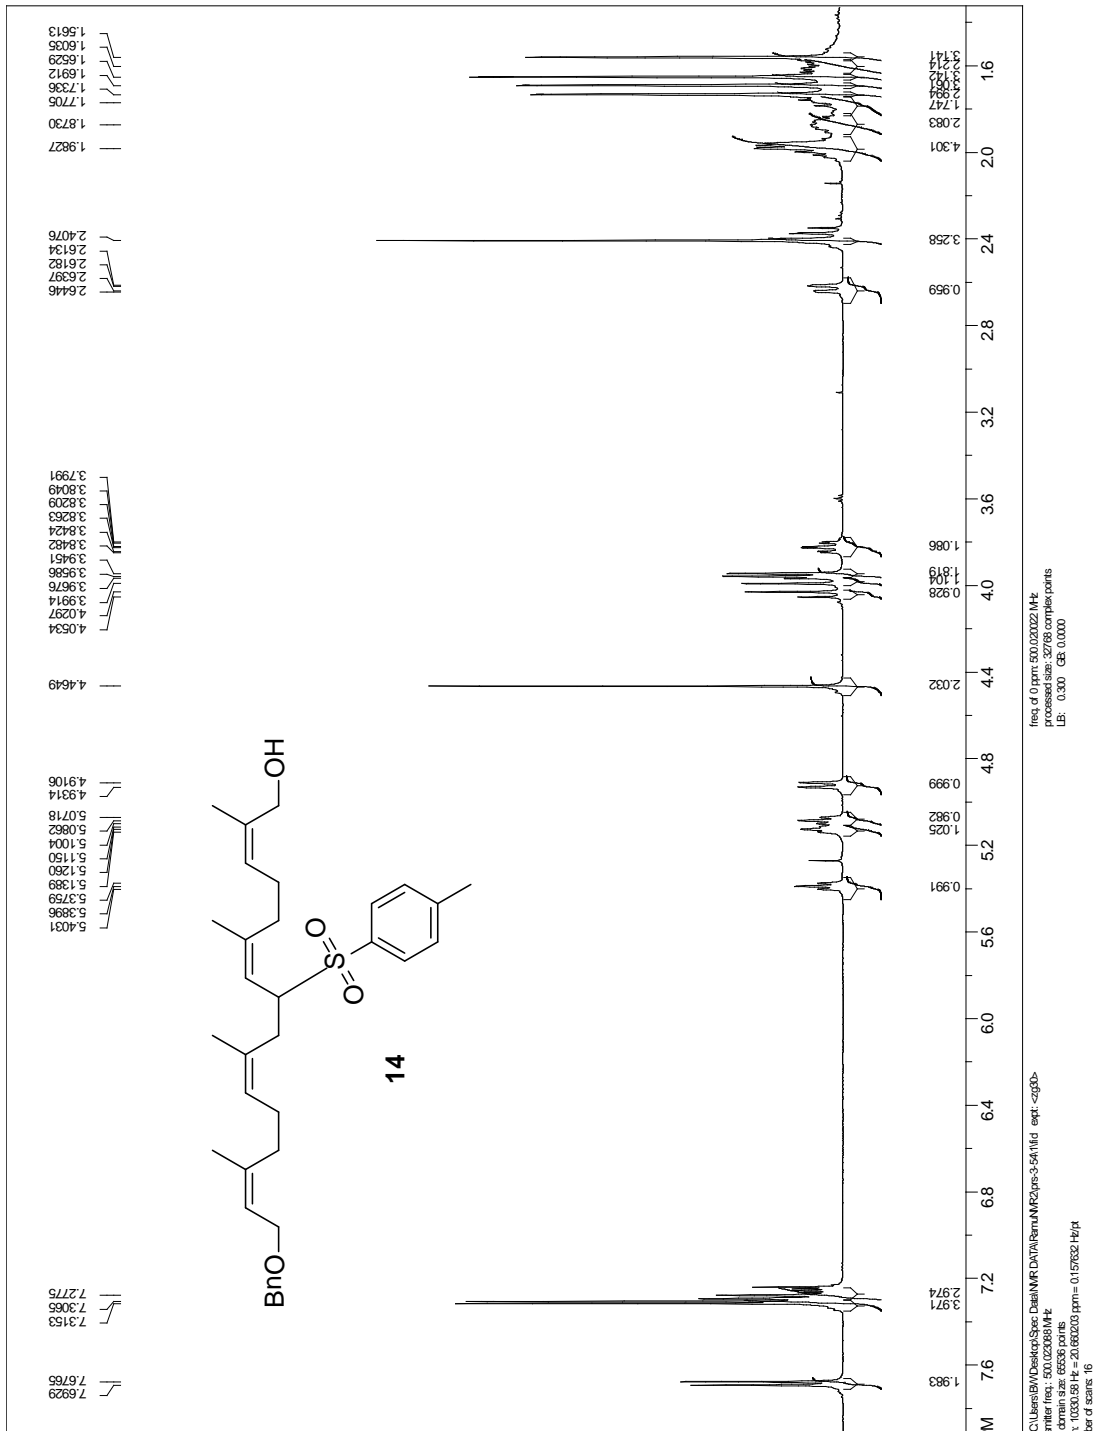

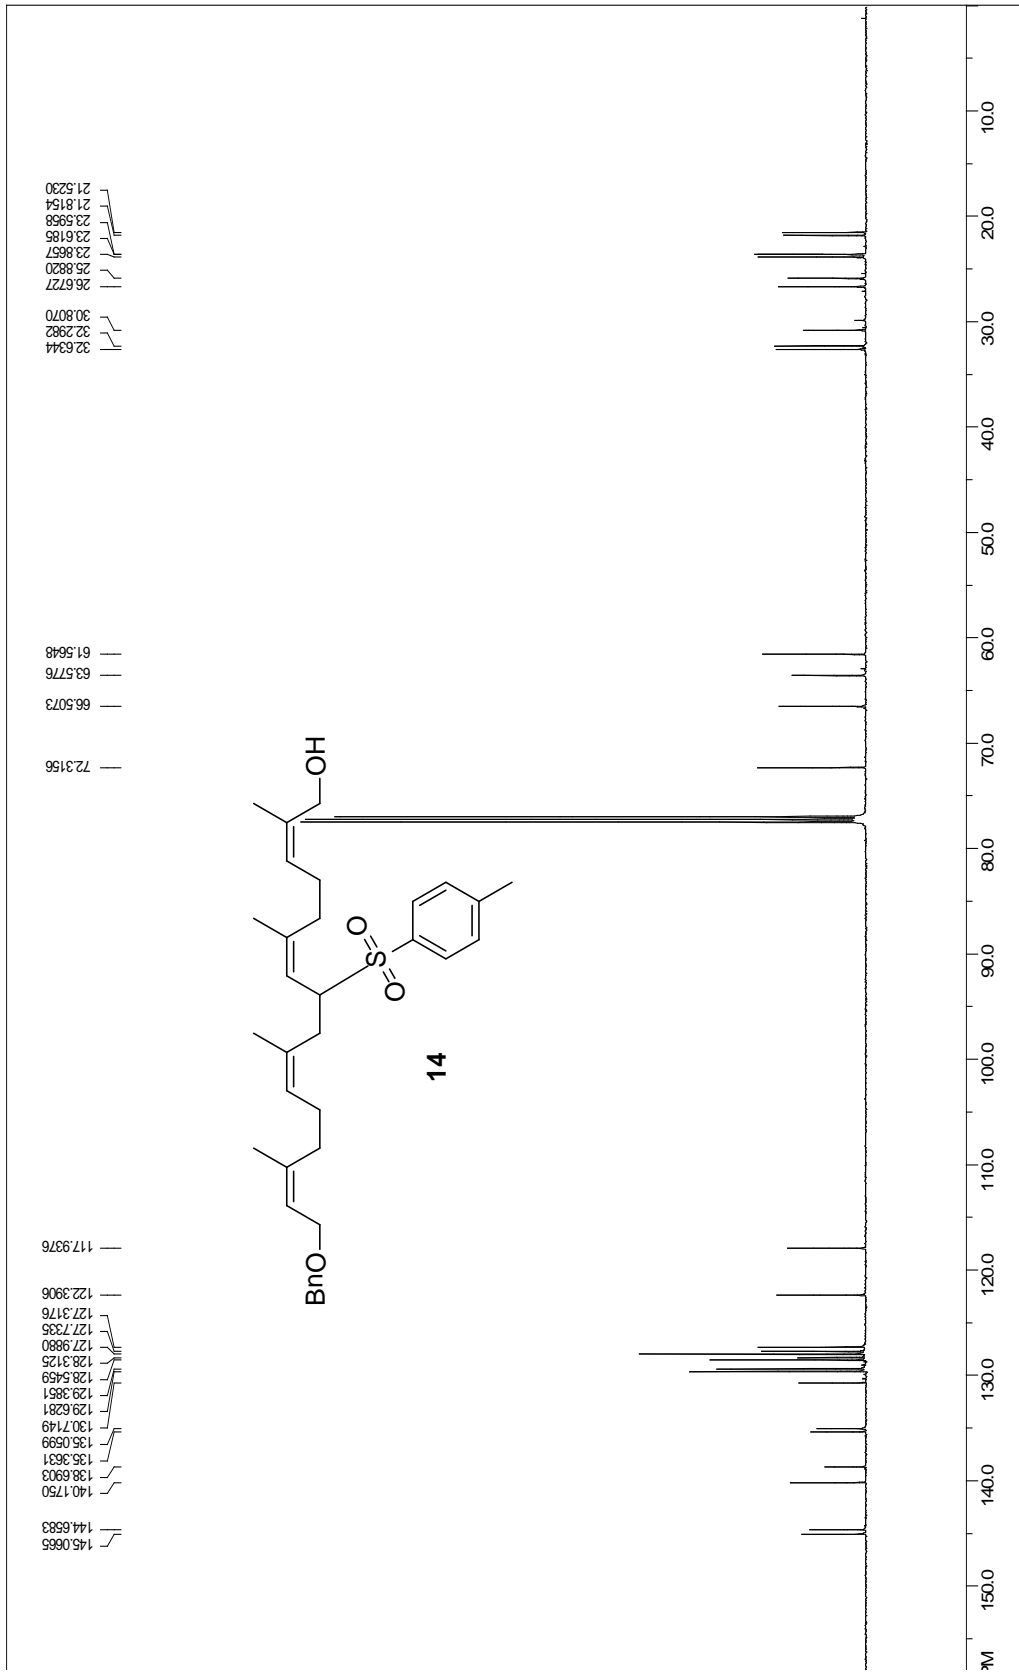

C:\Users\BAM\Desktop\Spec Data\MR DATA\Remun192\ps-3-5A21hd\_ exp. <gpgb>

smiler\_freq: 125.742702 MHz

r-domain size: 65536 points

f1: 30000.03 Hz = 238.821256 ppm = 0.458222 Hz/pt

number of scans: 4442

frec: of 0 ppm 125.730104 MHz

processed size: 32768 complex points

LB: 1.000 GB: 0.0000

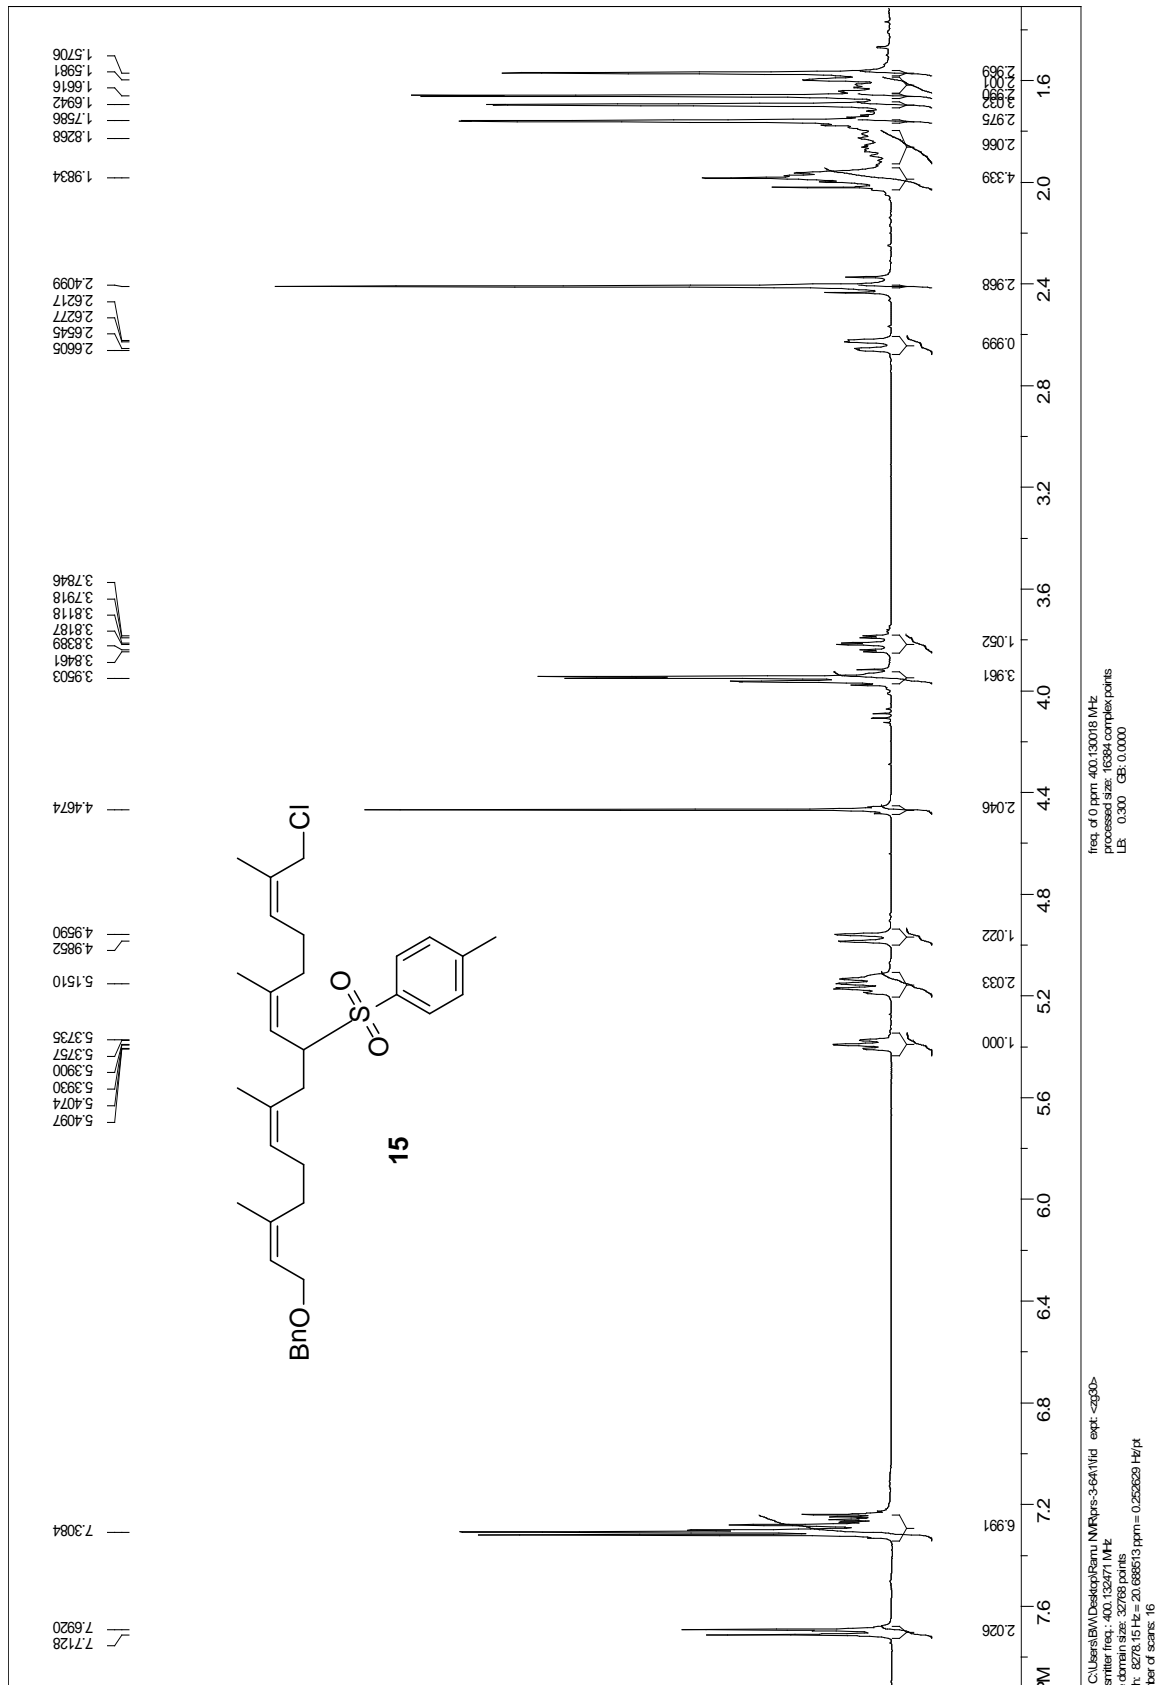



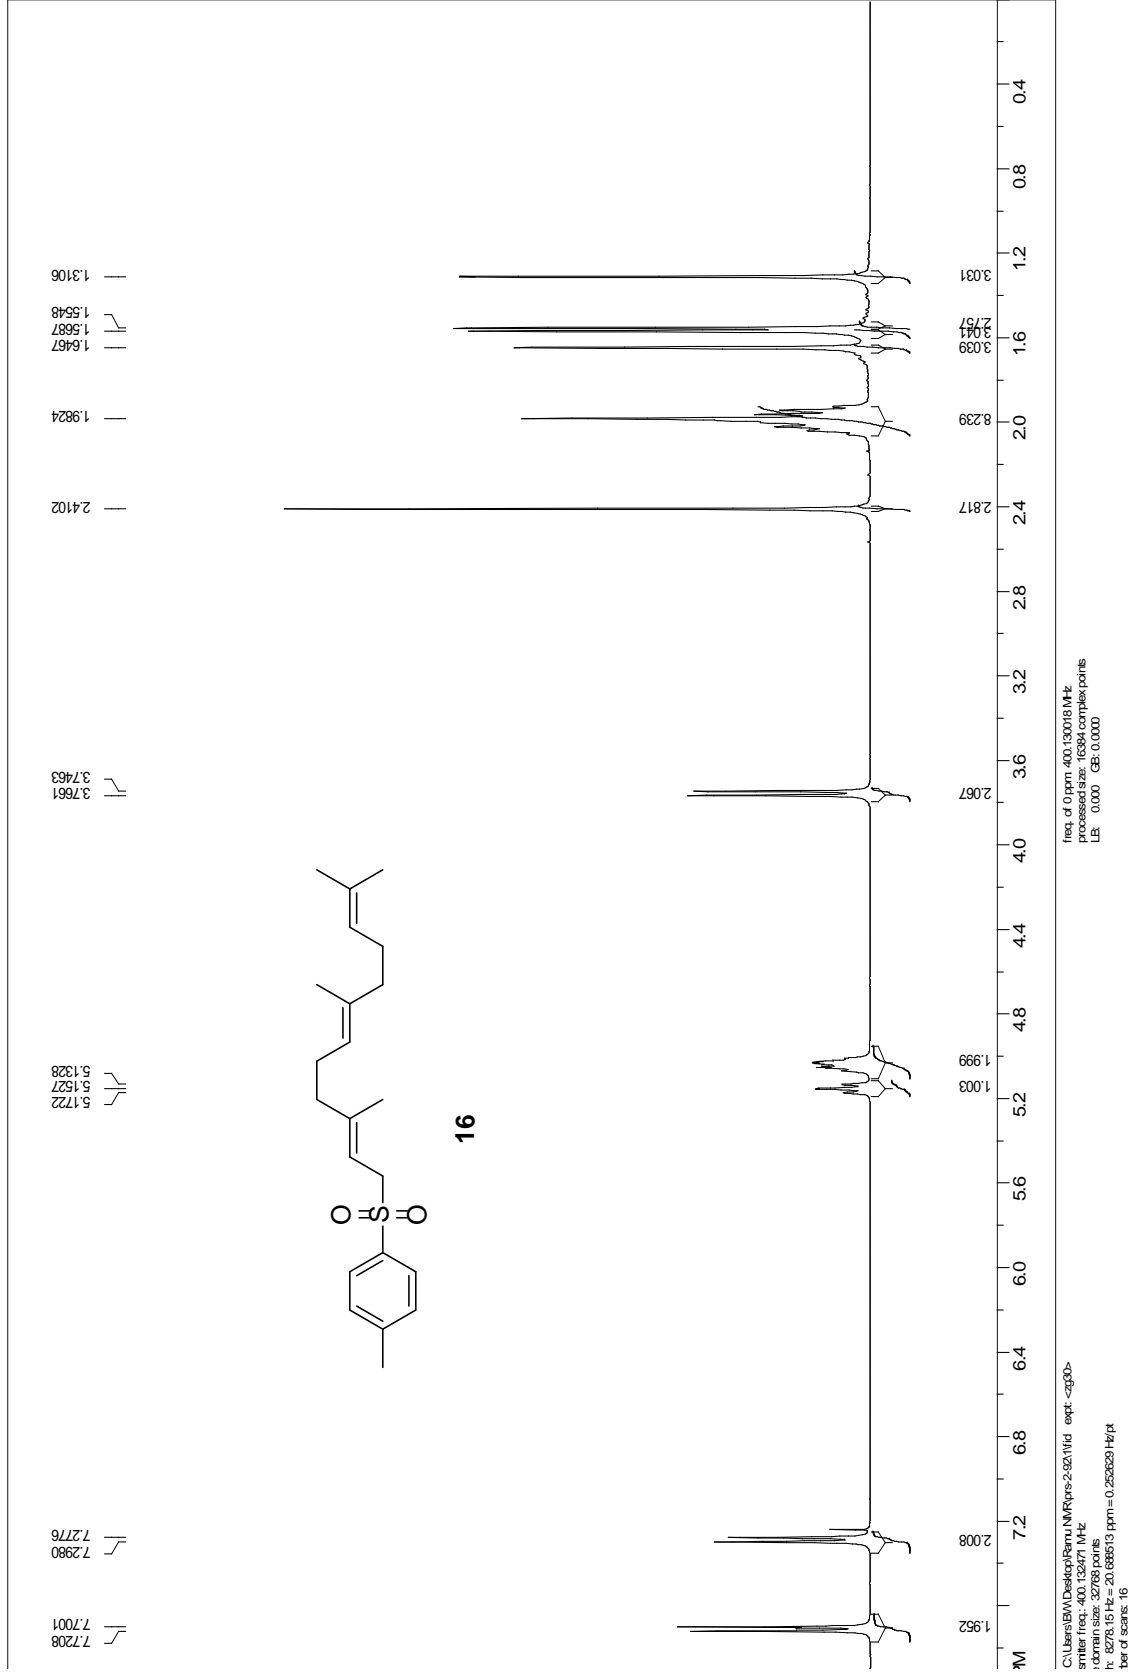

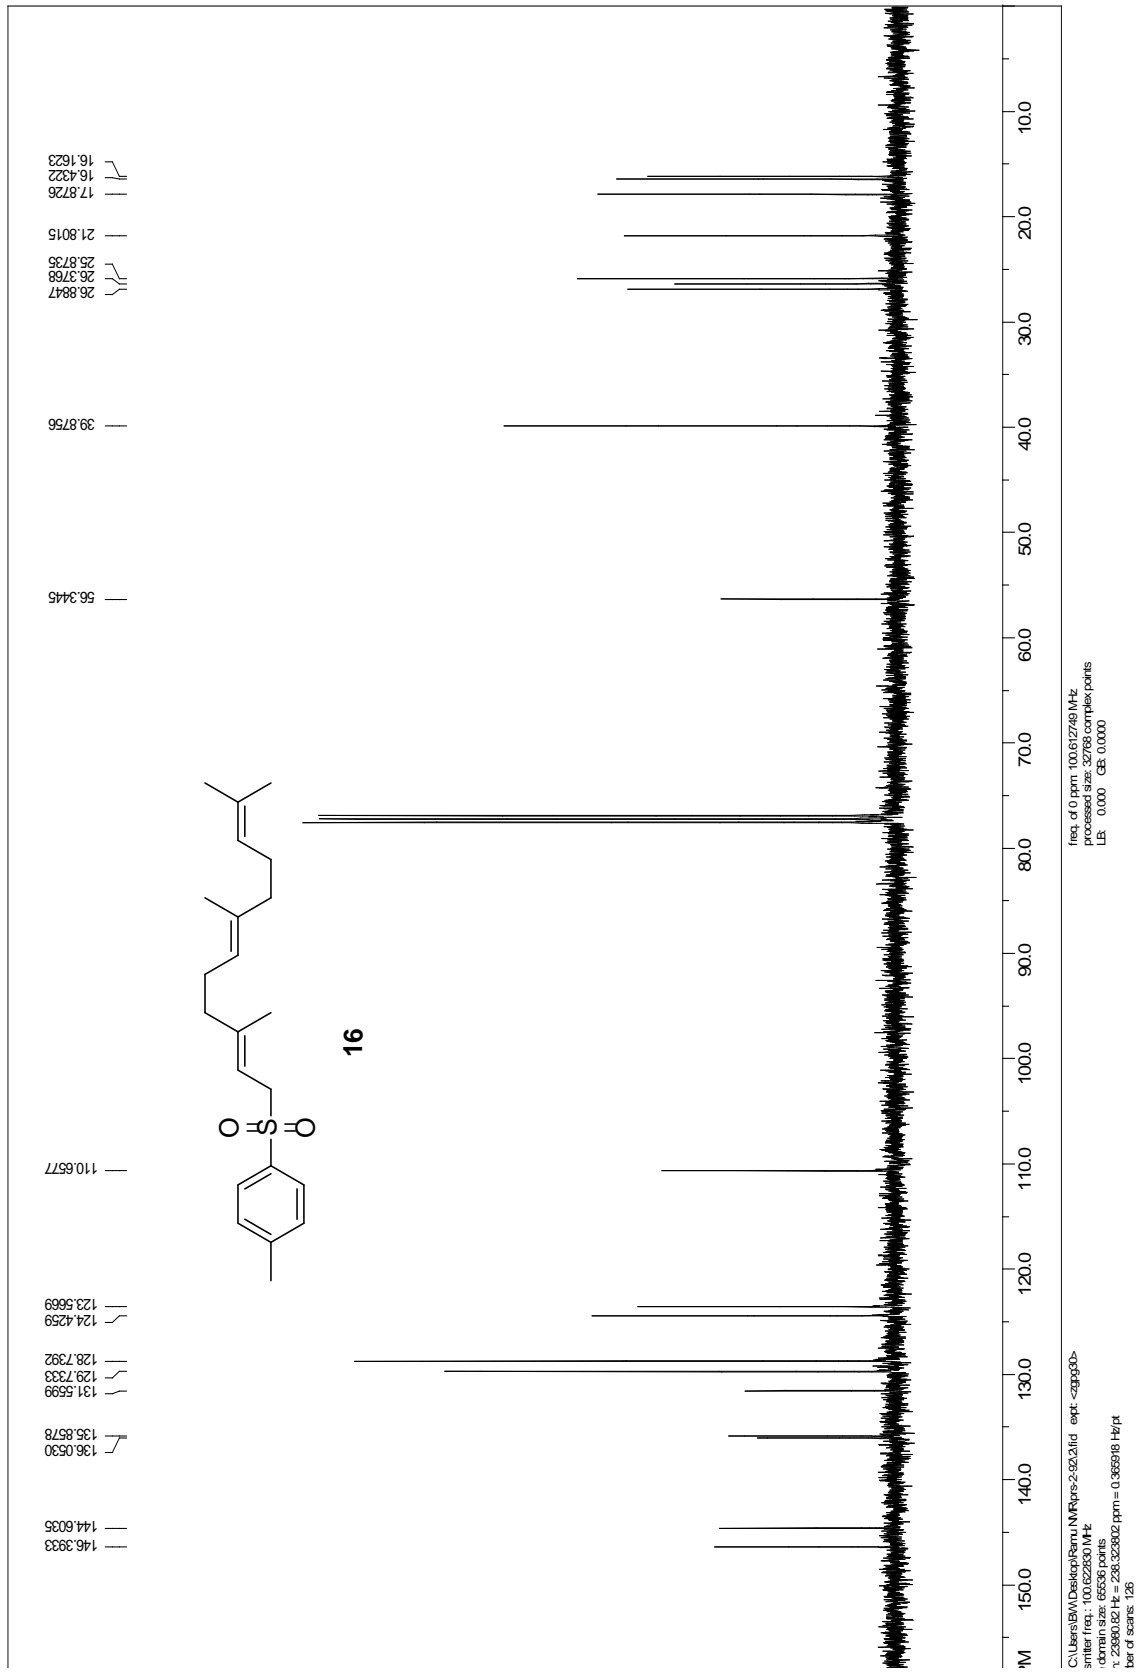



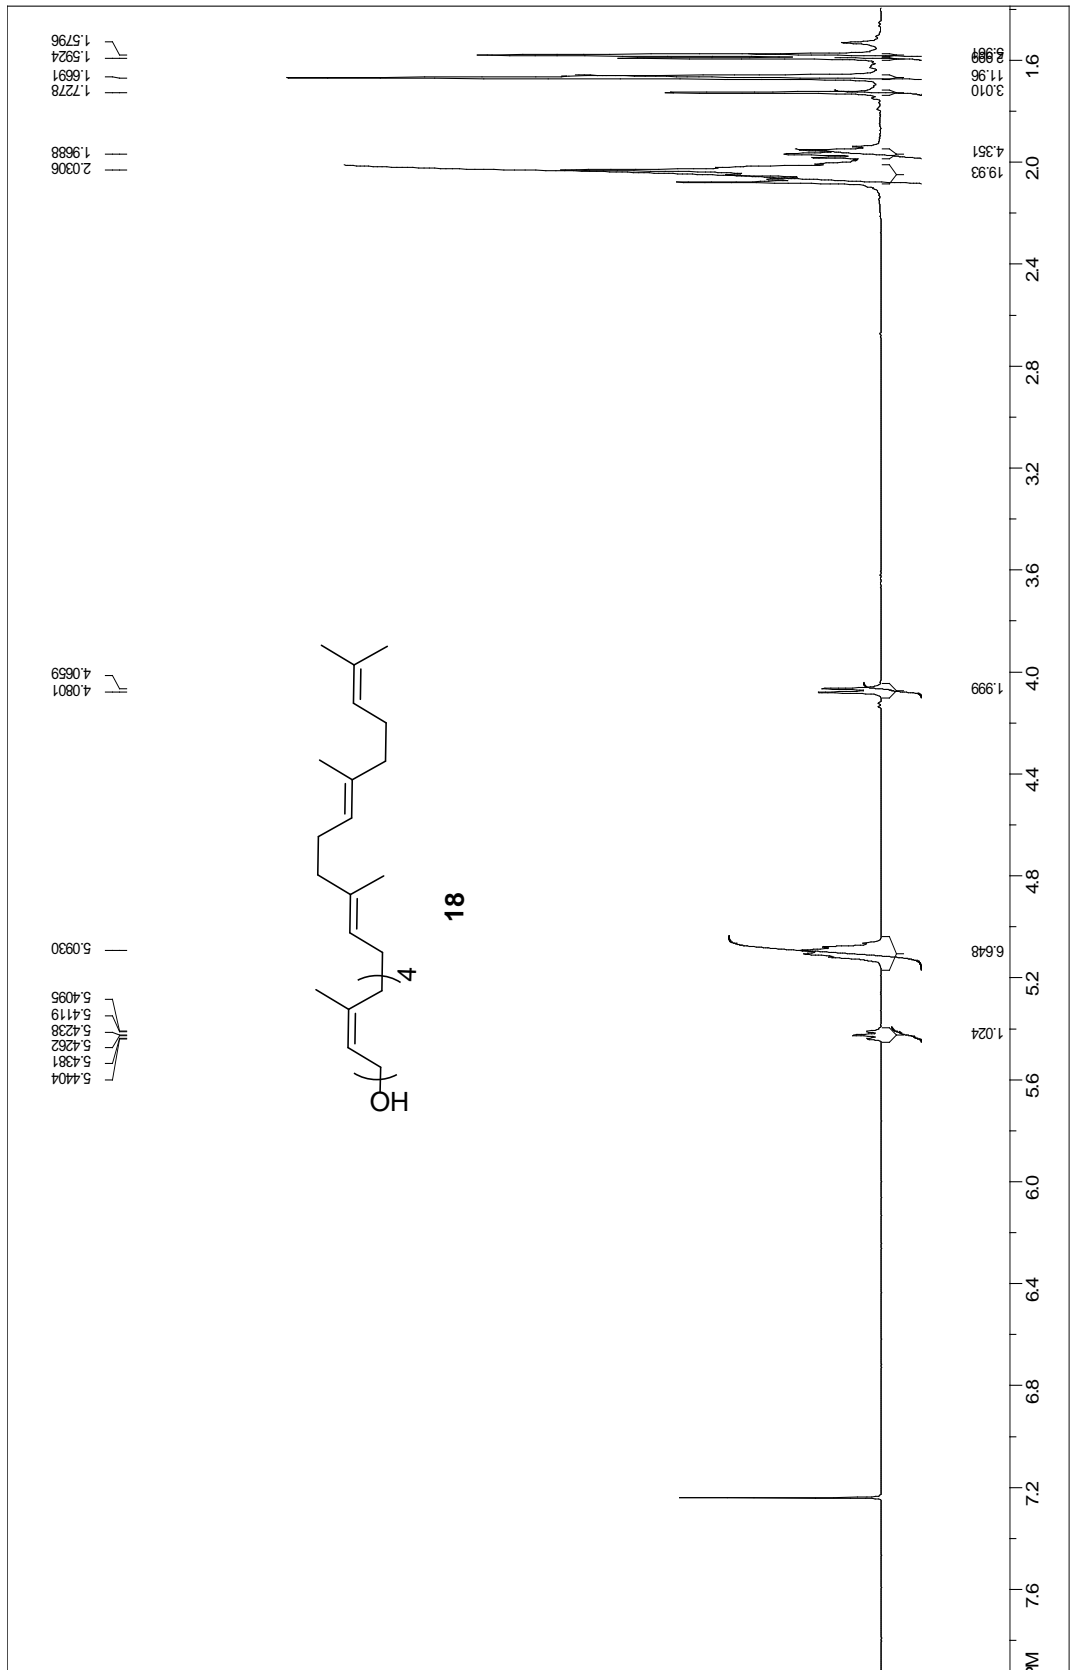

C:\Users\BVD\Desktop\Spec Data\NMR DATA\Wyz Project\Heptaprenol\1\1d exp1 ->g00-  
 smilar file: 500.0202022.MHz  
 carrier file: 65530.pcm.ms  
 date: 20.06.2010 15:41:23  
 bar of scans: 16  
 freq of 0 ppm: 500.0202022.MHz  
 processed size: 32788 complex.points  
 LB: 0.000 GB: 0.0000

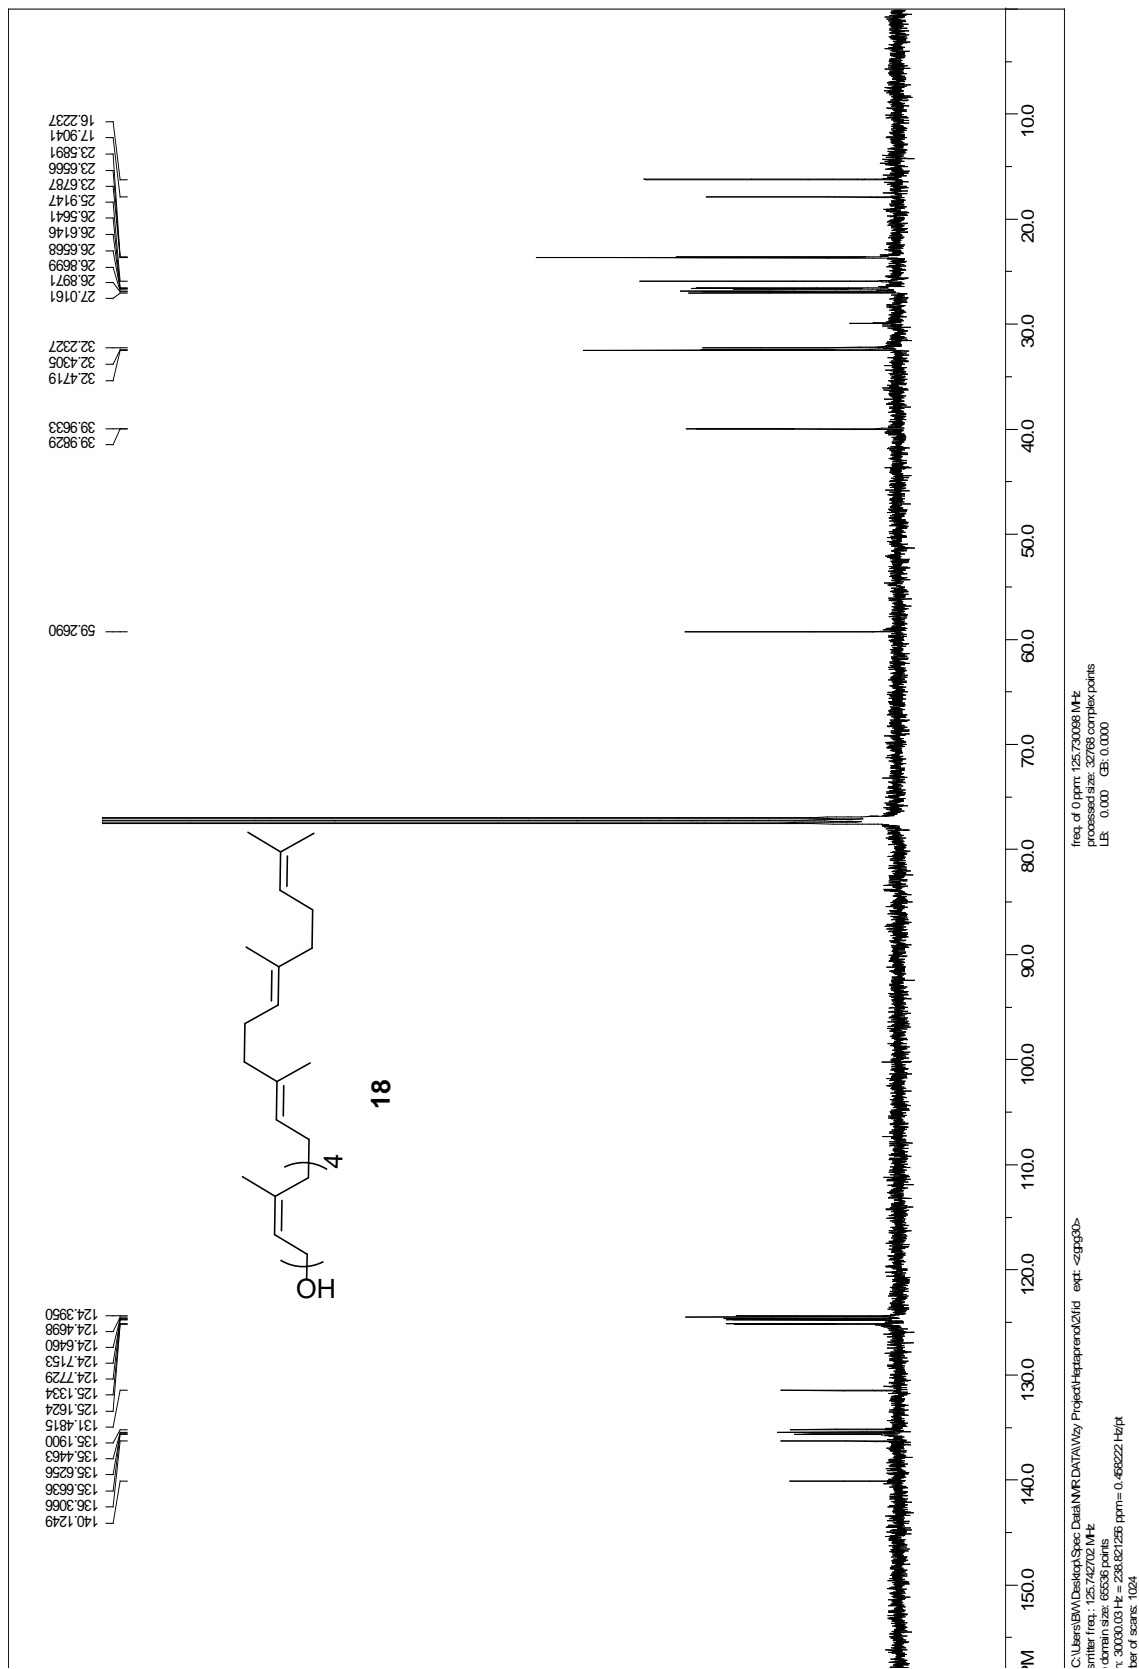

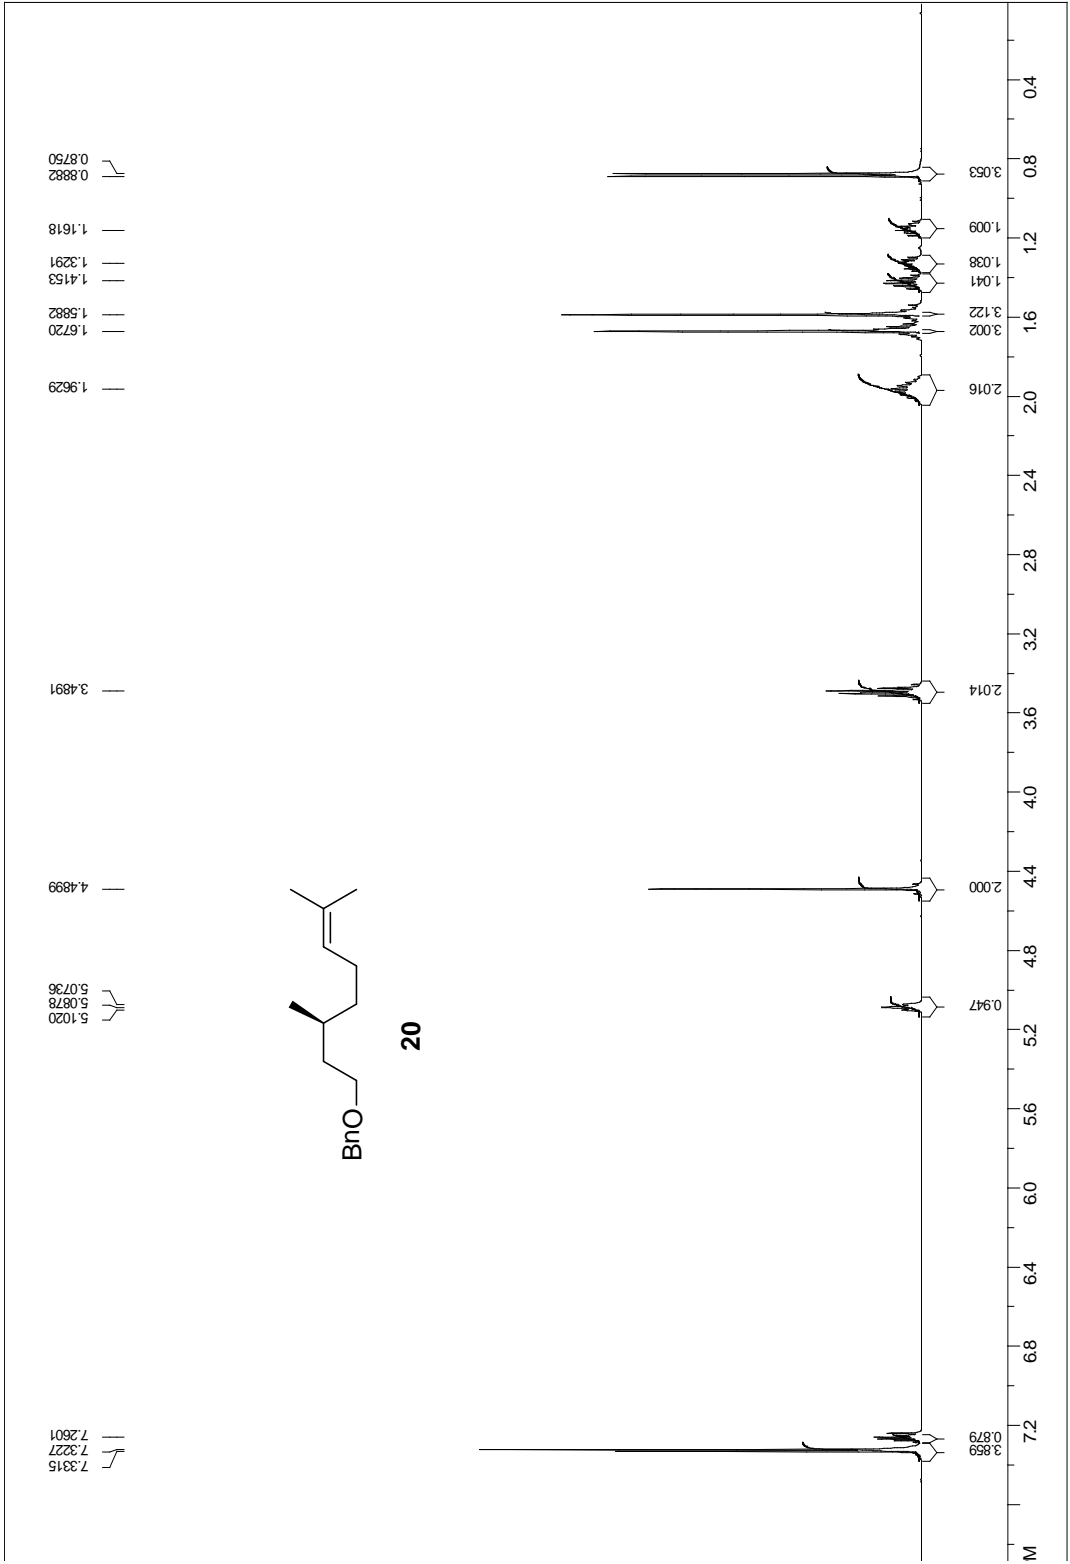

freq: 0 ppm; 50.02022 MHz  
 Processed Size: 2768 complex points  
 LS: 0.000 GB; 0.0000

C:\Users\BVM\Desktop\Spec Data\NMR DATA\Wzy Project\Delchidol Derivative\BfCitronellol\11\td exp1 ->gfb->  
 11/11/2011 10:30:58 AM  
 Y: 10380.63 Hz = 20.692028 ppm = 0.157632 Hz/g  
 ber of scans: 16

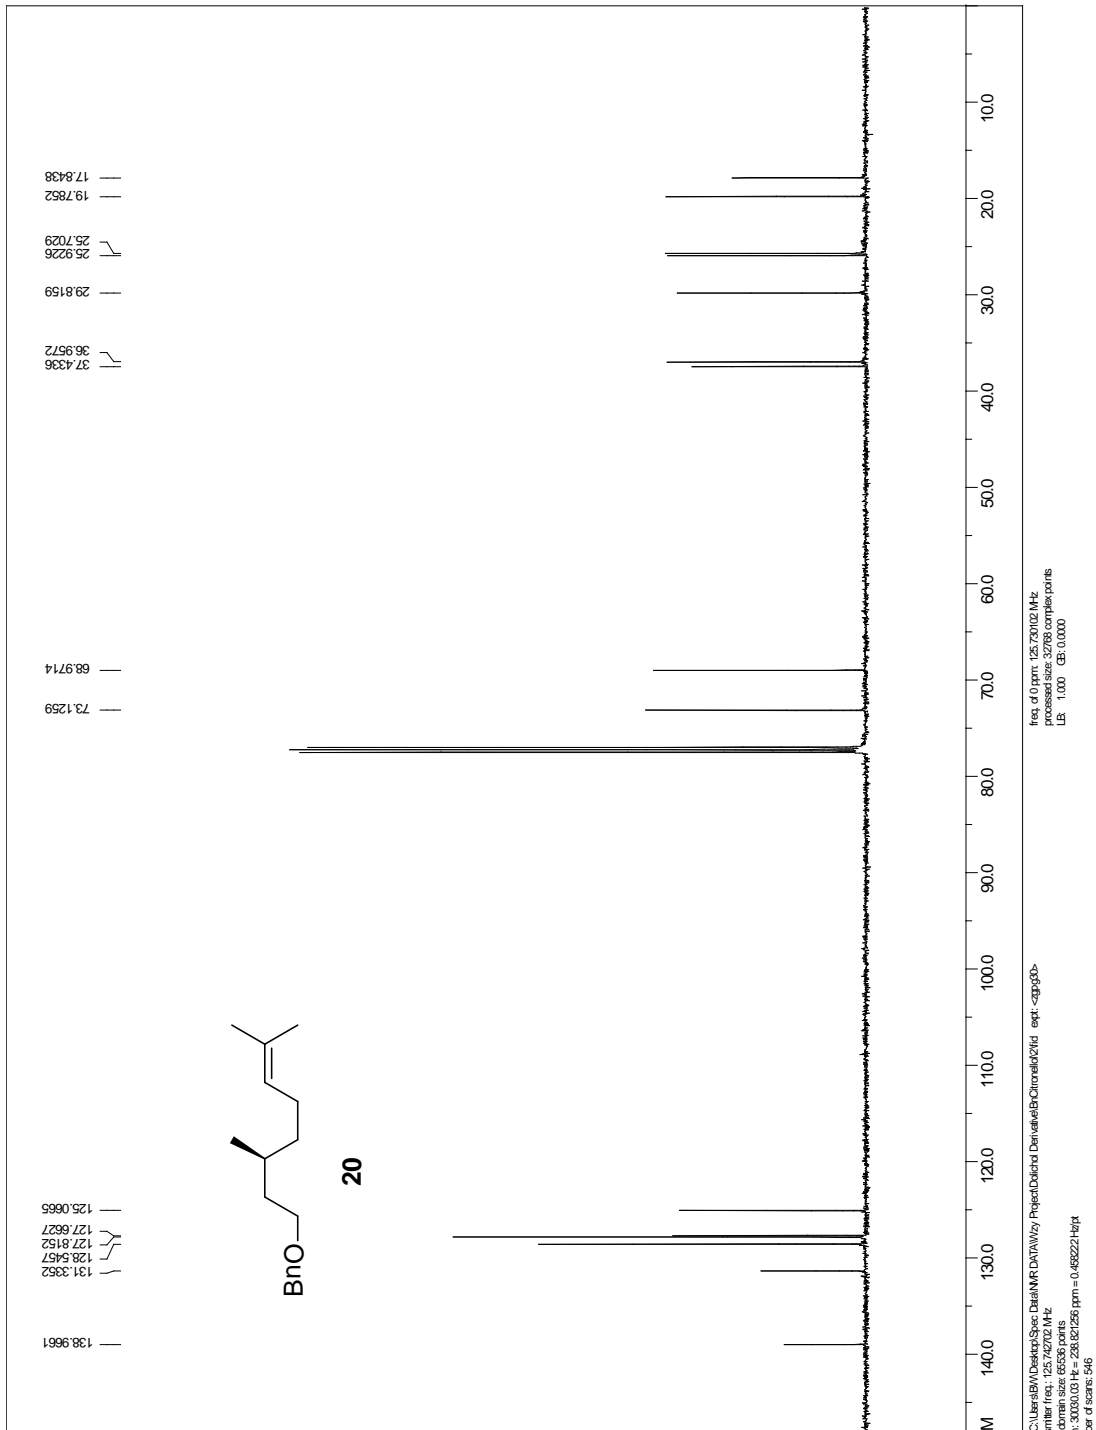

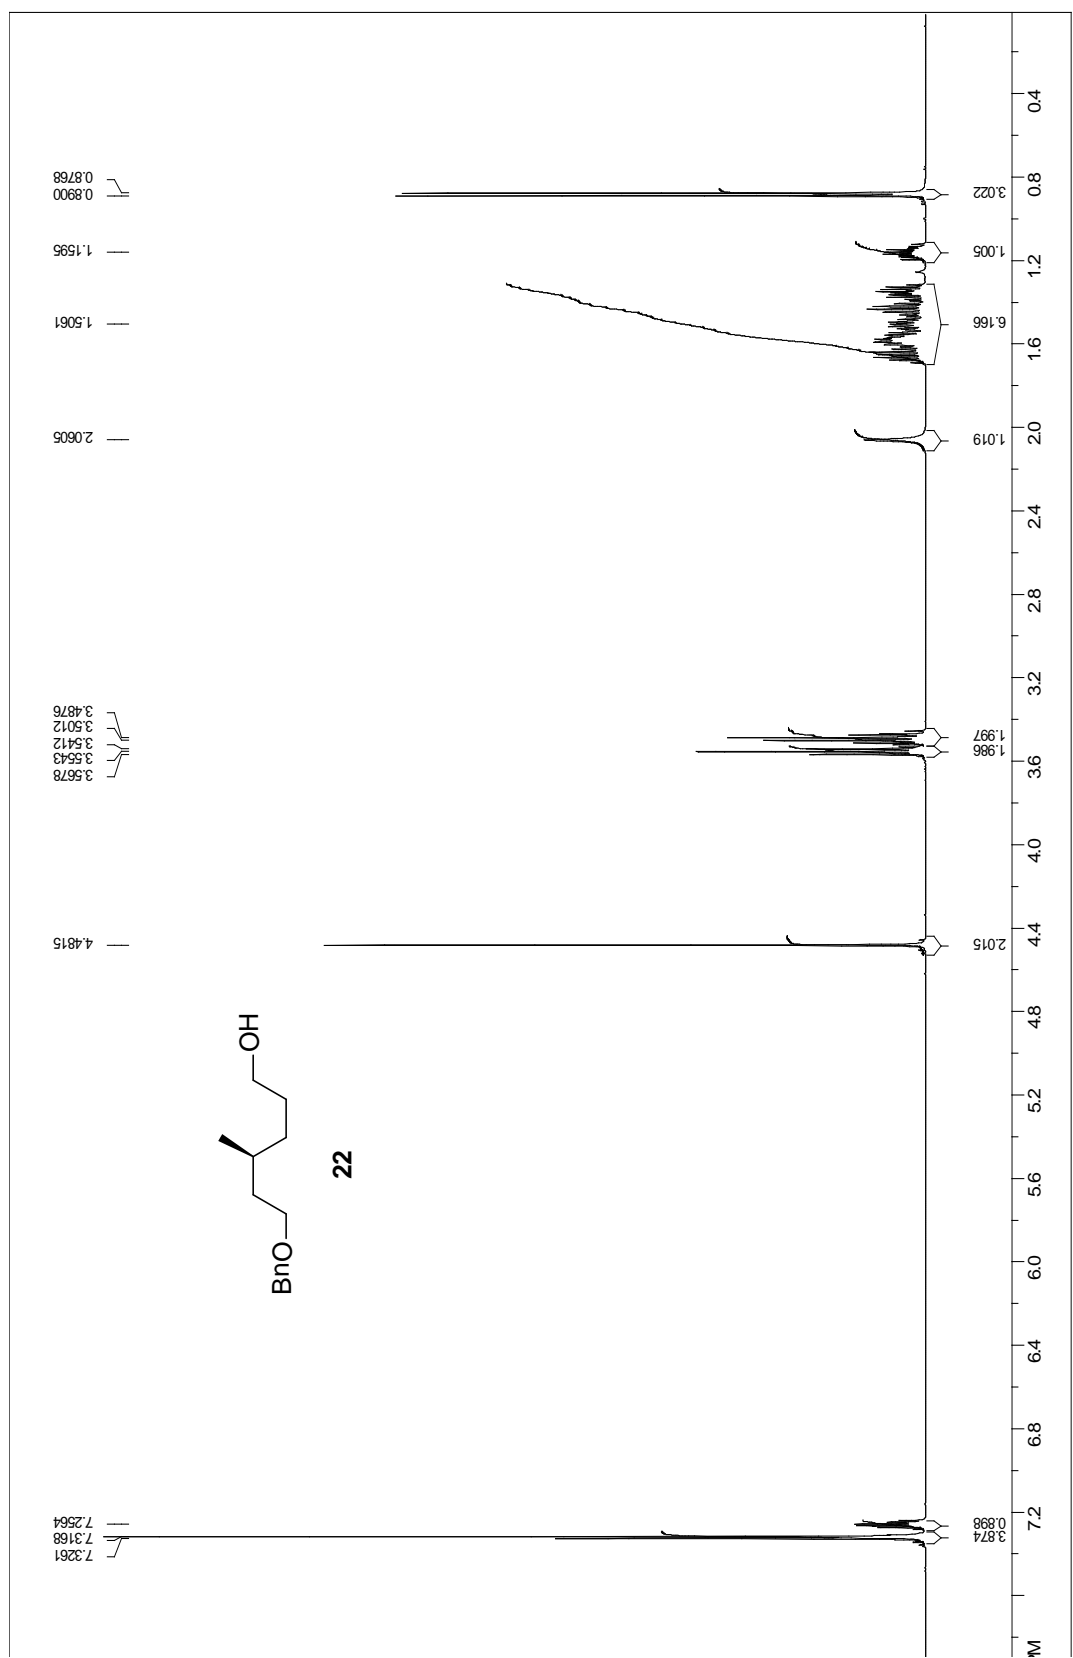

C:\Users\BWI\Desktop\Spec Data\NMR\DATA\Way Project\1Dolalol Derivative\BnOCH1\1d exp1 -srg50-  
 smiter freq.: 500.022068 MHz  
 domain size: 65636 points  
 1: 10330.58 Hz = 20.660273 ppm = 0.157632 Hz/pt  
 bar of scans: 128  
 freq. of 0 ppm: 500.020021 MHz  
 processed size: 32768 complex/points  
 LB: 0.000 GB 0.0000

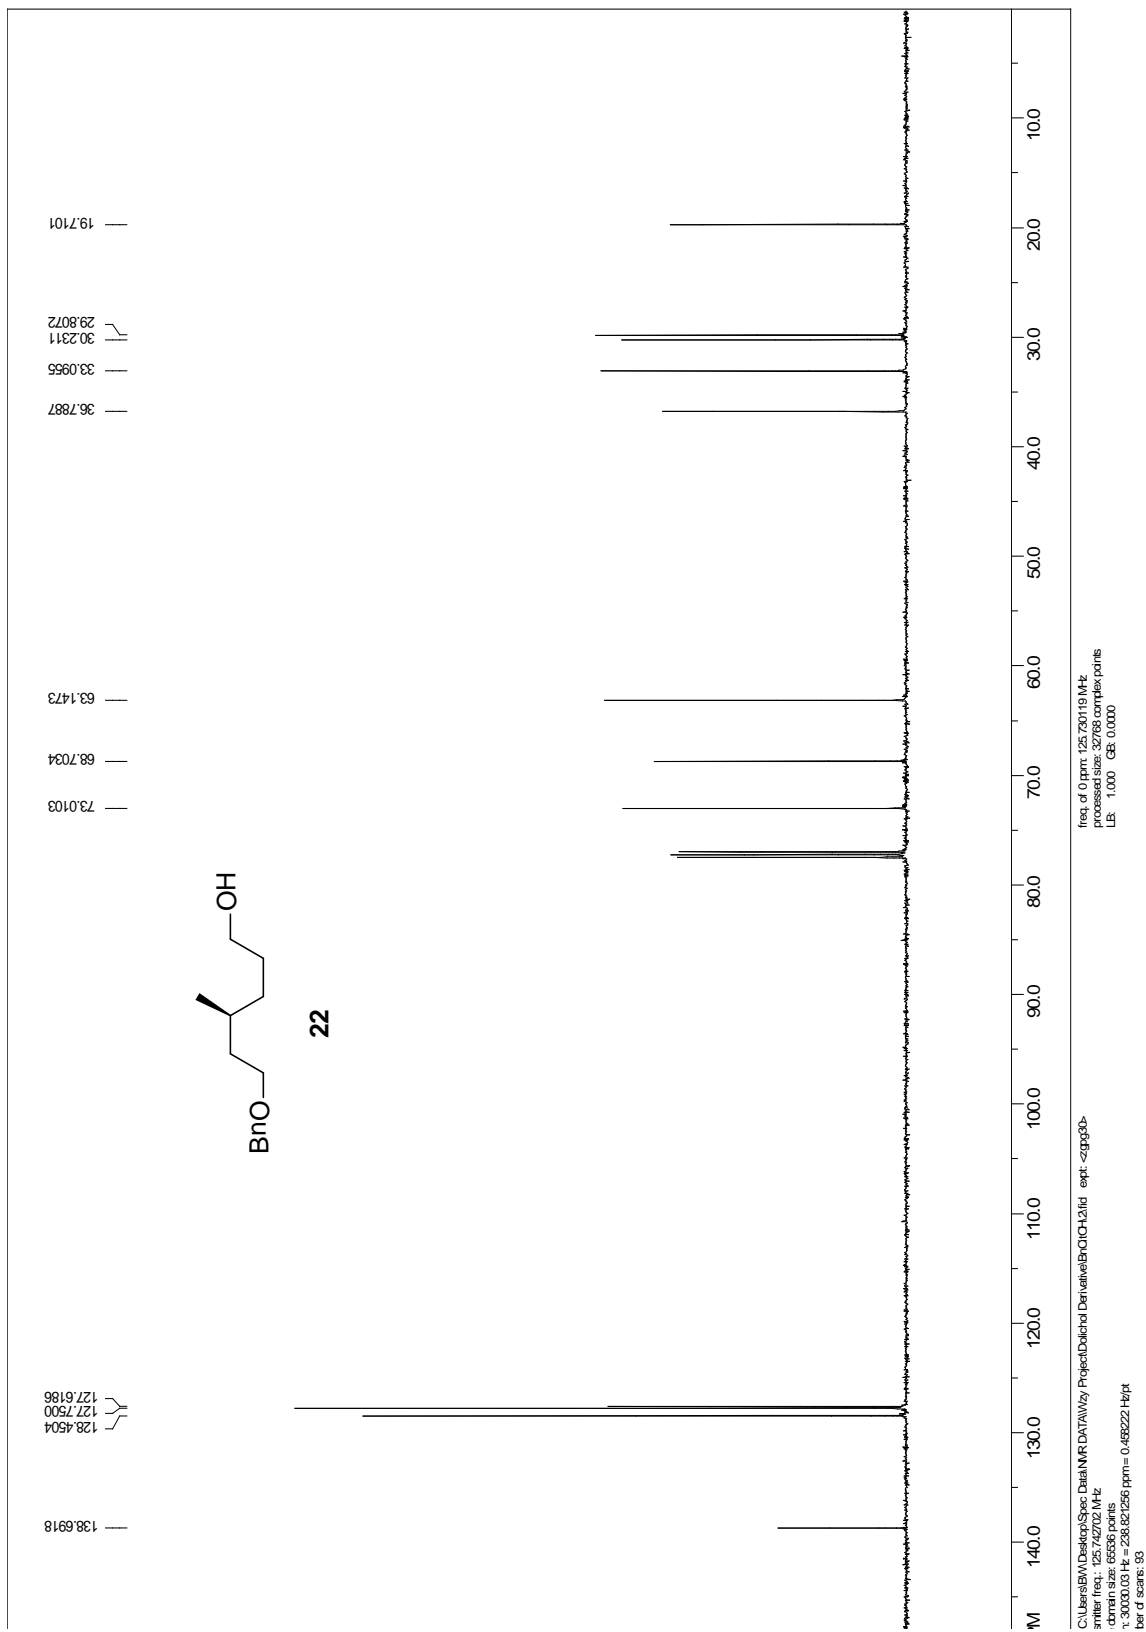

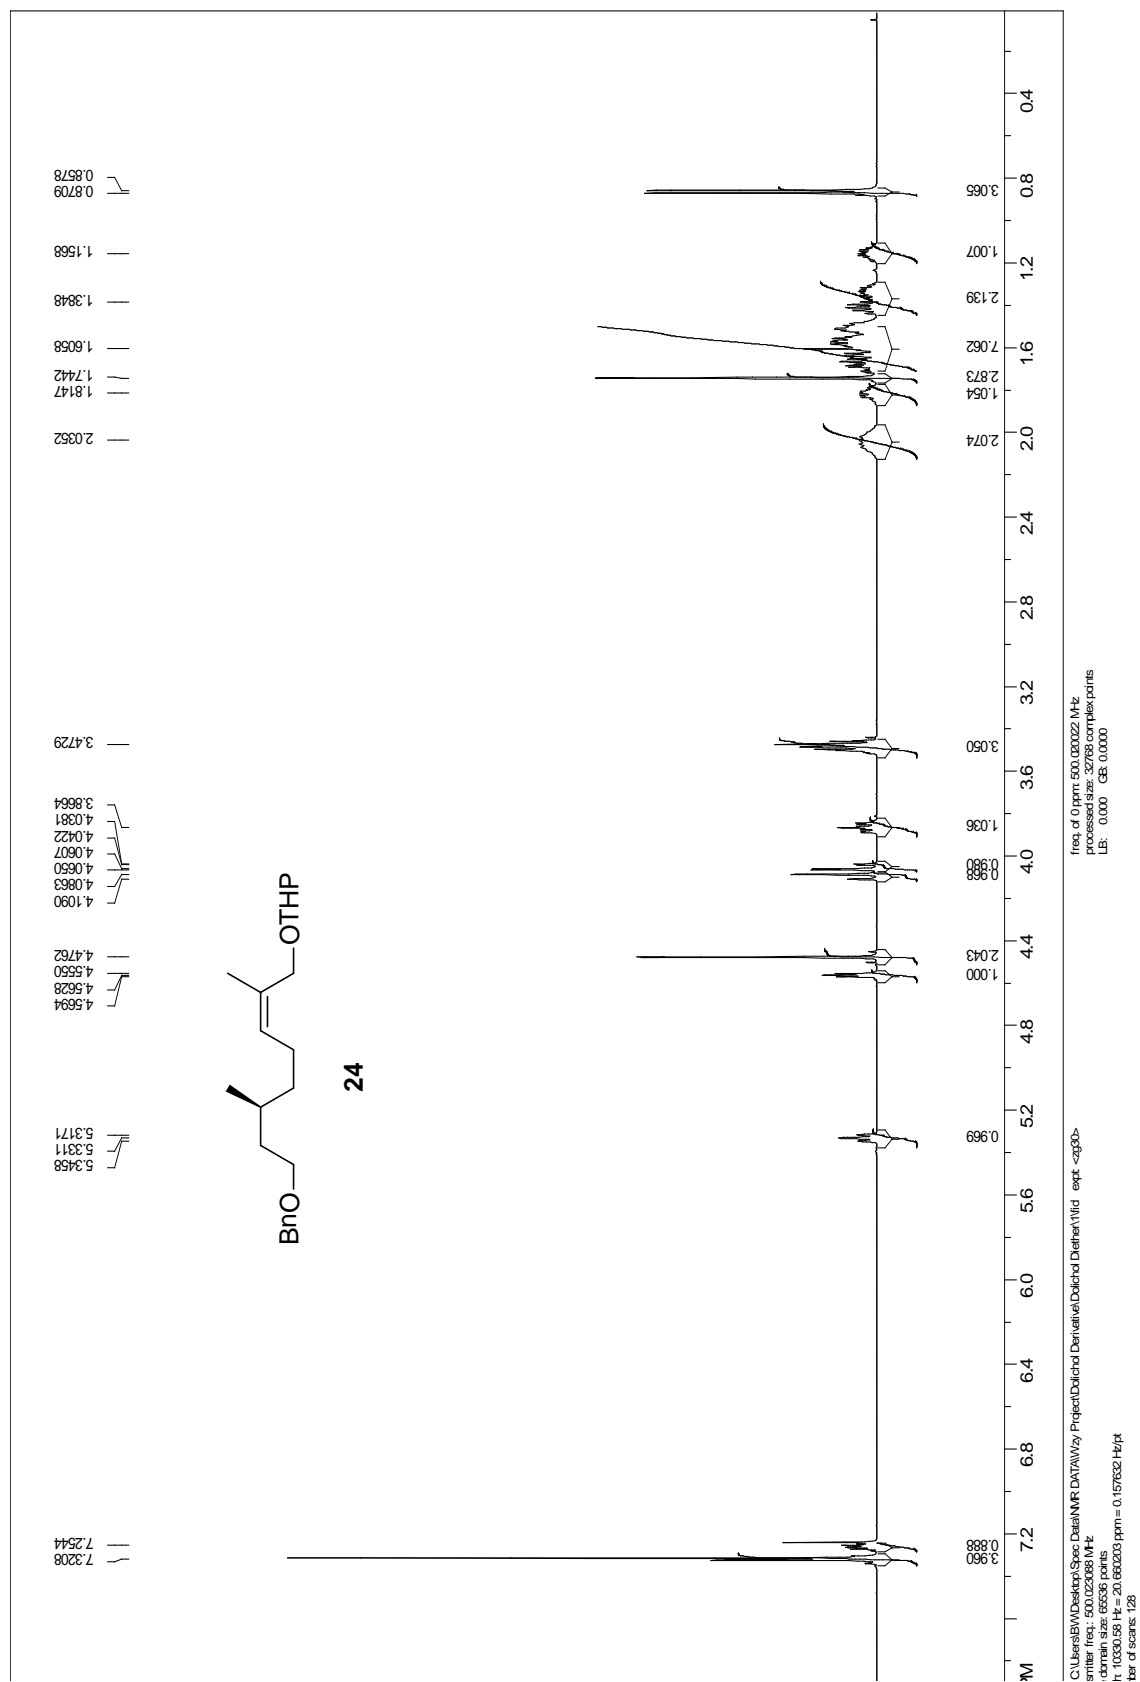

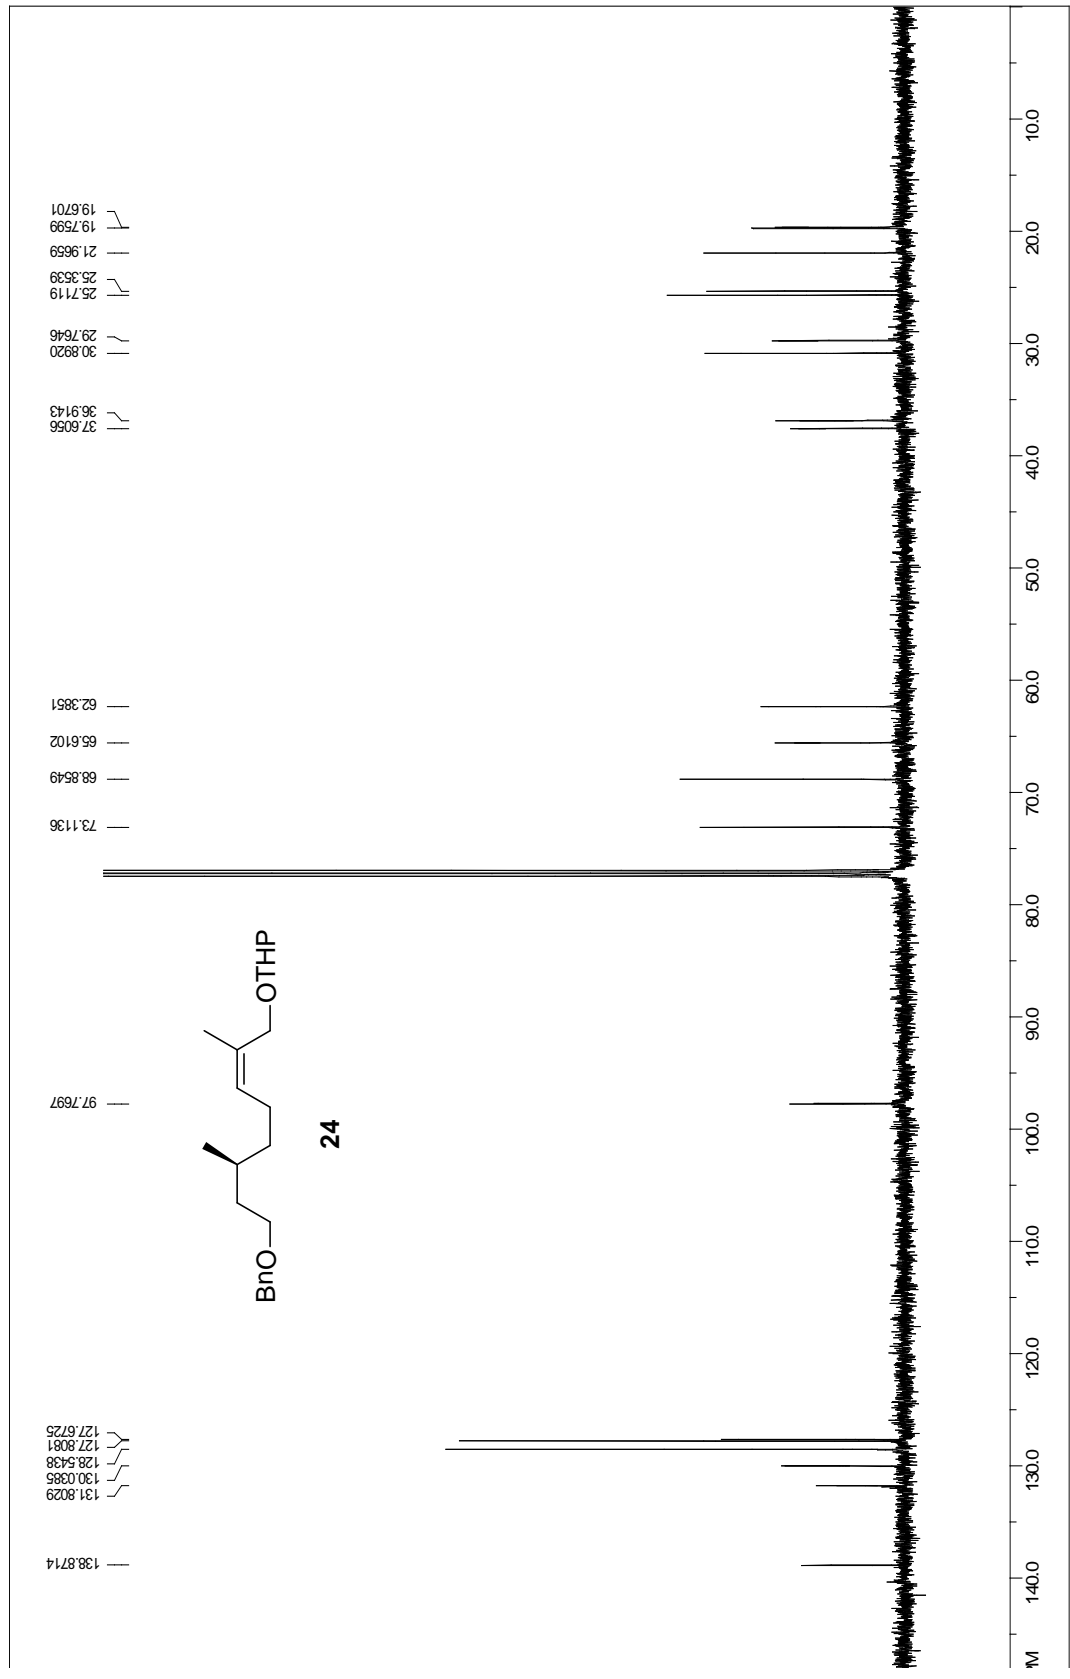

freq. of 0 ppm: 125.730108 MHz  
 processed size: 327788 complex points  
 LB: 1.000 GB 0.00000

C:\Users\BWD\Desktop\Spec Data\NMR DATA\Wzy Project\Dalchini Derivative\Dalchini Diether\2\1d exp1 -s3g3g3-  
 smiler freq.: 125.742702 MHz  
 channel: 600.131415  
 compound: 24  
 date: 2018.08.12 08:12:56 ppm= 0.468222 Hzpt  
 bar of scans: 256



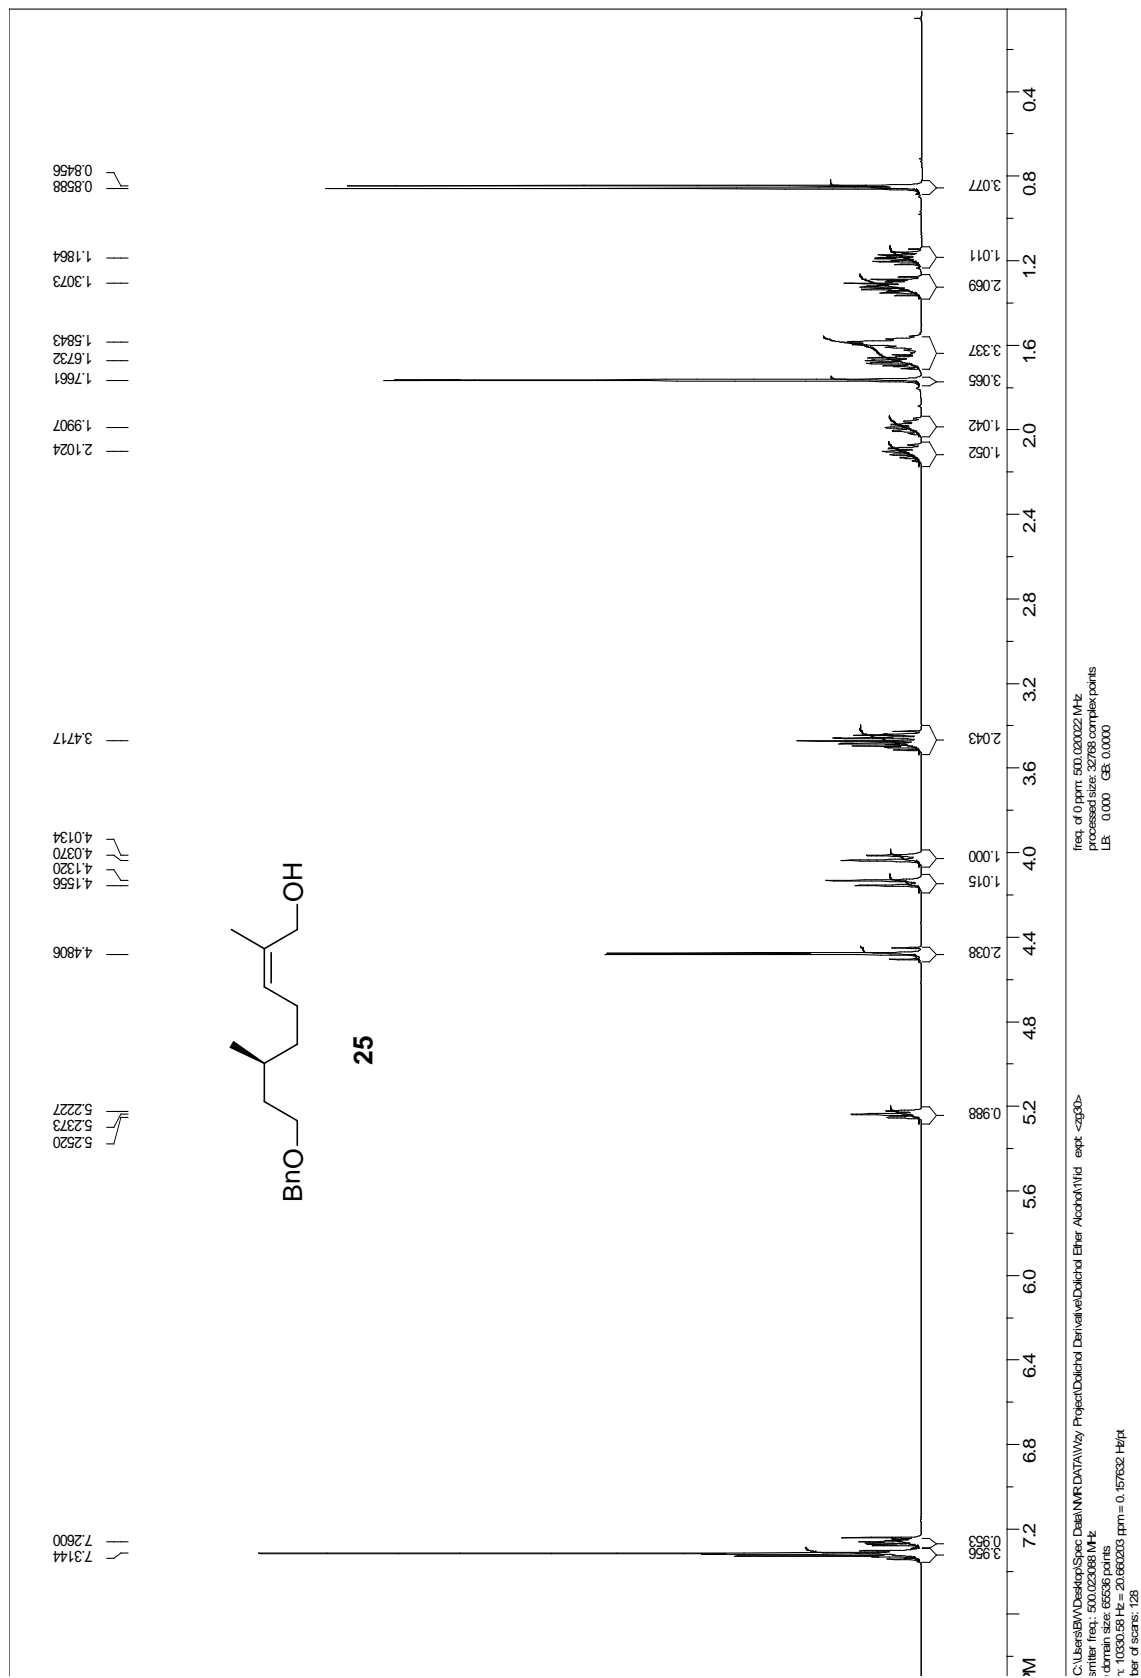

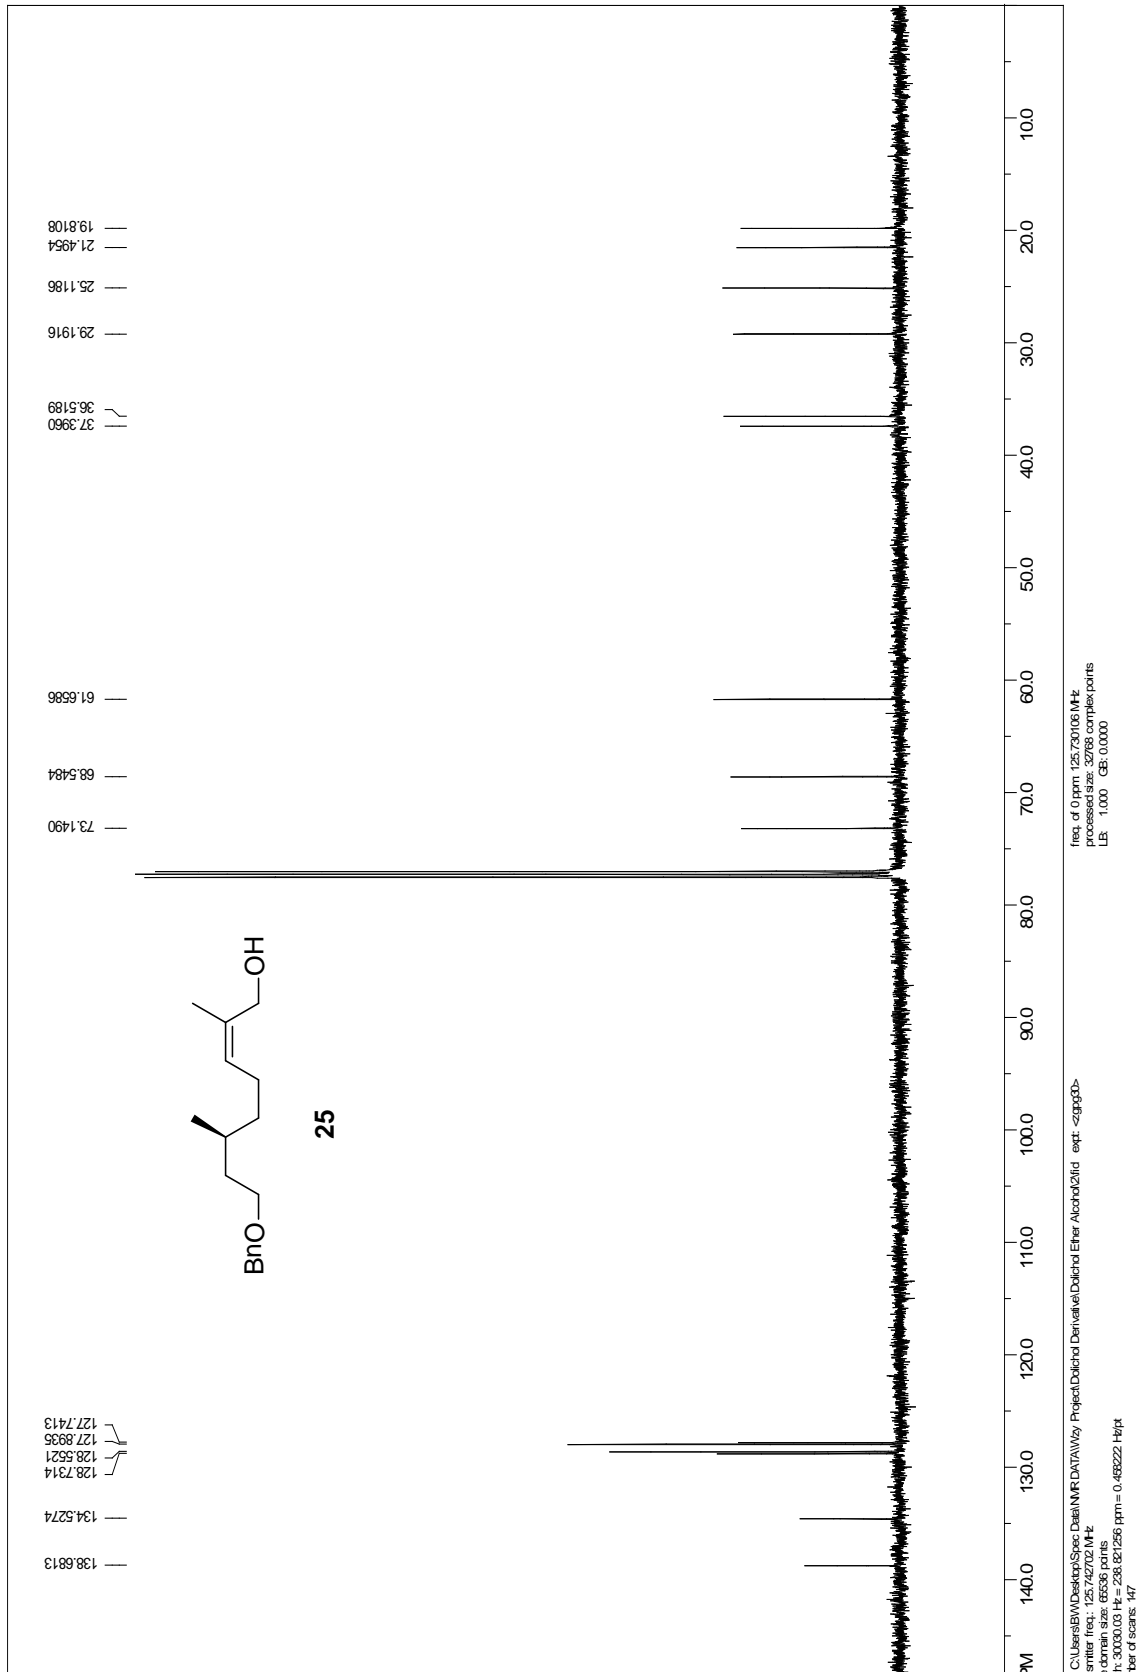

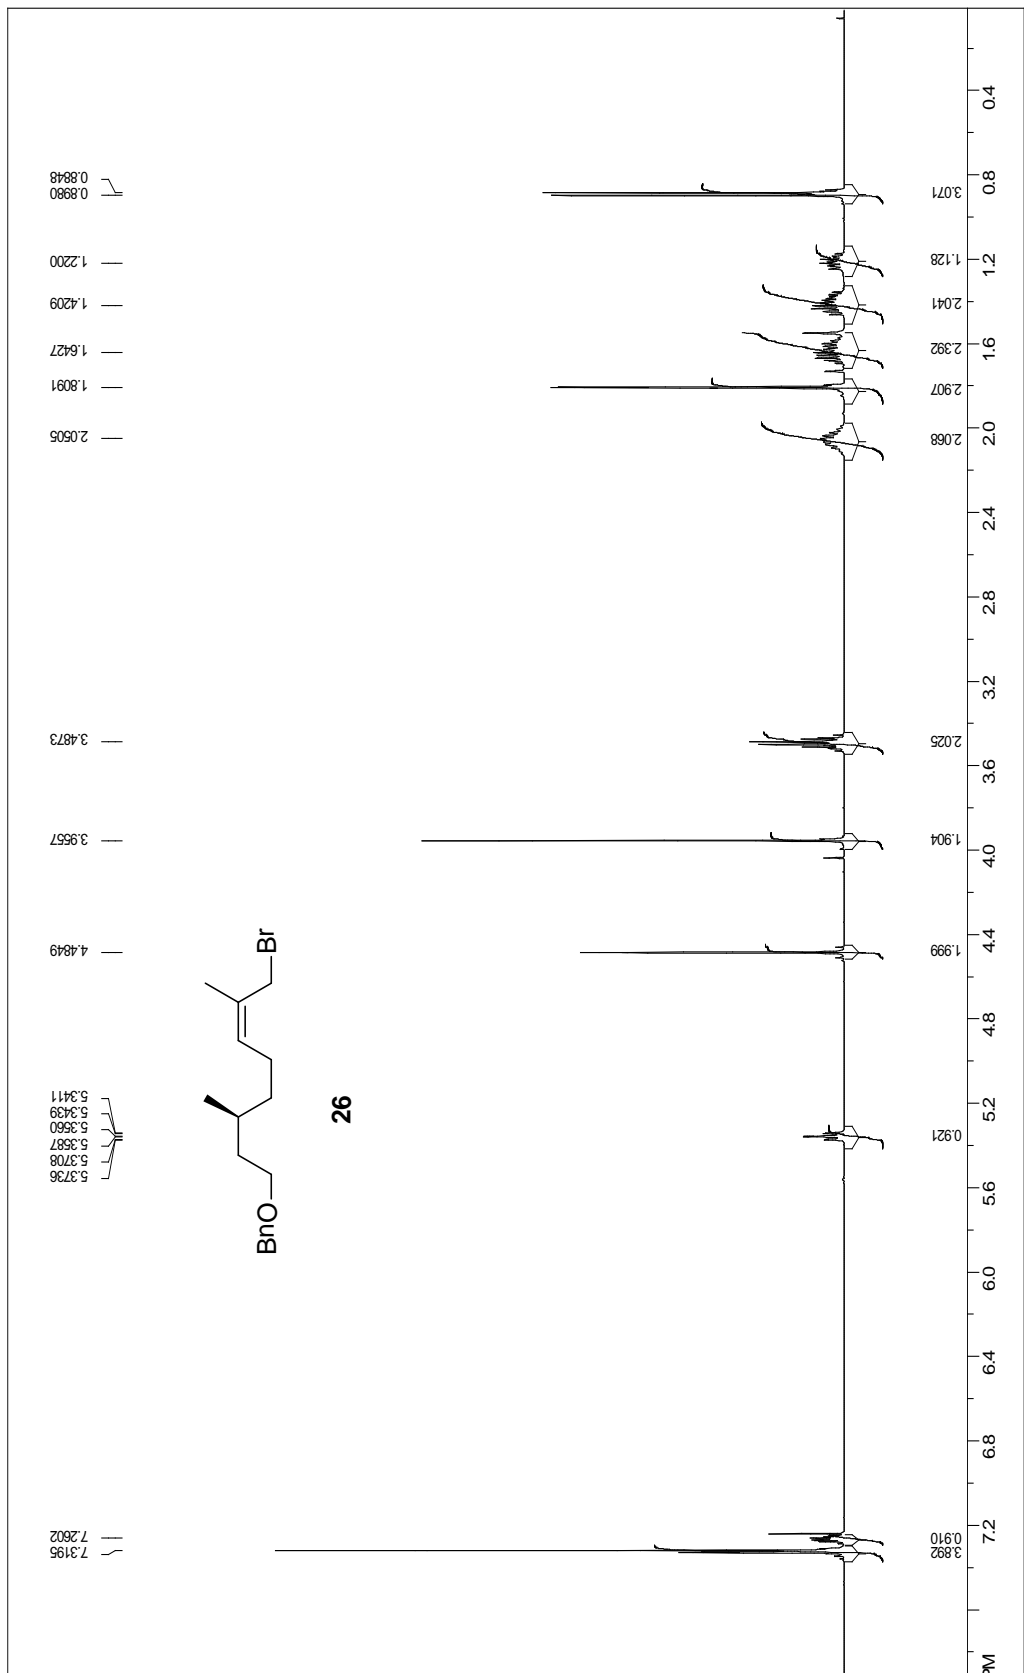

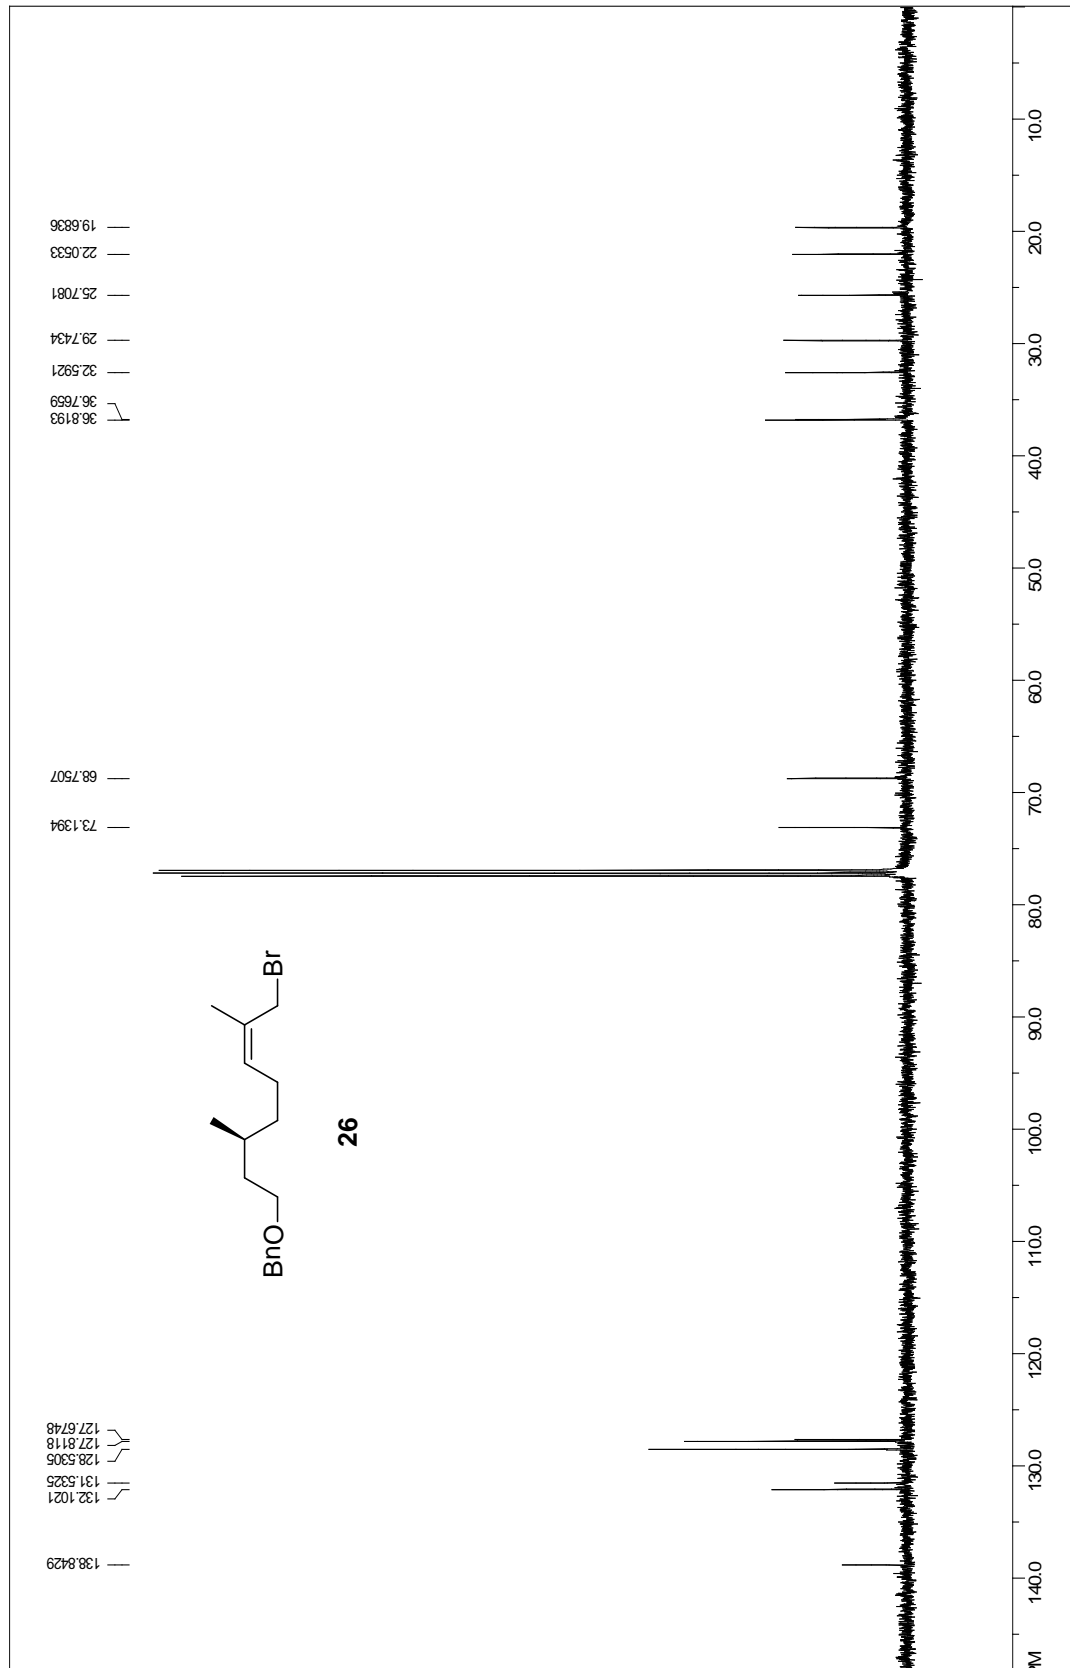

freq. of 0 ppm: 125.730105 MHz  
 processed size: 327788 complexpoints  
 LB: 1.000 GB: 0.00000

C:\Users\BWD\Desktop\Spec Data\NMR\DATA\Wzy Project\Delta1chd Derivative\Delta1chd Coupling Bromide\21id exp1 -z9g95d-  
 smiler freq.: 125.742702 MHz  
 domain size: 65536 points  
 T: 3000.031 Hz = 238.627256 ppm = 0.459222 Hz  
 bar of scans: 170

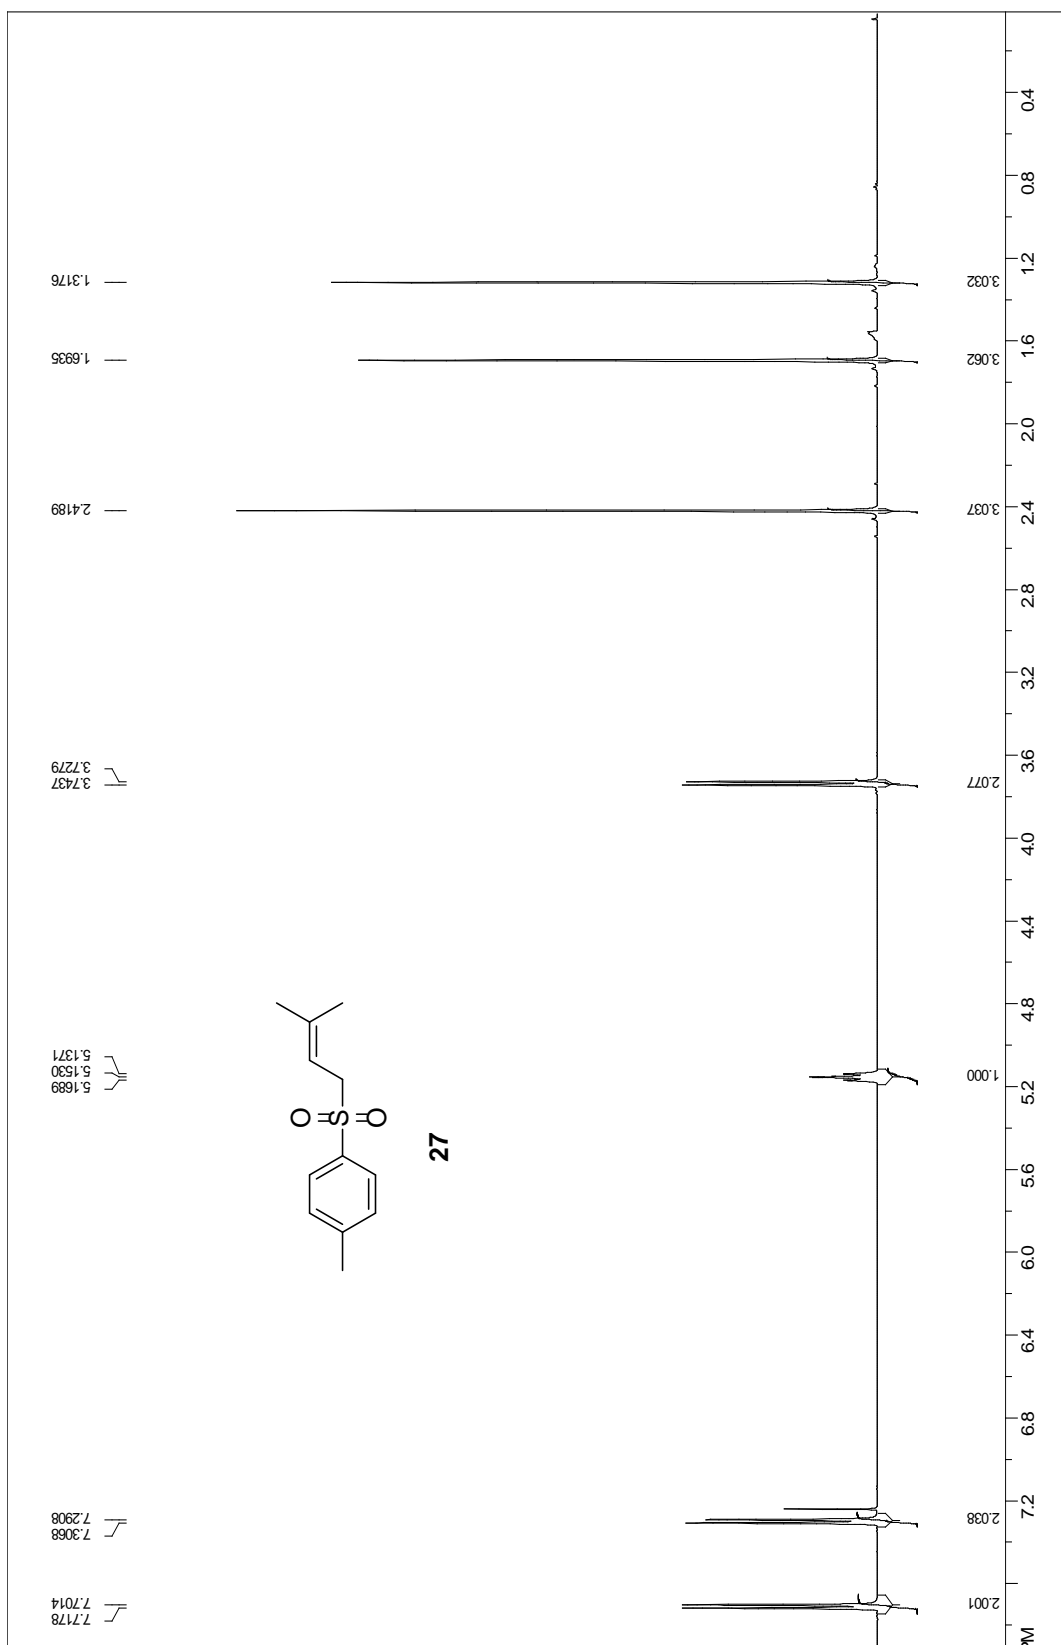

C:\Users\BVA\Desktop\Spec Data\NMR DATA\Wzy Project\NMR\111d exp1 -zgg0-  
 smiler freq.: 600.023088 MHz  
 domain size: 65536 points  
 Ir: 10350.58 Hz = 20.66203 ppm = 0.157632 Hz/pt  
 Bar of scale: 36  
 freq. of 0 ppm: 500.020021 MHz  
 processed size: 32768 complex points  
 LB: 0.300 GB 0.0000

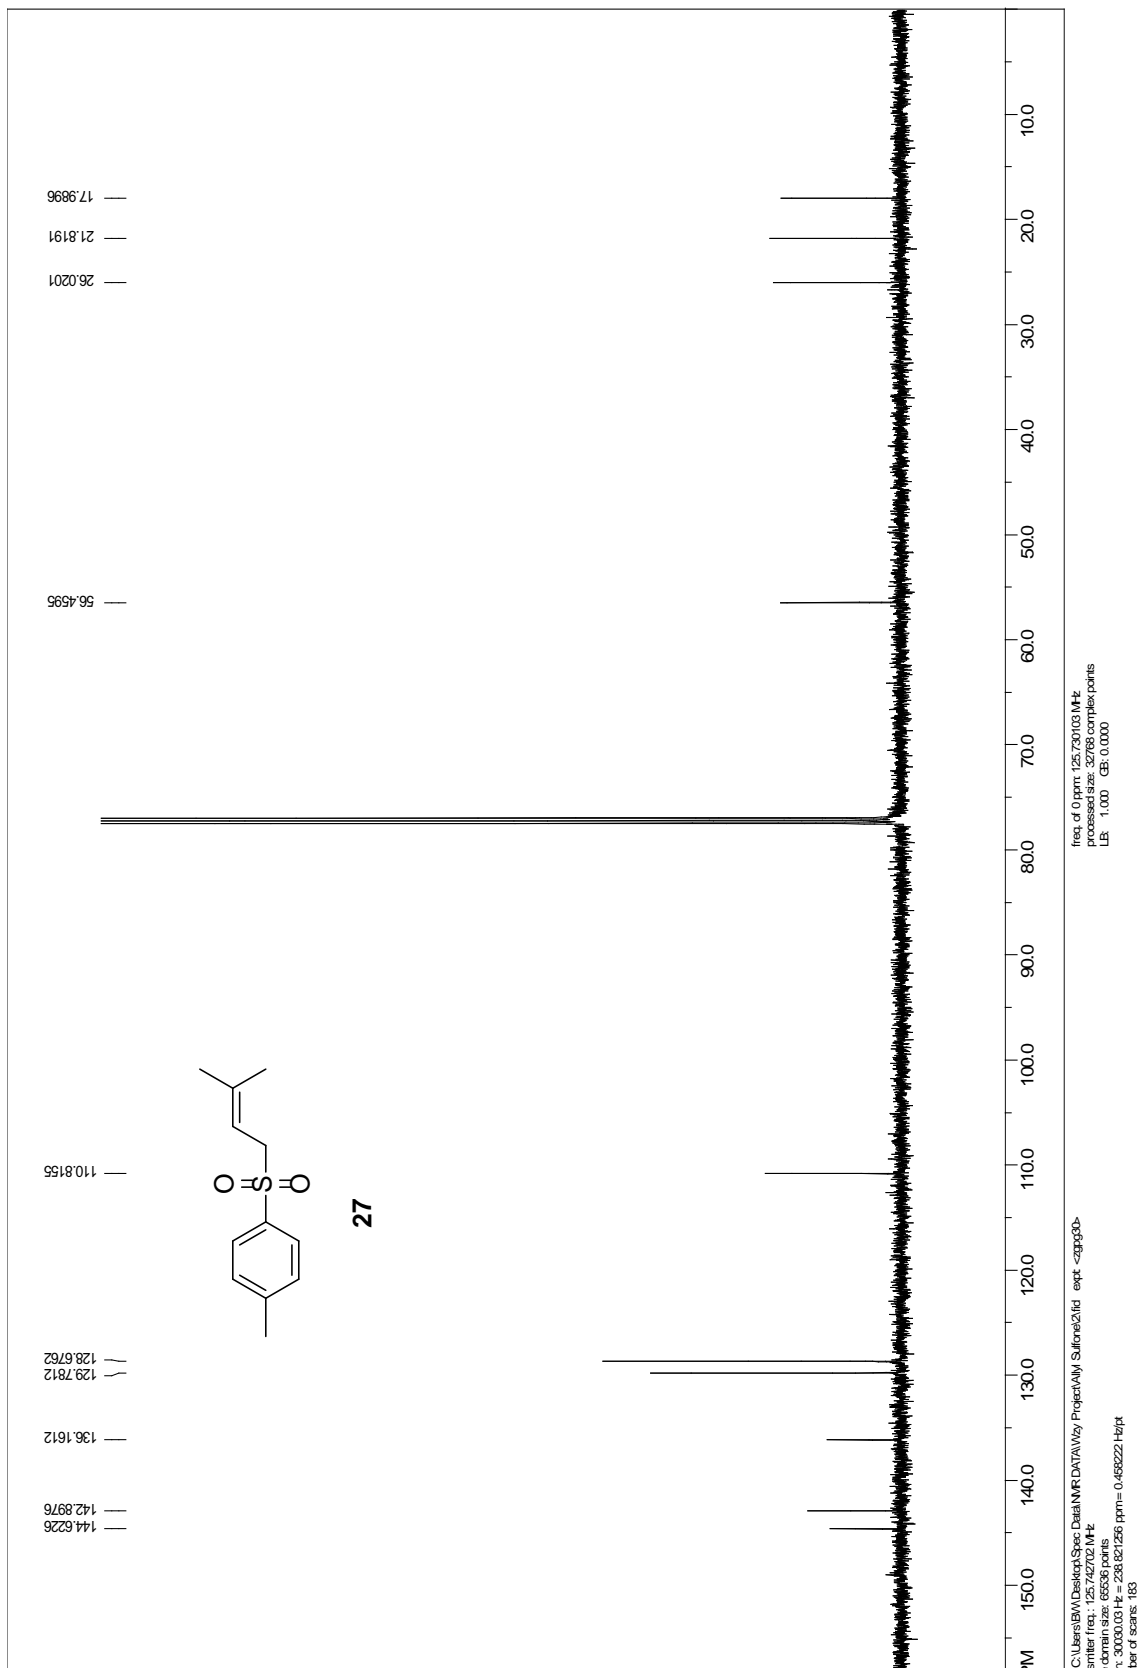

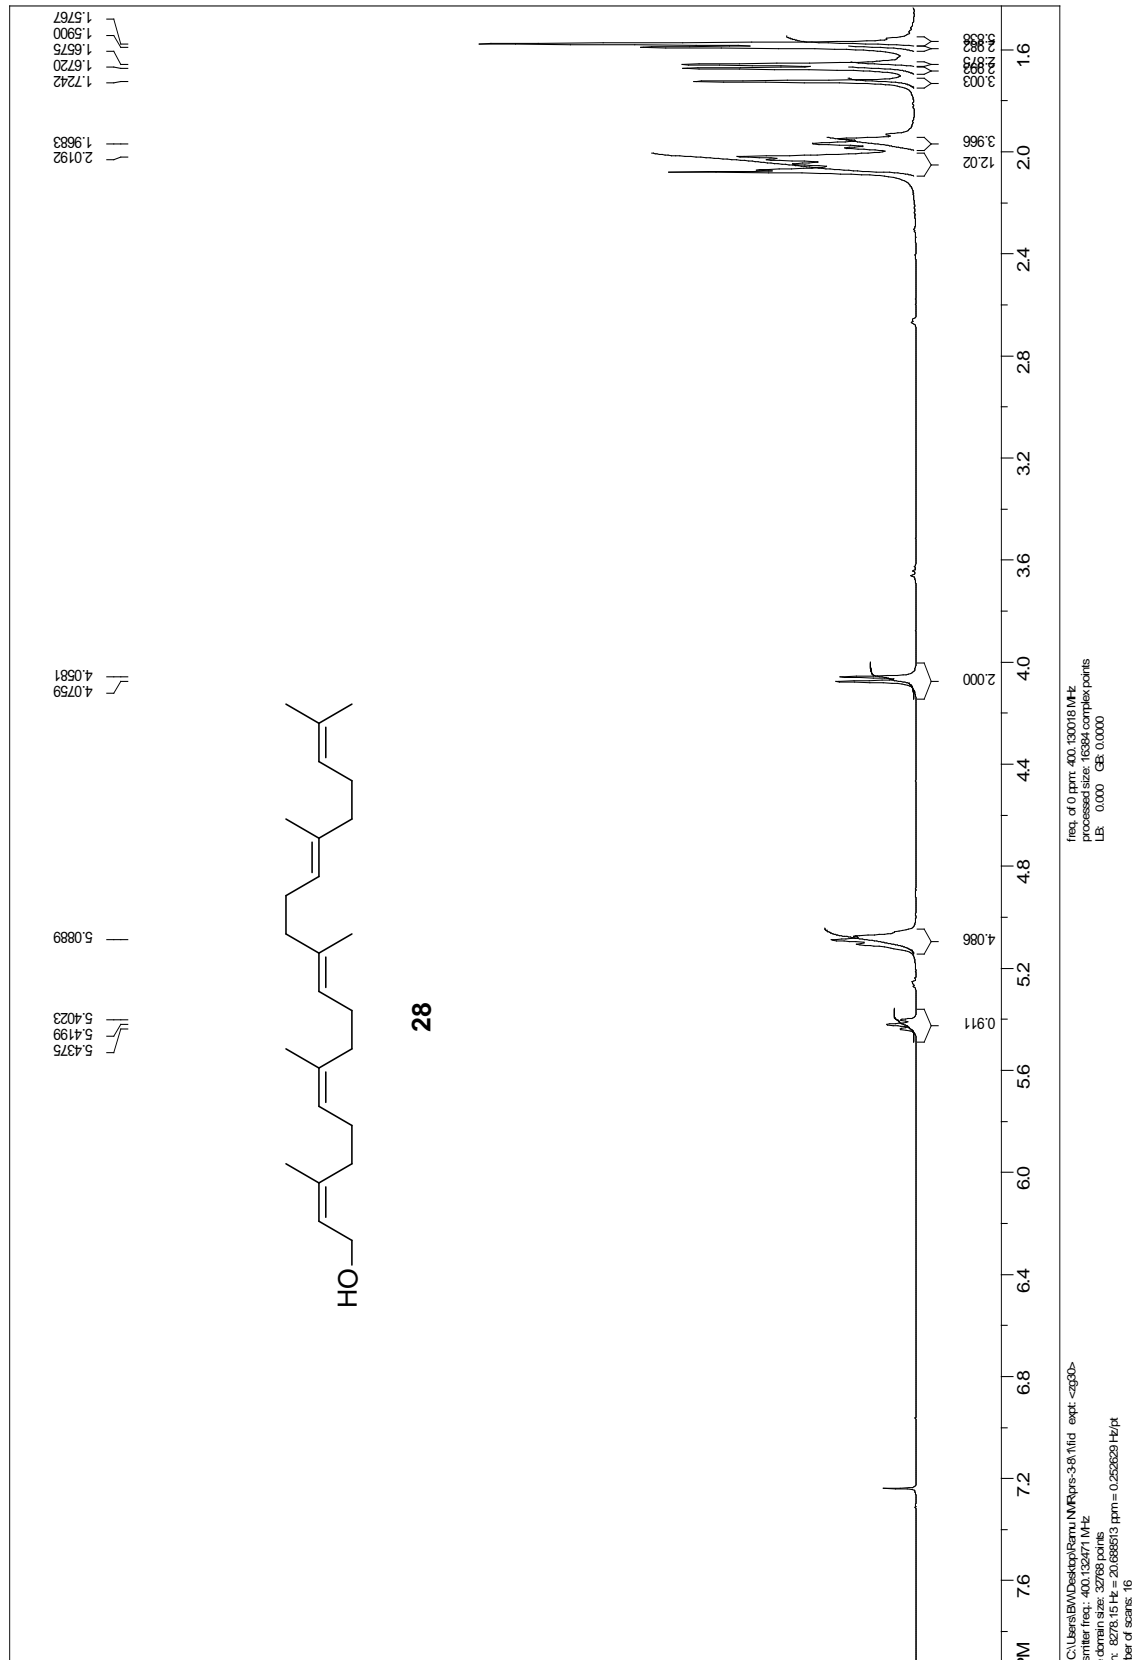

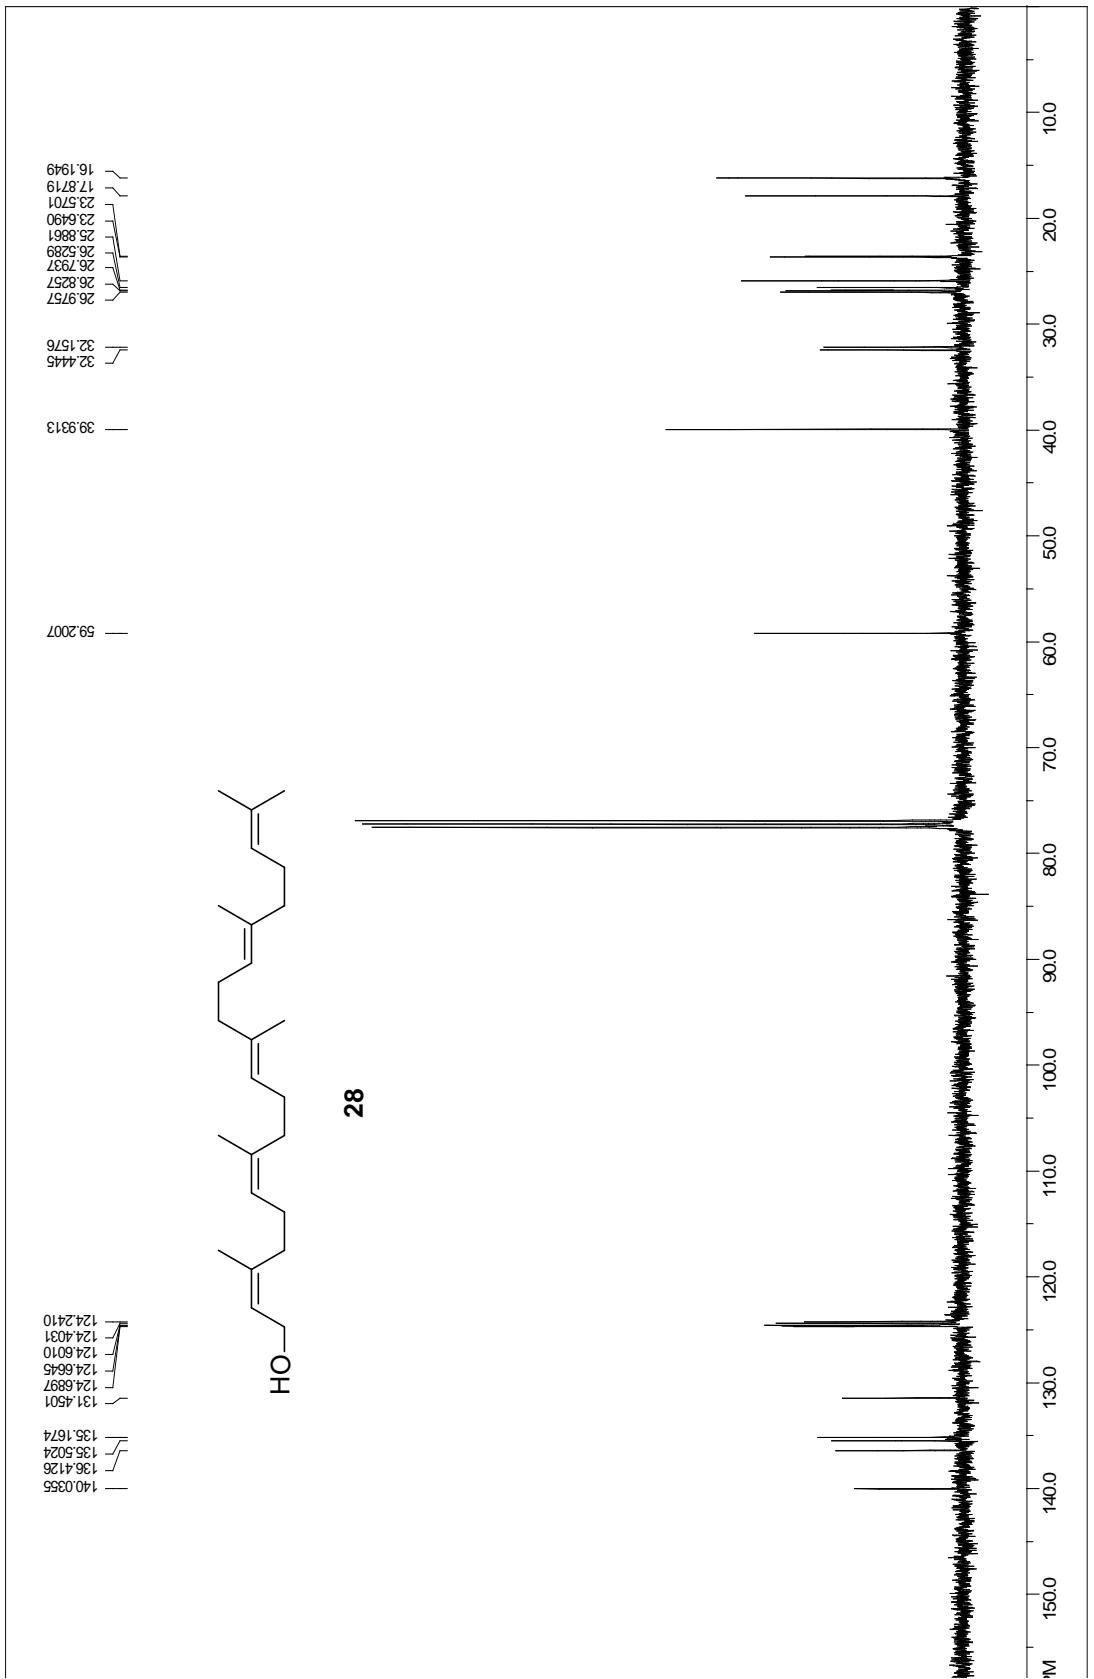

C:\Users\BVM\Desktop\p18anu\NMR\ps-3-8-21\rd\_apt\_<img>  
 -smile: 100.612748 MHz  
 -domain size: 65536 points  
 -f: 23880.02 Hz = 238.328802 ppm = 0.365161 Hz  
 -bar of scans: 160  
 freq: 0 ppm: 100.612748 MHz  
 processed size: 32768 complex points  
 LB: 1.000 GB 0.0000



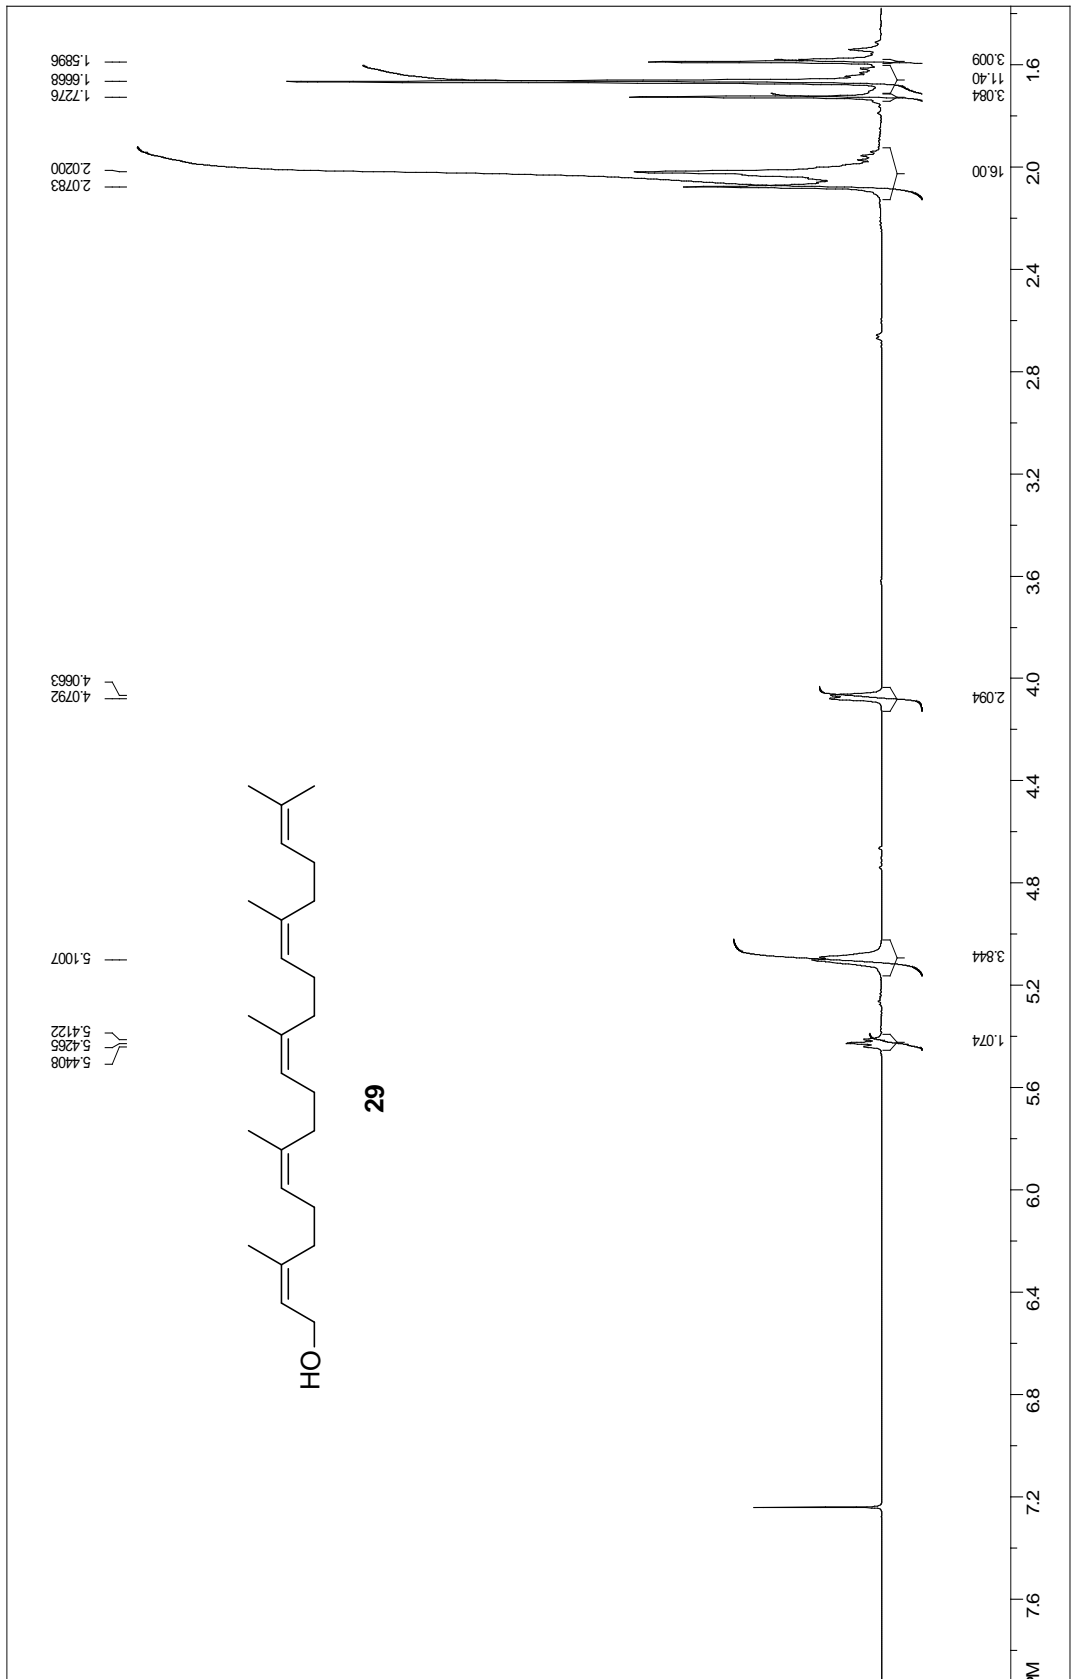

C:\Users\BAM\Desktop\Spec Data\NMR\DATA\Wzy Project\cis\Panel\1\ld exp1 - <zg00>  
 smiller (freq.: 500.022038 MHz)  
 - domain size: 65536 points  
 fr: 10330.88 Hz = 20.662003 ppm = 0.157632 Hz/pt  
 tot of scans: 16  
 freq. of 0 ppm: 500.022022 MHz  
 processed size: 32768 complex points  
 LB: 0.000 GB: 0.0000

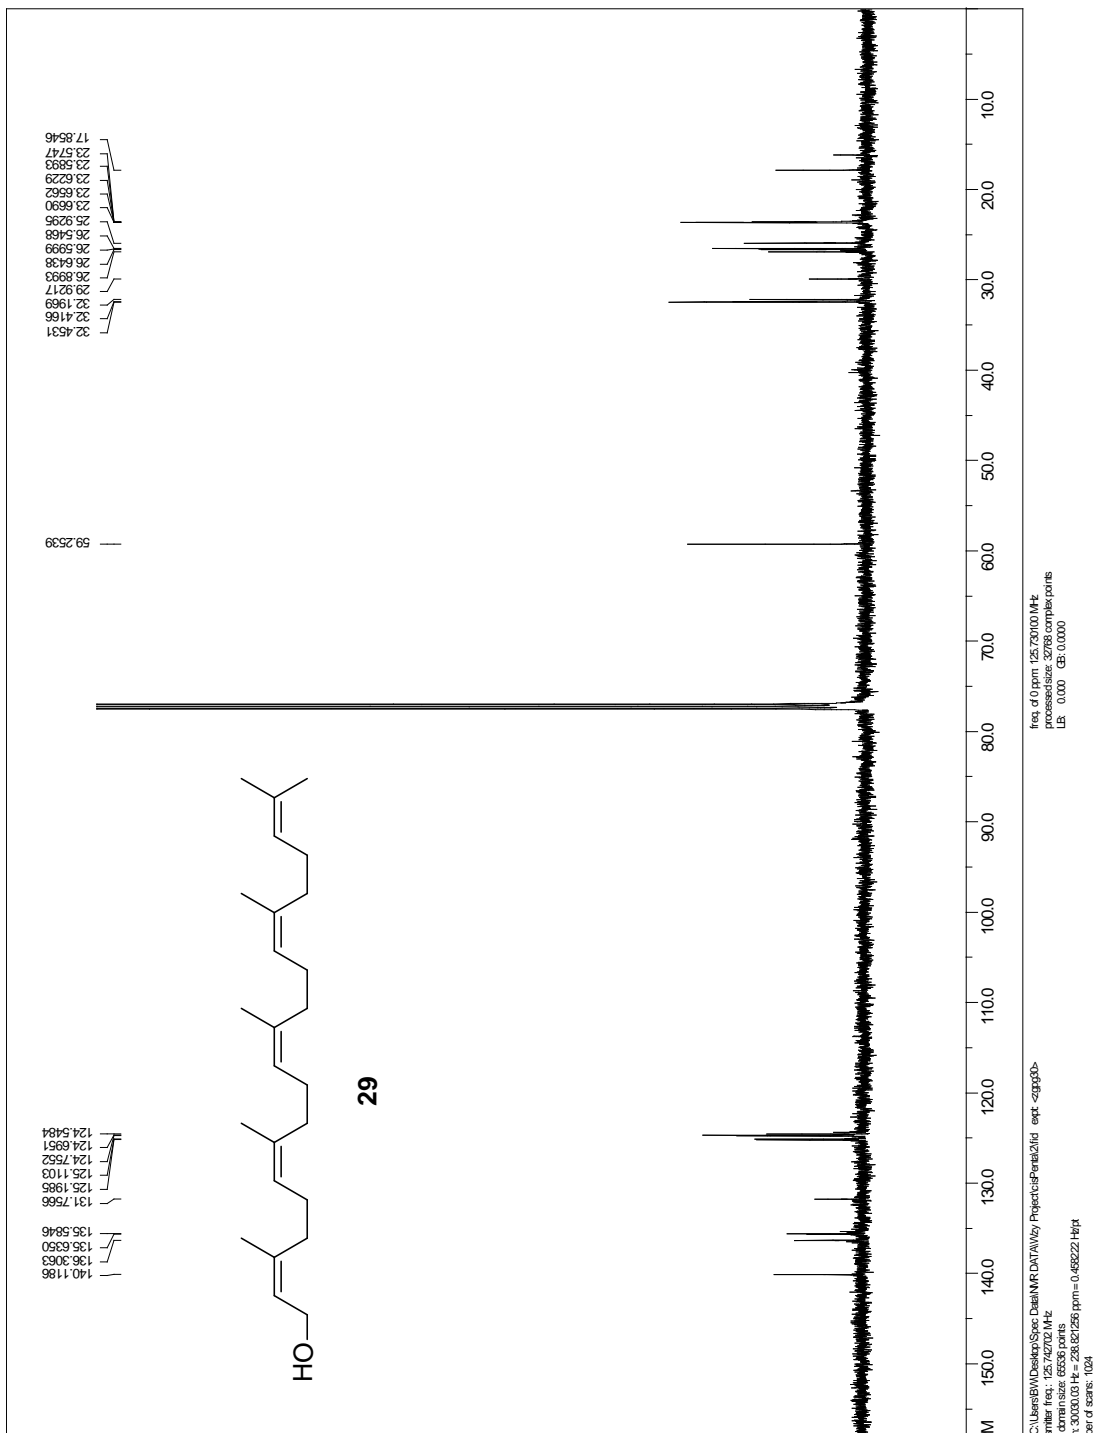

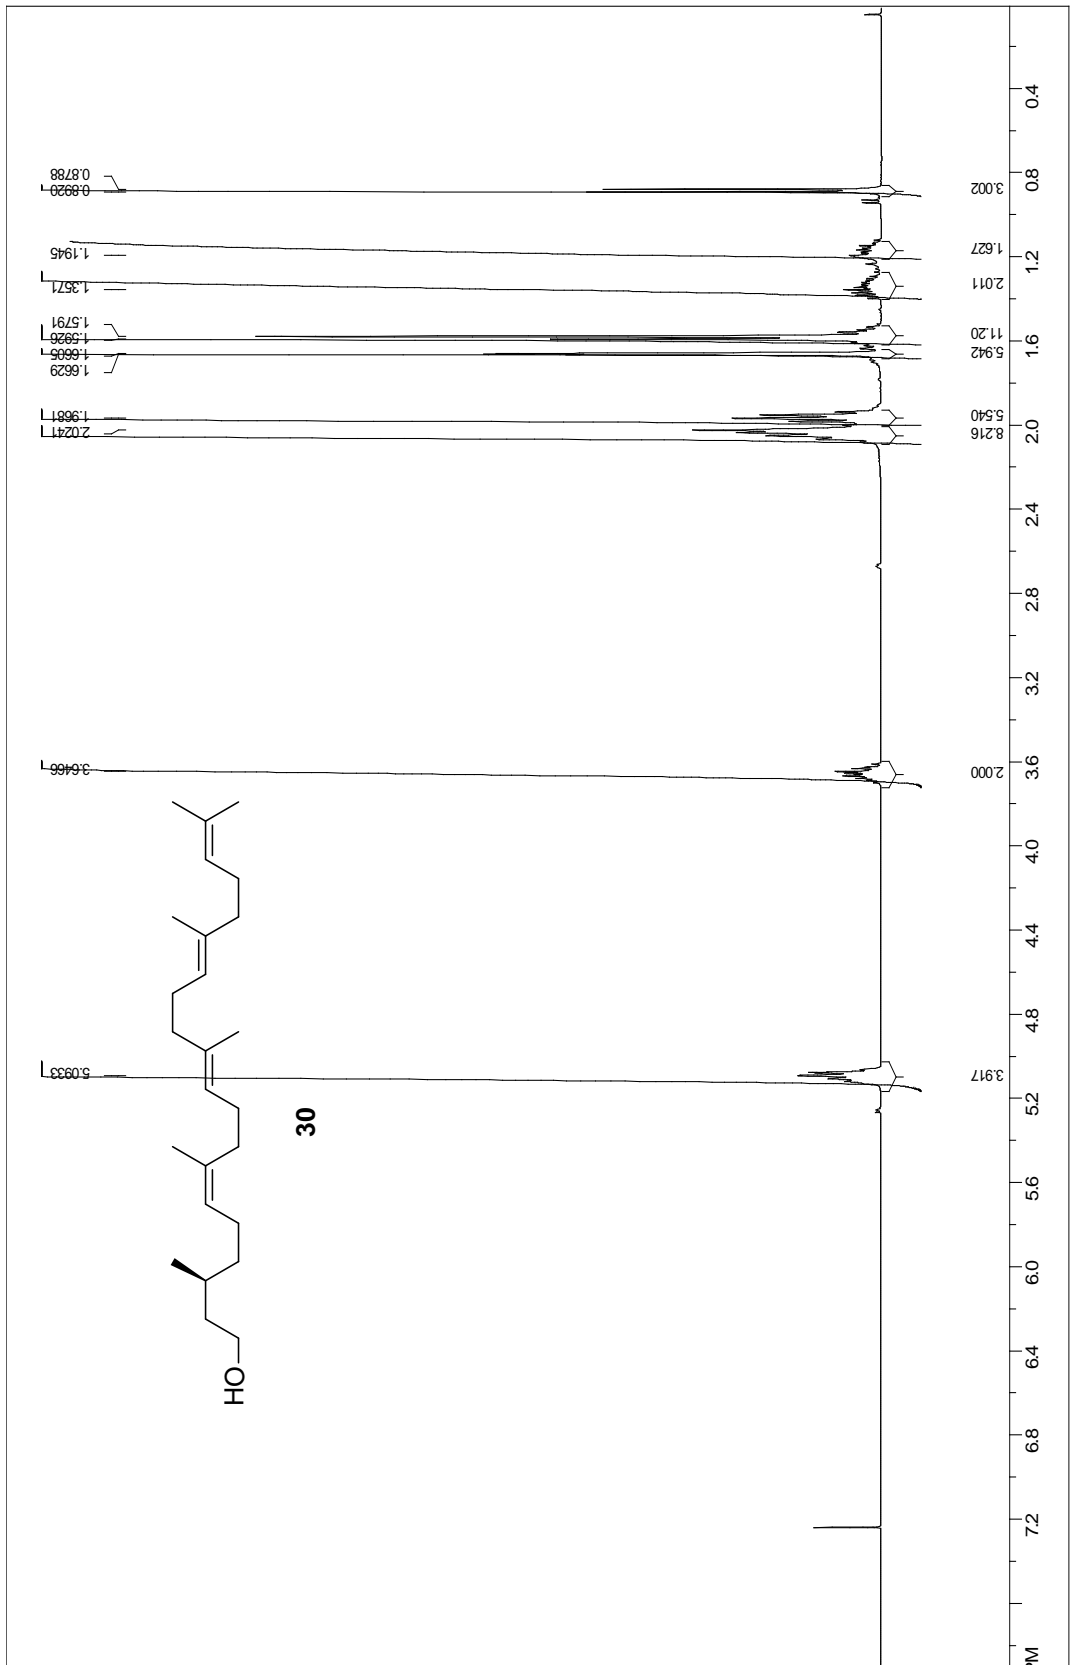

File: 01000022 MHz  
 processed size: 32768 complex points  
 LS: 0.000 GB: 0.0000

C:\Users\BMD\Desktop\Spec Data\NMR DATA\Way Project\Baldich\Derivative(S)-(-)-MS-Pentiprenol\1\fid exp1 <2>g30>  
 smiter freq: 500.022000 MHz  
 65530 points  
 101800.591 Hz 21.000000 ppm = 0.157652 Hz/pt  
 bar of scans: 1/28

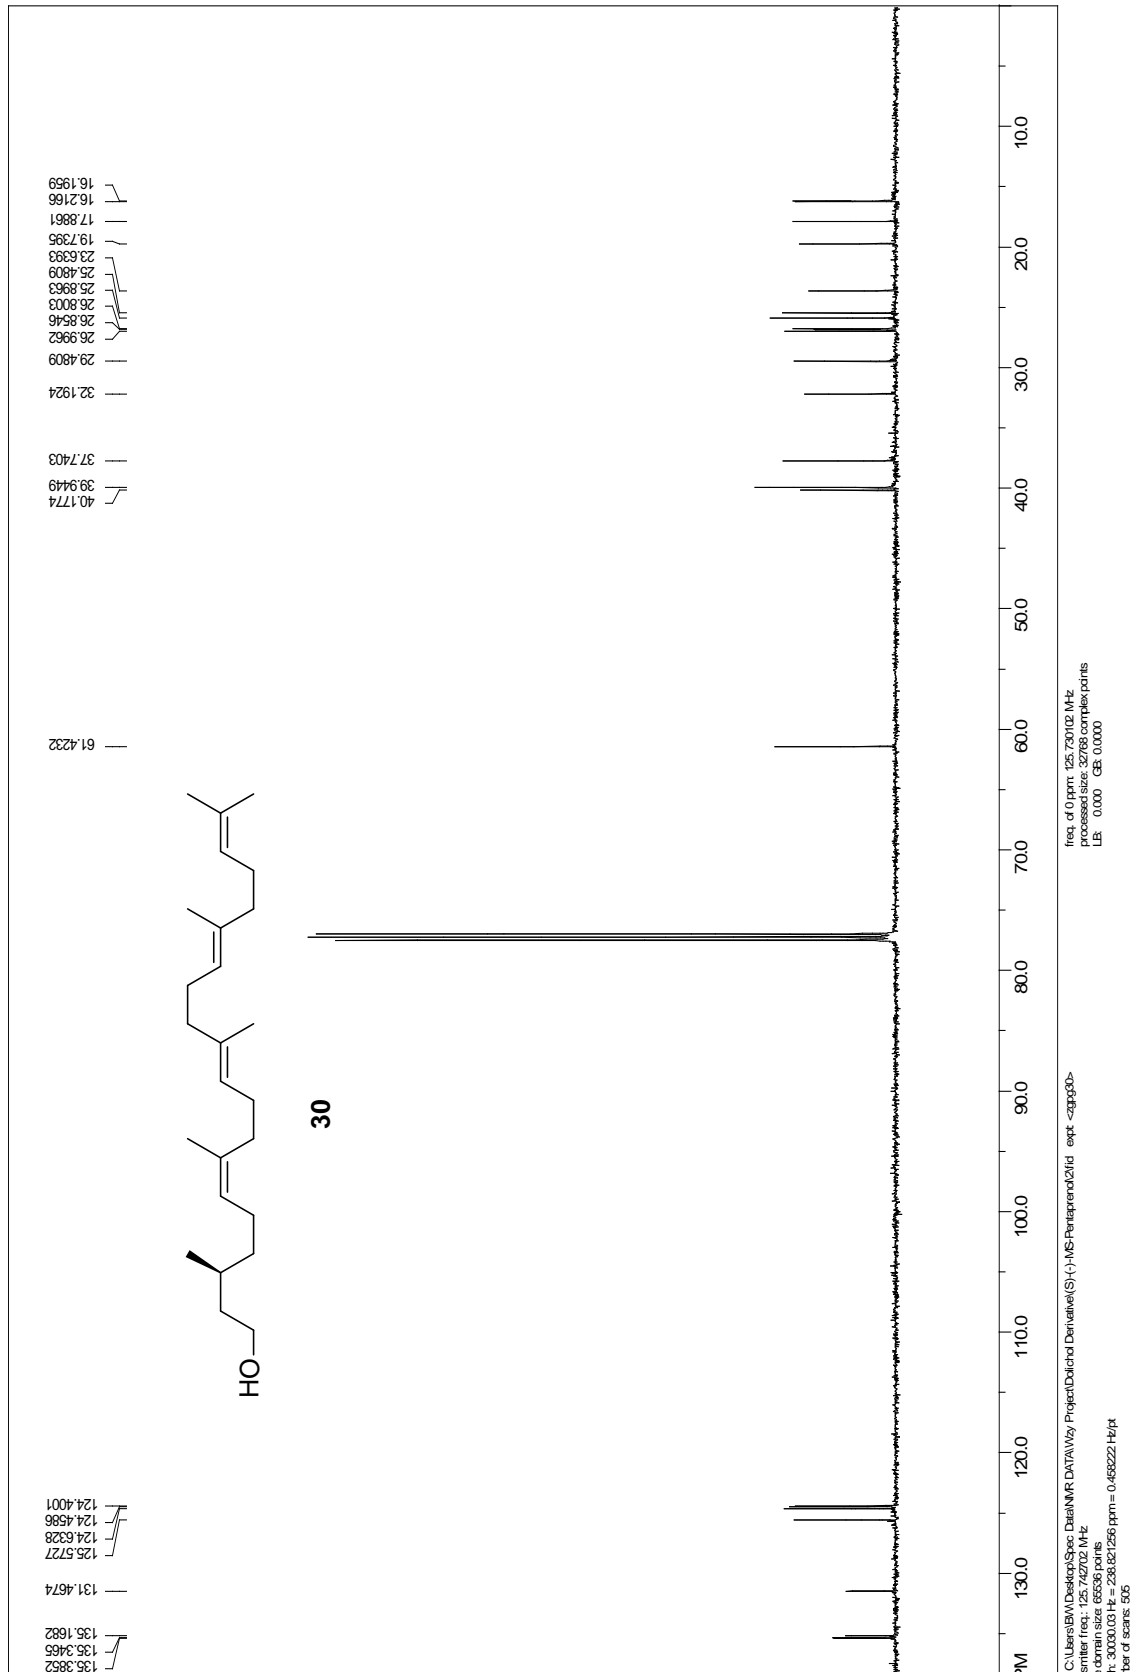

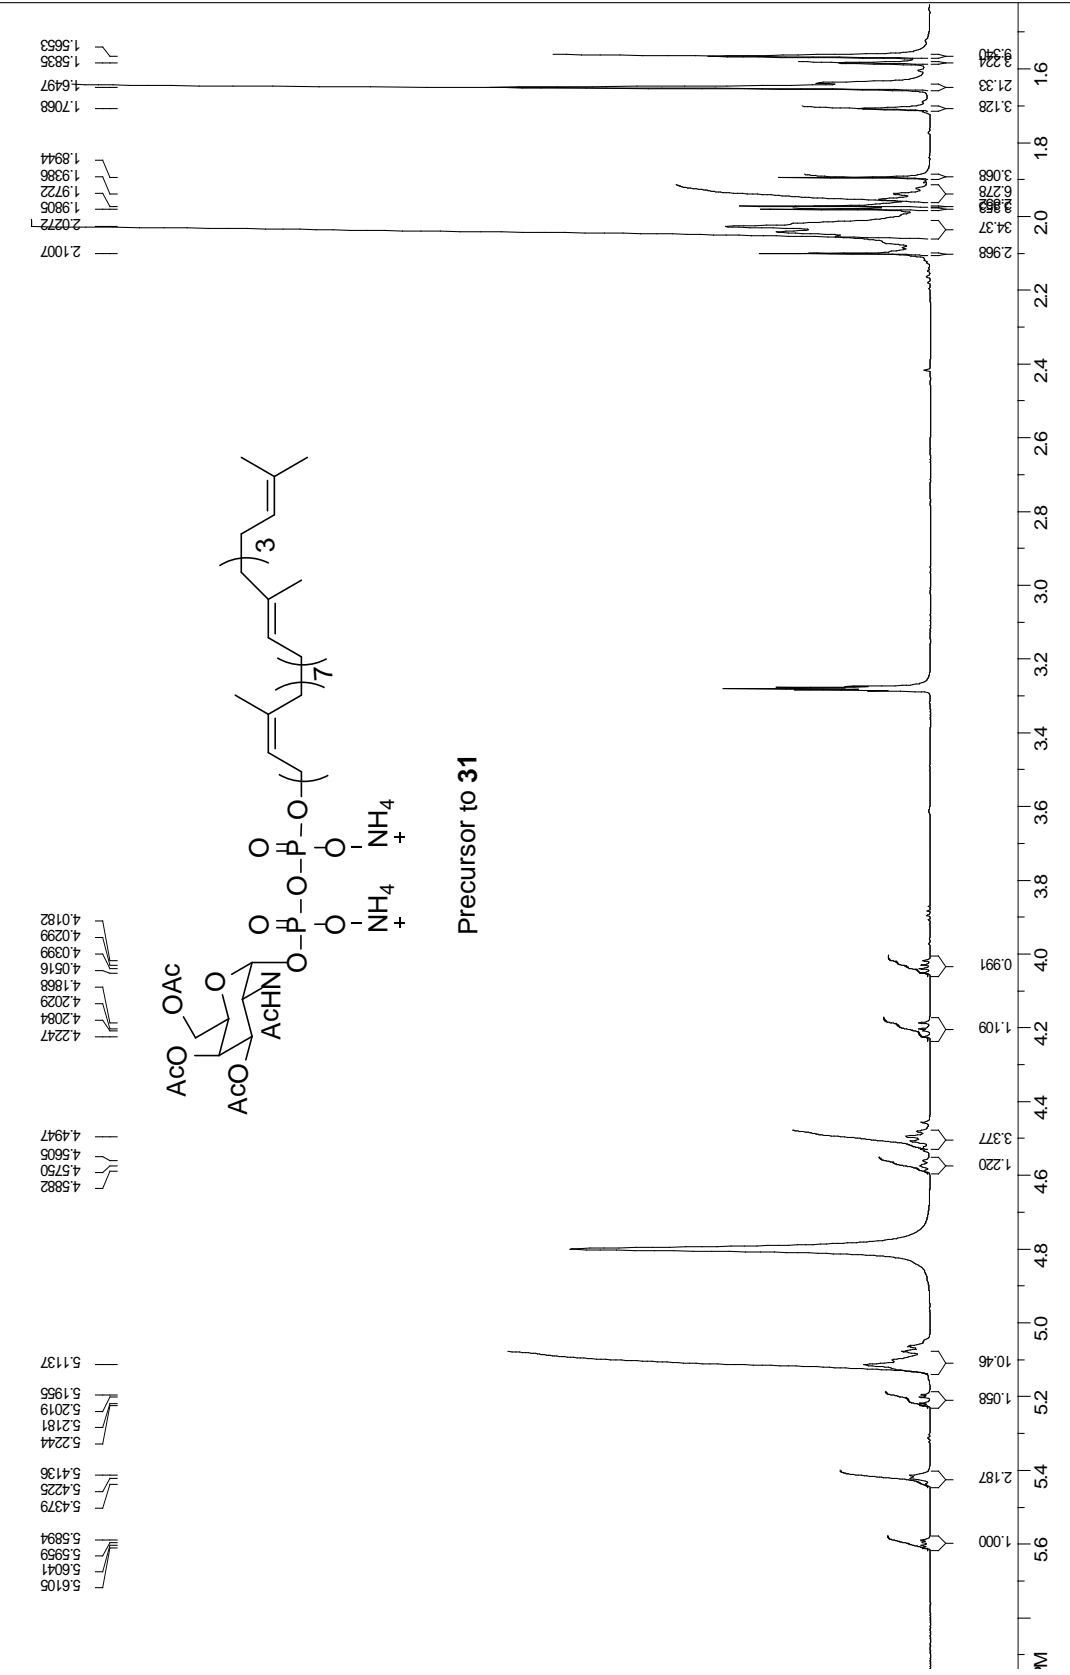

freq. of 0 ppm: 500.000204 MHz  
processed size: 32788 complex points  
LB: 0.000 GB: 0.0000

MACOSY-PR1.tic1.tif, exp: <g>  
acifur freq.: 500.020388 MHz  
domain size: 65536 points  
gamma: 10030.59 Hz = 20.662023 ppm = 0.157632 Hz/pt  
bar of scans: 64

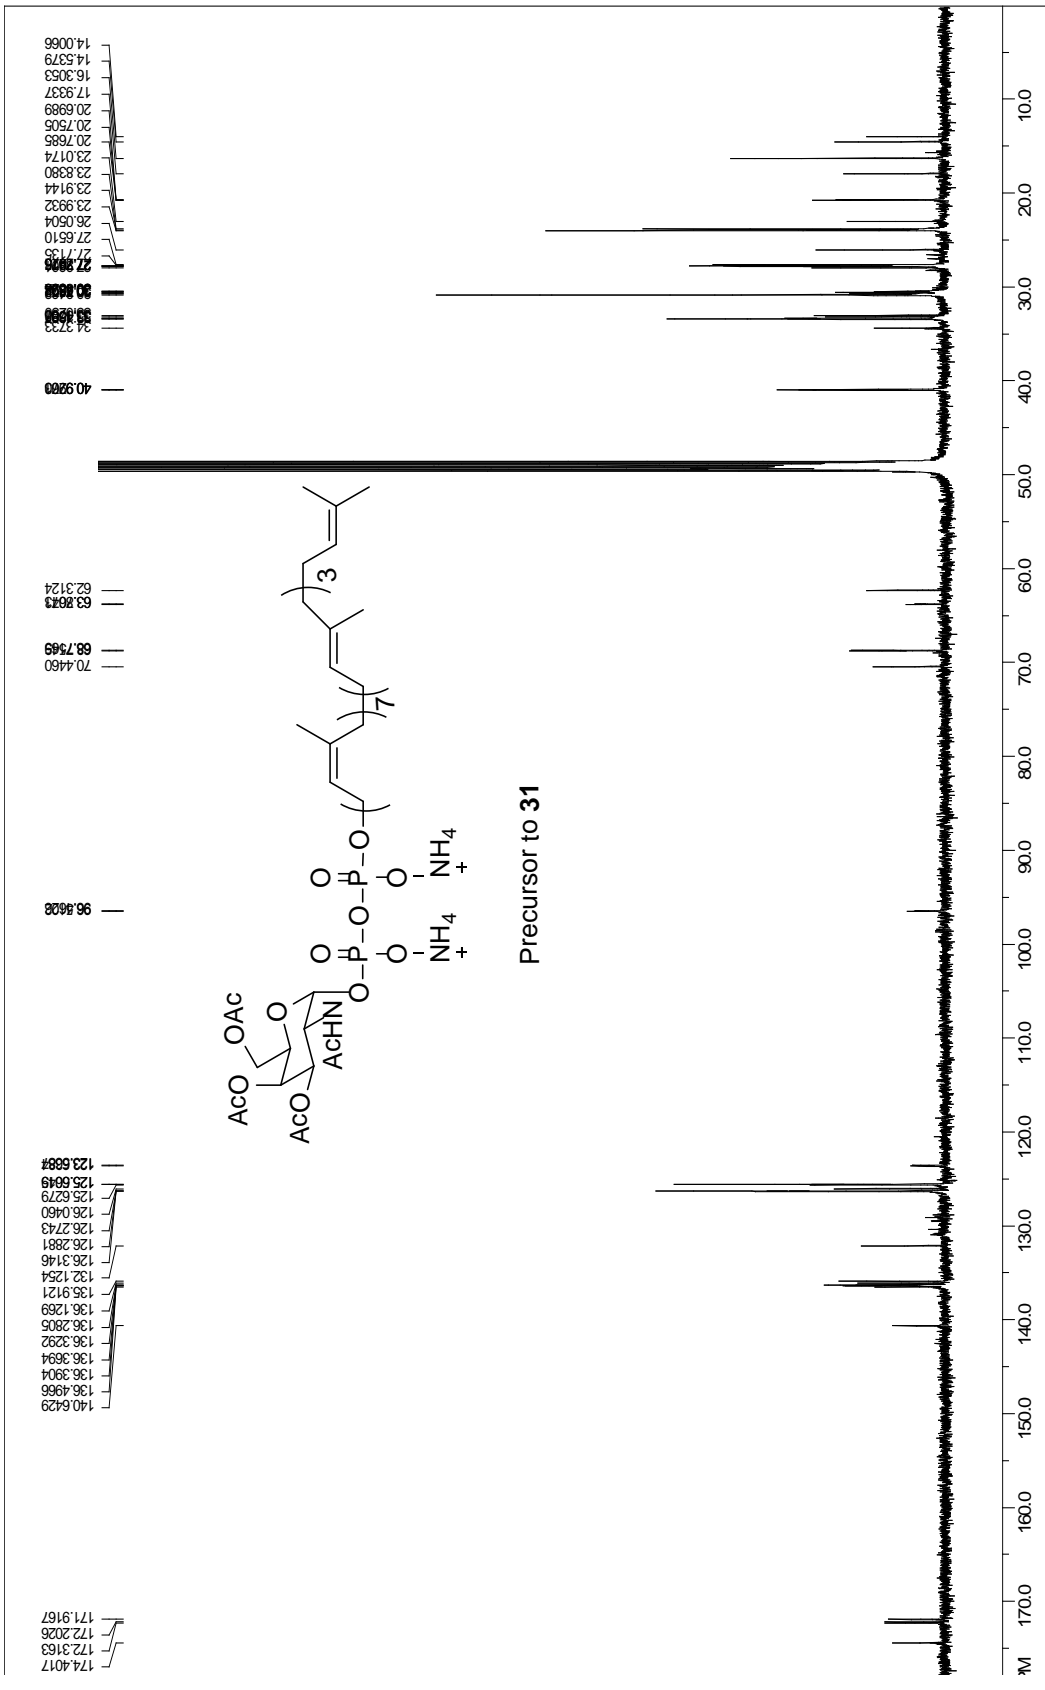

J:\AccG\1\NMR\1257252\2\data exp1 ->3pp030-  
 emitter freq.: 125.742702 MHz  
 domain size: 65536 points  
 time resolution: 0.2821250 ppm = 0.455222 Hz  
 bar of scales: 15086

freq. of 0 ppm: 125.725839 MHz  
 processed size: 32768 complex points  
 LB: 1.000 GB 0.0000

-12.6260  
 -9.6206  
 -9.7581

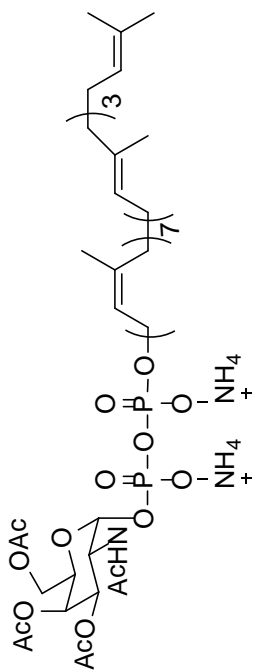

Precursor to **31**

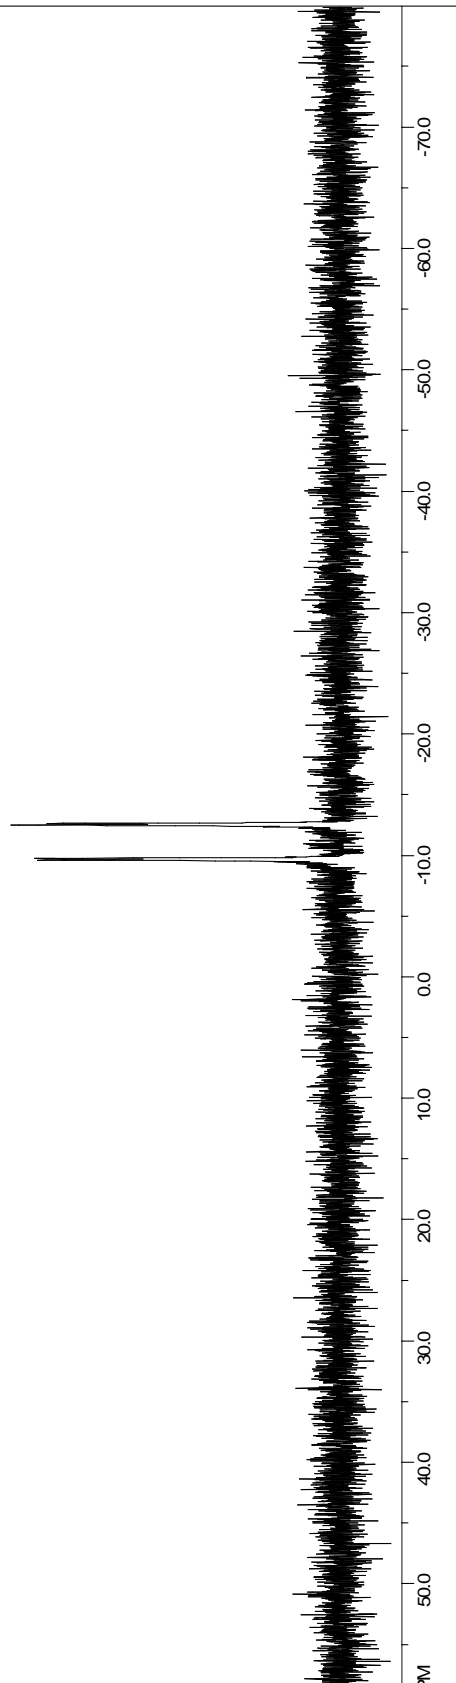

J:\Gait\NMR\1h\PC\res\1h1.f exp: <agg33>  
 Date\_ Acq: 20130714  
 Chem: 31  
 Chem: 31  
 Conv: 1000 Hz = 400.914228 ppm = 0.9800630 Hz  
 Num of scans: 728

freq. of 0 ppm: 61.975488 MHz  
 Processed: 20130714  
 Gain: 1.000 GB 0.0000

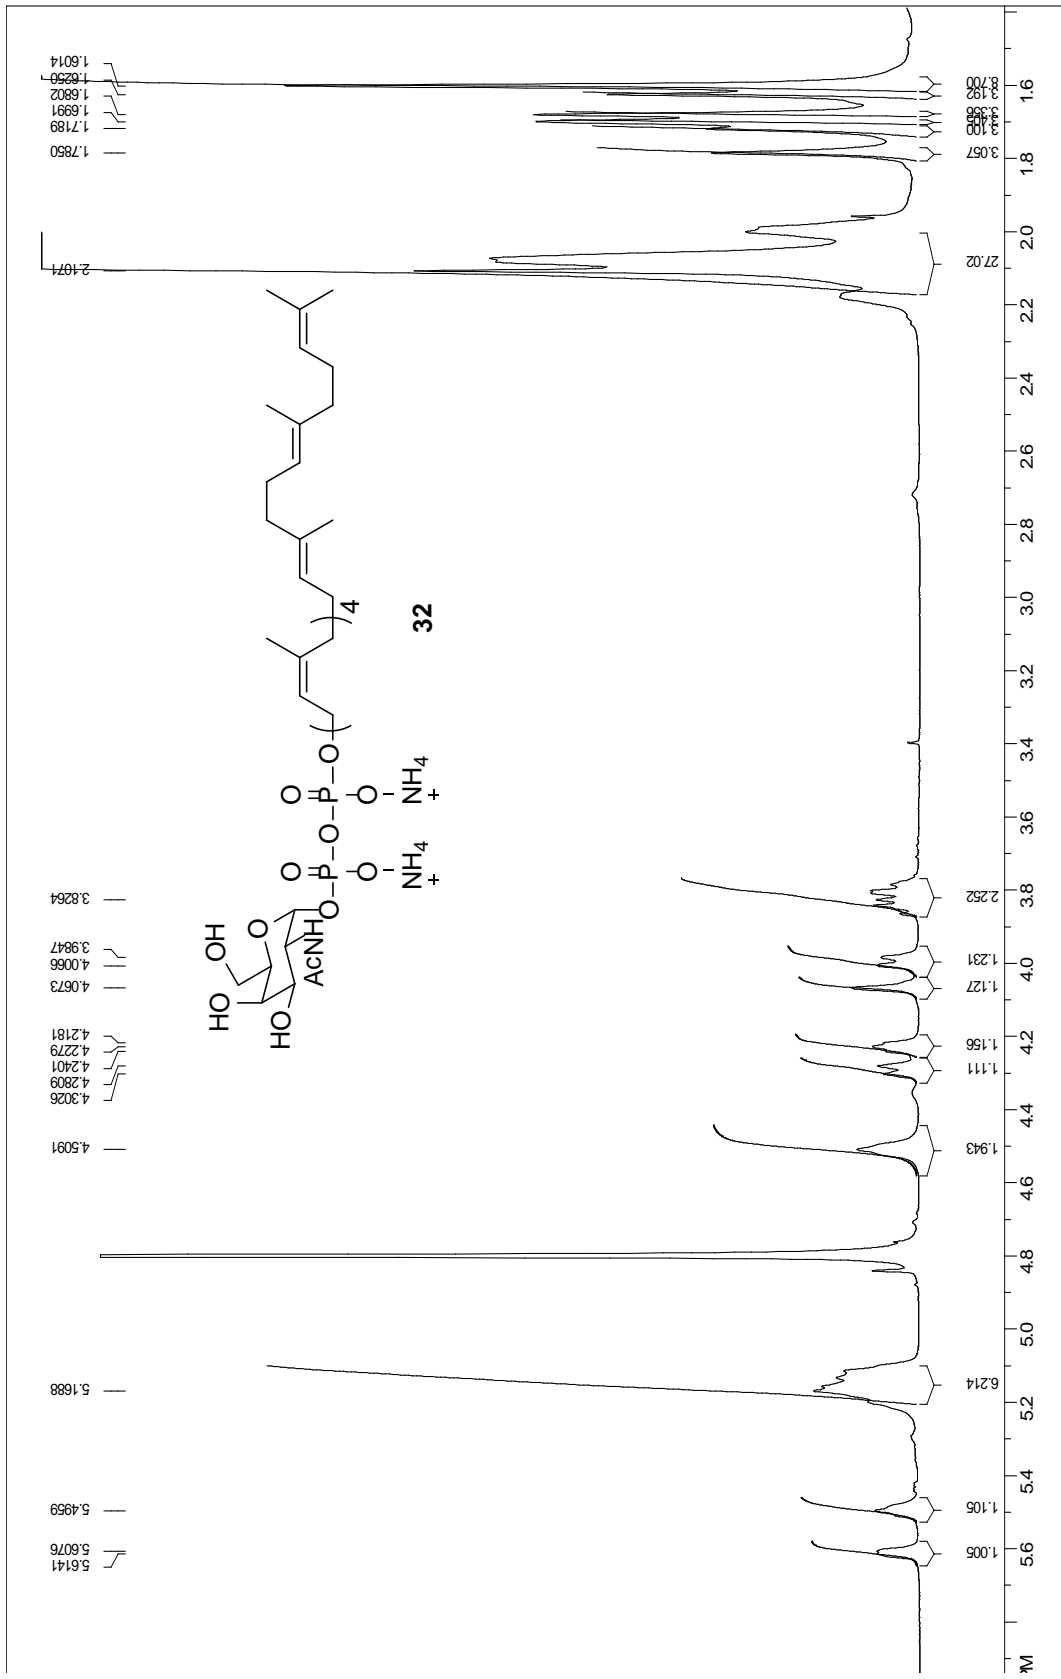

C:\Users\BMD\Desktop\Spec Data\NMR\DATA\Wzy Project\GAIN\CPPT\Hpt2\1161 exp1 <3g30>  
 smilar freq.: 500.132069 MHz  
 domain size: 65536 points  
 ft: 10330.59 Hz = 20.662003 ppm = 0.157632 Hz/pt  
 no. of scans: 64  
 LB: 0.000 GB: 0.0000  
 processed size: 32788 complex points  
 freq.: 410 ppm: 500.132069 MHz



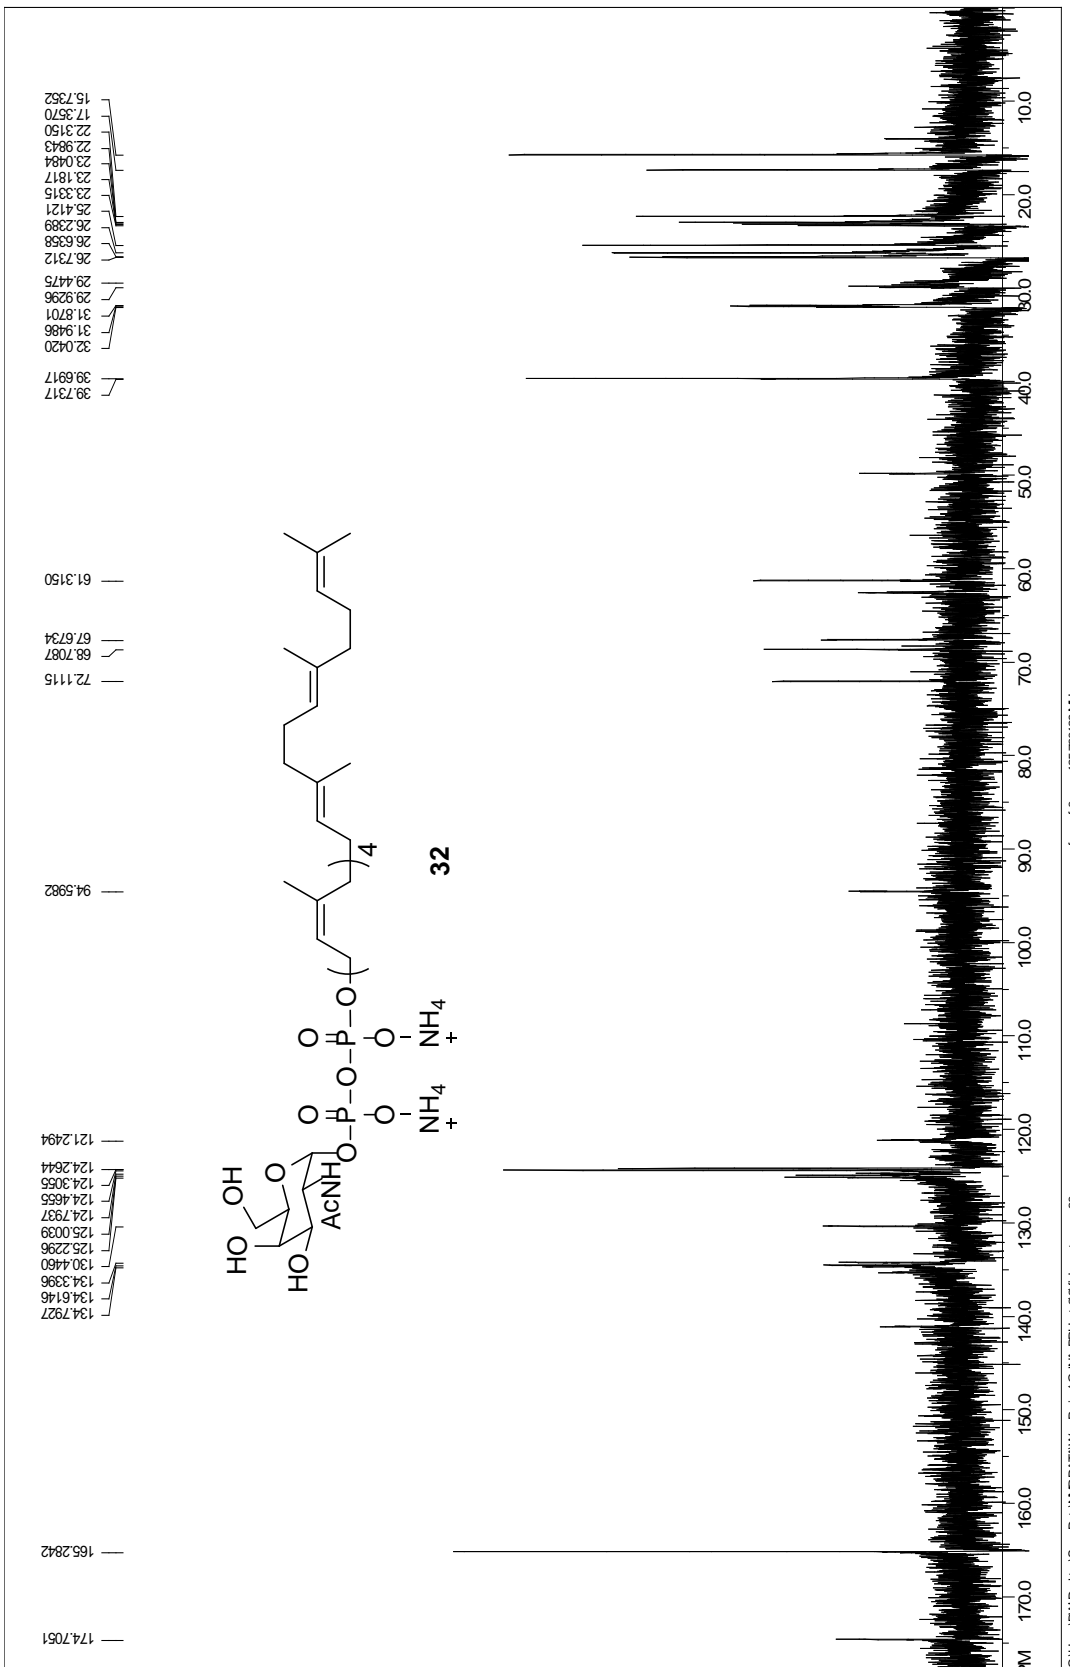

freq. of 0 ppm: 125.730125 MHz  
 processed size: 32788 complex points  
 LB: 0.000 GB: 0.0000

C:\Users\BWI\Desktop\Spec Data\NMR\DATA\Wzy Project\Gal\GalMcPFP\pp2\21\fid\_esp1--ppg30-  
 smiter freq.: 125.742702 MHz  
 domain size: 65536 points  
 x: 30000.03 Hz = 238.821256 ppm = 0.458222 Hz/pt  
 ber of scans: 12505

-9.7064  
 -11.4192  
 -11.4783

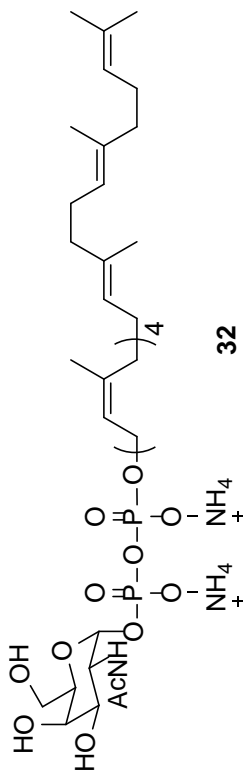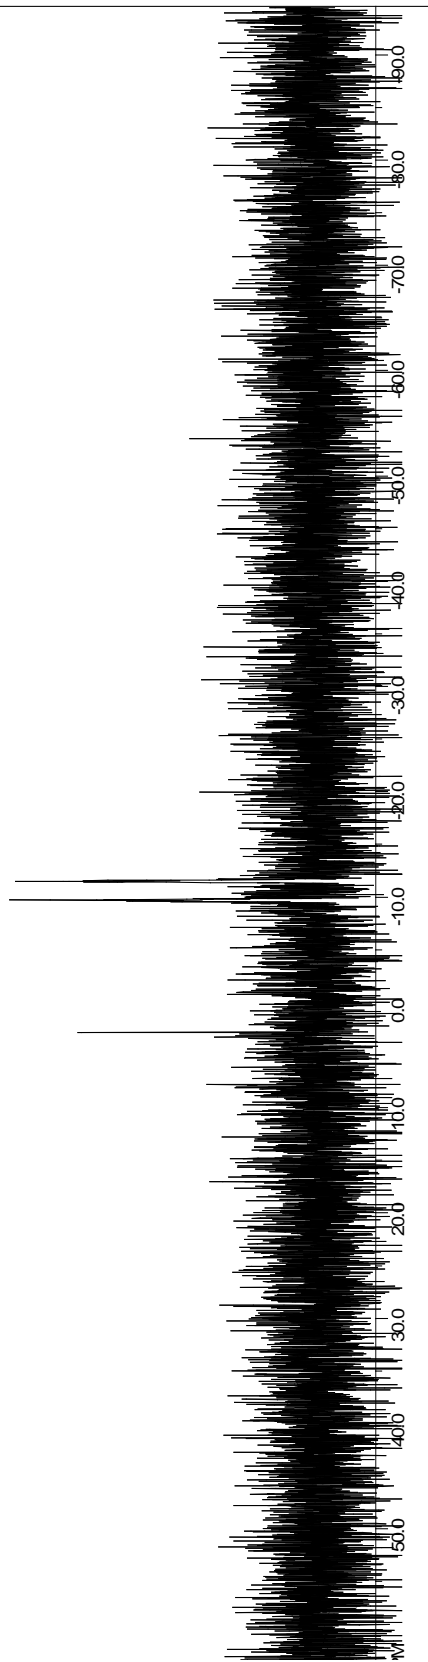

J:\Galk\NCP\Phos\1\vid exp1 <agg3>  
 31P NMR  
 161.562774 MHz  
 32768 complex points  
 1.000 GB 0.0000

J:\Galk\NCP\Phos\1\vid exp1 <agg3>  
 31P NMR  
 161.562774 MHz  
 32768 complex points  
 1.000 GB 0.0000

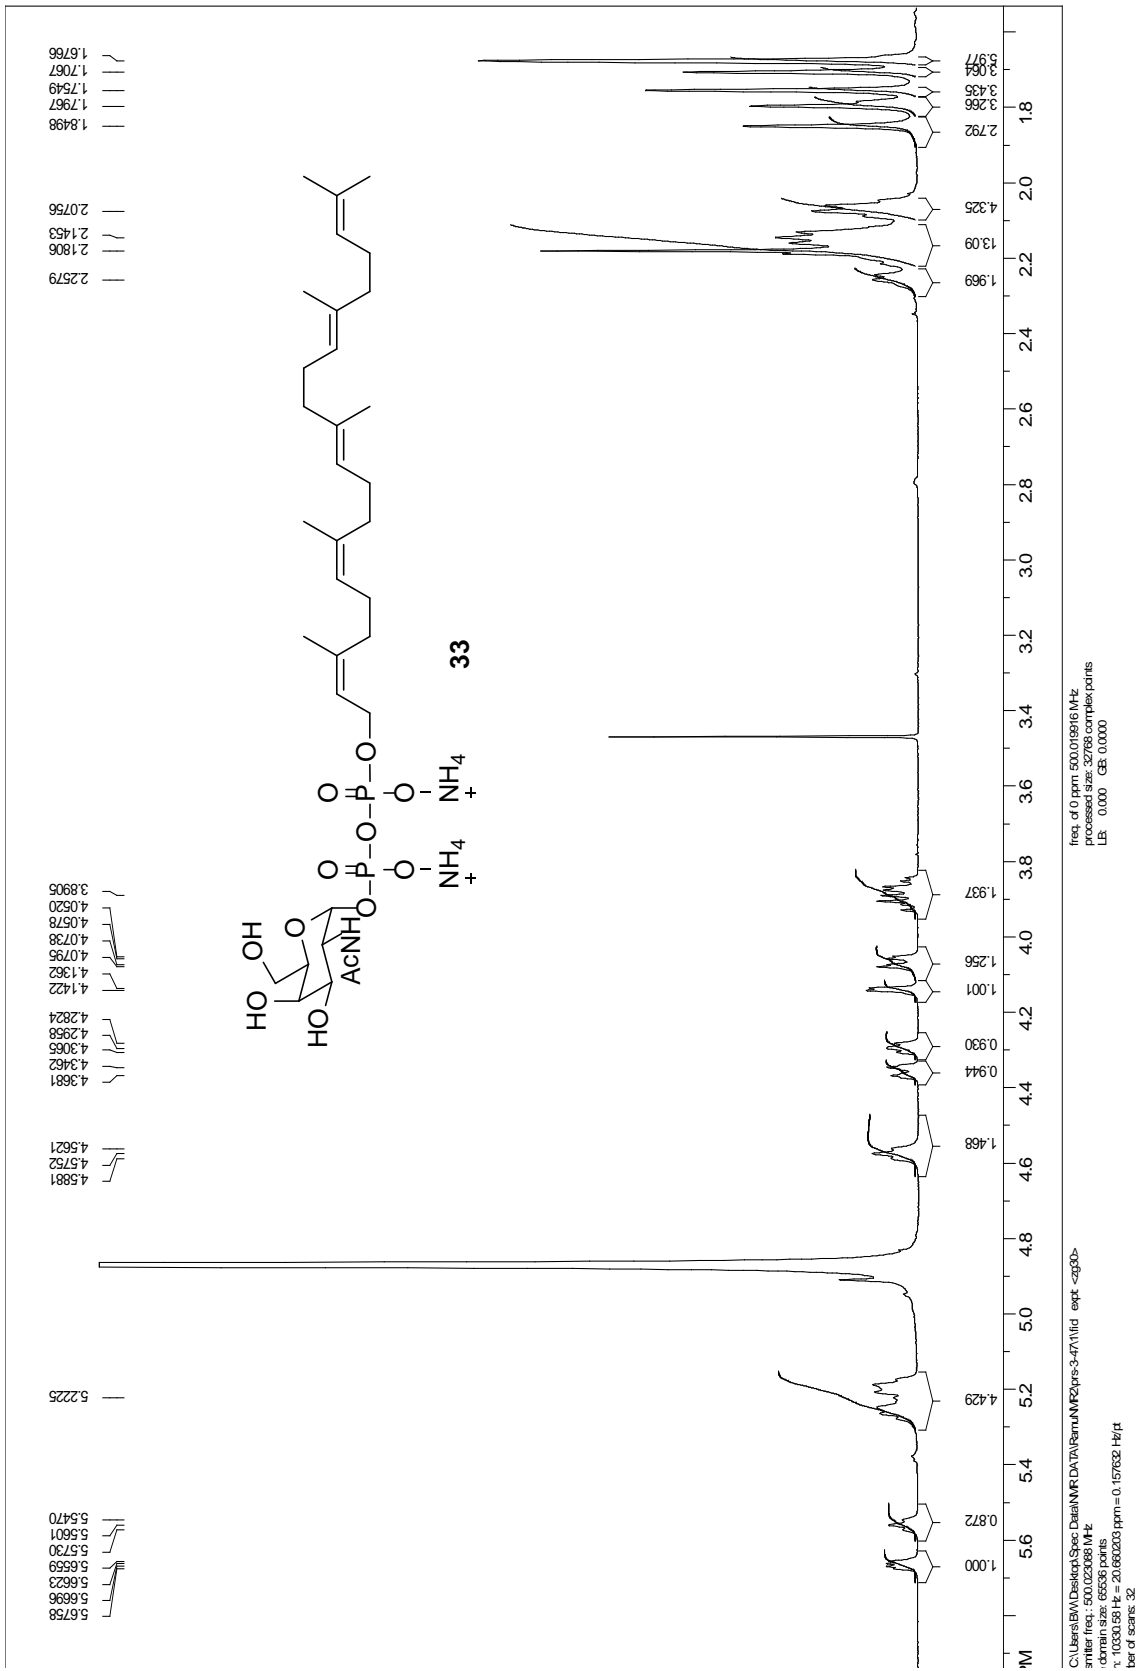

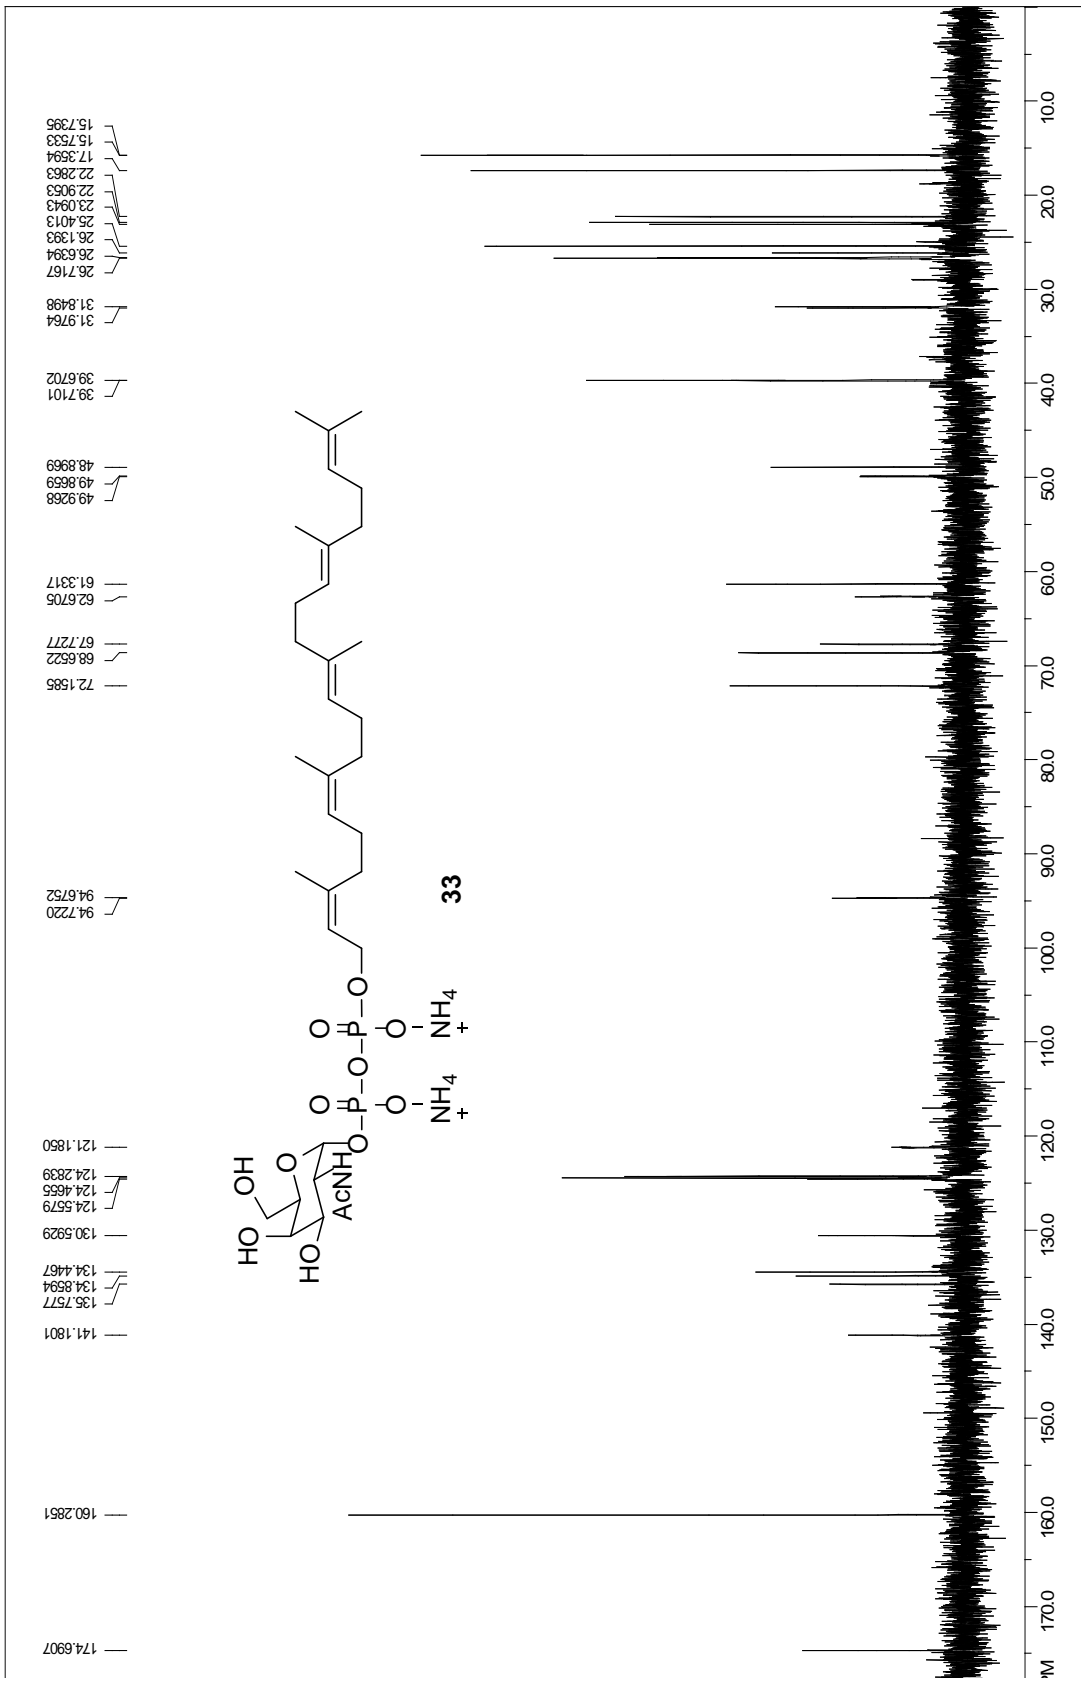

freq. of 0 ppm 125.730129 MHz  
 processed size: 32768 complex points  
 LB: 1.000 GB 0.0000

C:\Users\BMD\Desktop\Spec Data\NMR\DATA\Ram\NMR2\pns-3-47\2\fid exp: -zggp30-  
 simlar (freq.: 125.742702 MHz  
 domain size: 65536 points  
 \* 30030.03 Hz = 238.821256 ppm = 0.458222 Hz/pt  
 tot of scans: 11242

-10.3510  
-10.4872  
-13.0017  
-13.1314

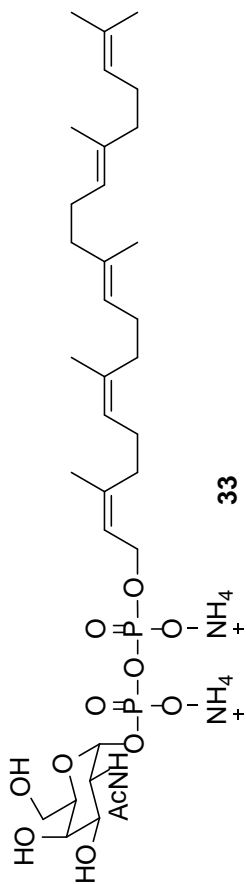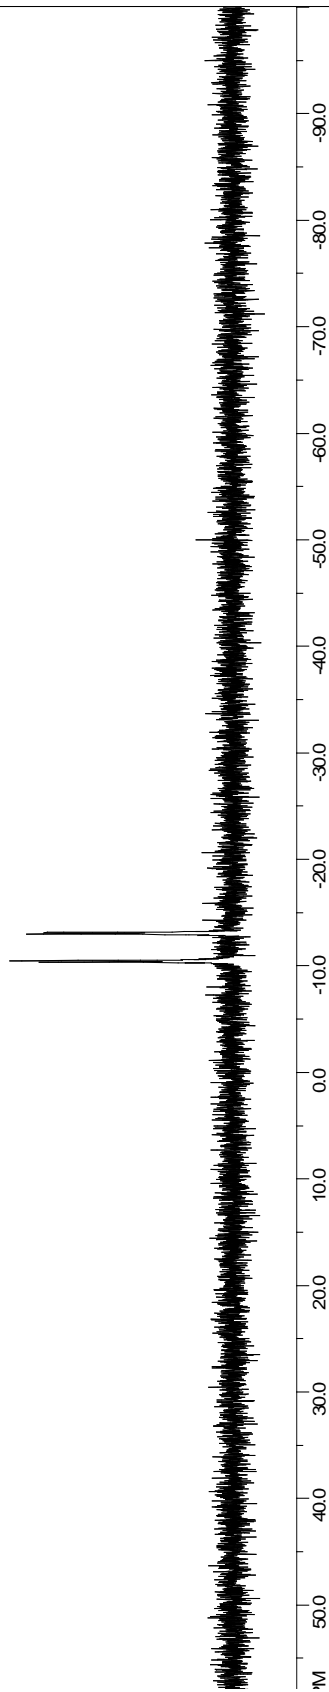

freq. of 0 ppm: 161.97573 MHz  
processed size: 32768 complex points  
LB: 0.000 GB: 0.0000

C:\Users\BWD\Desktop\Ramu\NMR\amesy\pentasaccharide\1\fid exp1 <ppp30>  
smile: freq.: 161.967474 MHz  
domain size: 65336 points  
r: 64565.06 Hz = 400.914228 ppm = 0.990650 Hz/pt  
bar of scale: 161

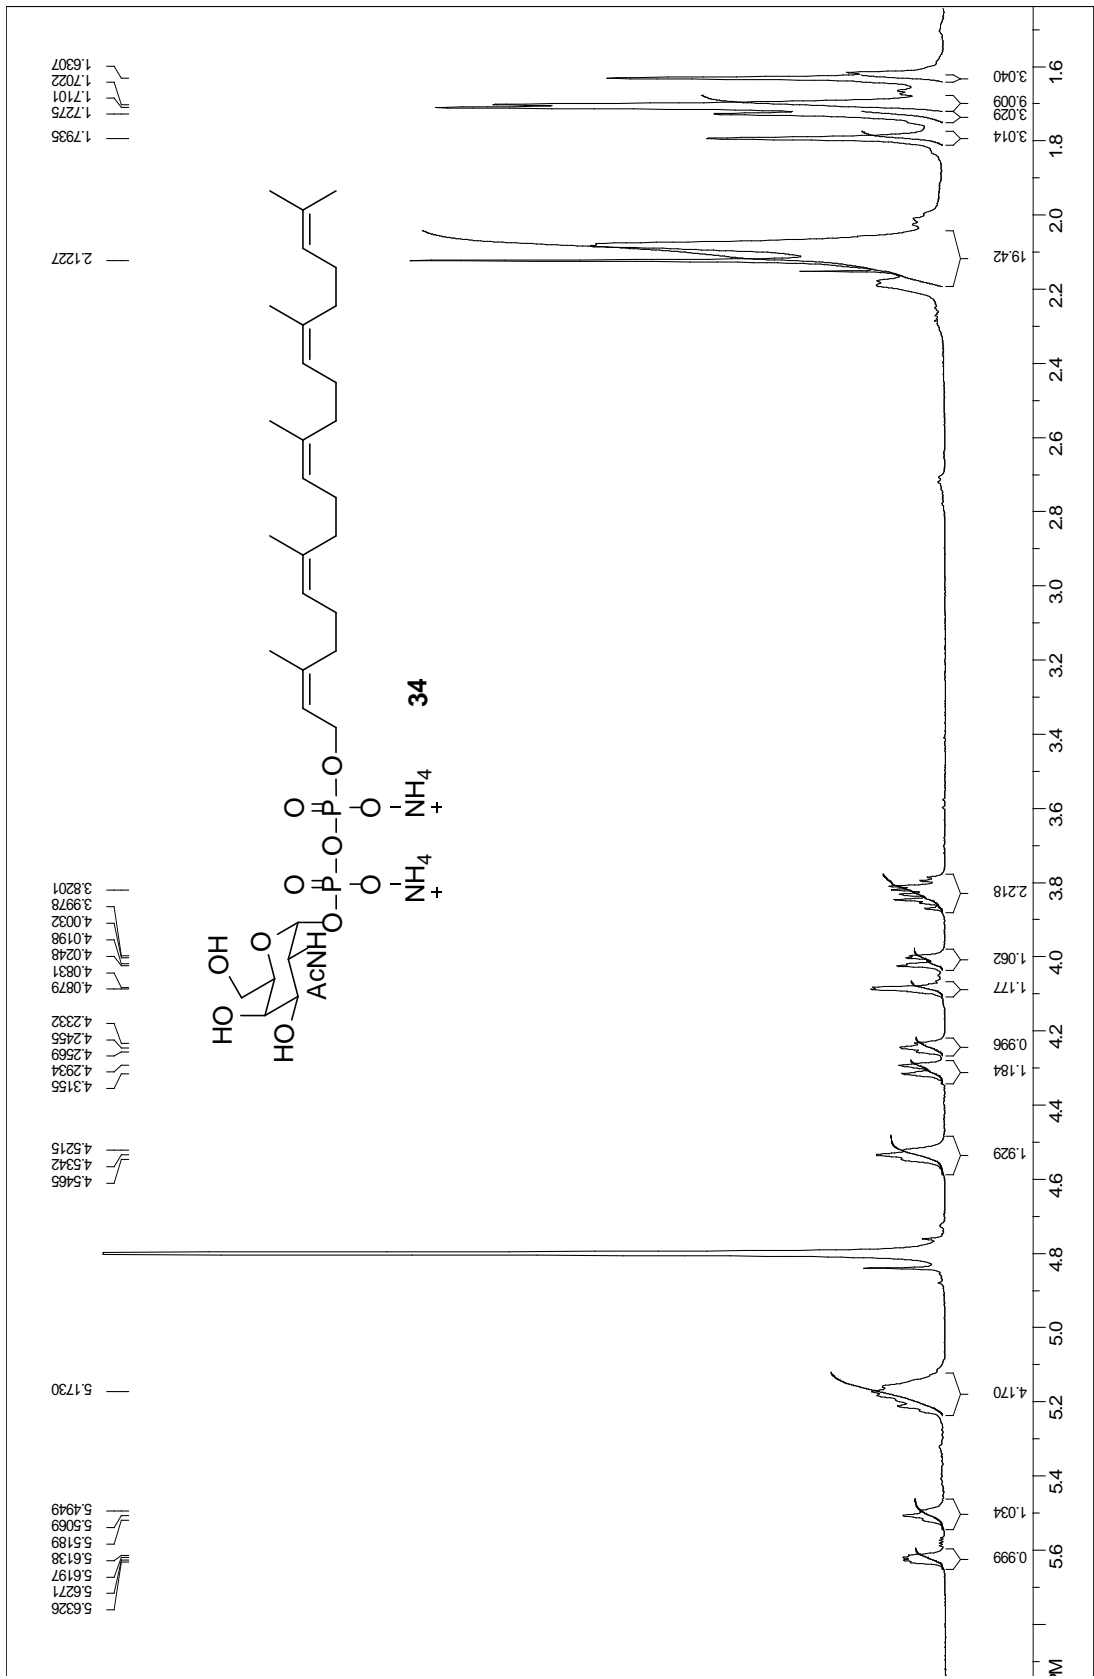

CVUsers\BWI\Desktop\Spc Data\NMR DATA\Way Project\GAINC\PP8a\PerinNew\1.fid exp1 -cg3b-  
 acqname: 500.023038 MHz  
 acqfreq: 500.023038 MHz  
 domain size: 65536 points  
 f1: 1.033038 Hz = 20.662003 ppm = 0.157632 Hz/pt  
 lb: 0.000 GB 0.0000  
 processed size: 32768 complex points  
 freq. of 0 ppm: 500.019561 MHz

15.6883  
17.3296  
22.2789  
22.9981  
23.0380  
23.1781  
23.2285  
25.4060  
25.4504  
26.2231  
26.3539  
26.5855  
31.8439  
32.0590  
32.1021

49.9018  
49.8403

61.2933  
62.7695  
67.6790  
68.6257  
72.1580

94.7986

124.3522  
124.4122  
124.8524  
125.1027  
125.2276  
134.7113  
134.7963  
135.3969  
135.4229  
141.3172

174.7238

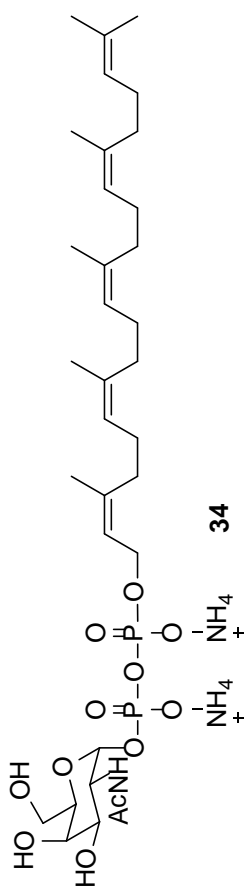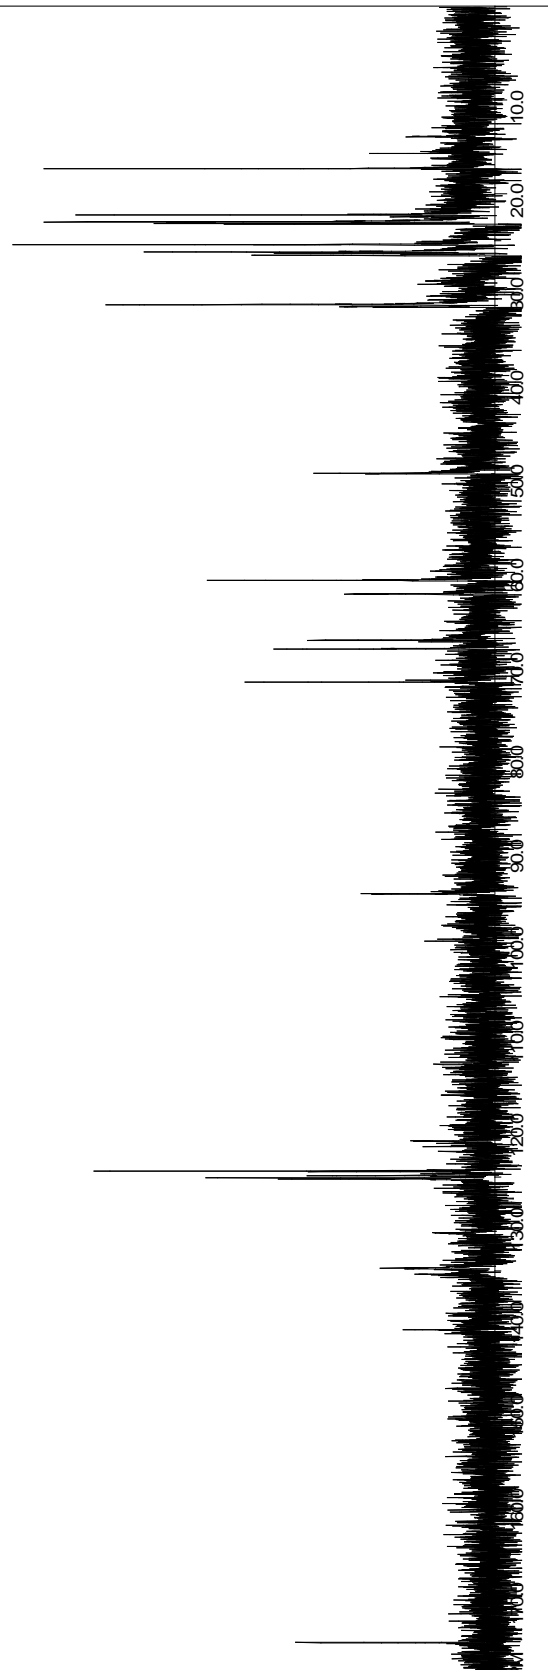

freq. of 0 ppm: 125.730125 MHz  
 125.730125 MHz  
 LB: 0.000 GB: 0.0000

C:\Users\BVD\Desktop\Spec: Data\NMR DATA\Wzy Project\GalNAc6SPePsefNew2\fid exp1 -3ppg98-  
 name: 1347963-1353969-1354229-1413172-1248524-1244122-1243522  
 h: 30000.00 Hz = 288.821256 ppm = 0.458222 Hz/tt  
 bar of scans: 15111

-10.0612  
-10.1785  
-12.1939  
-12.3245

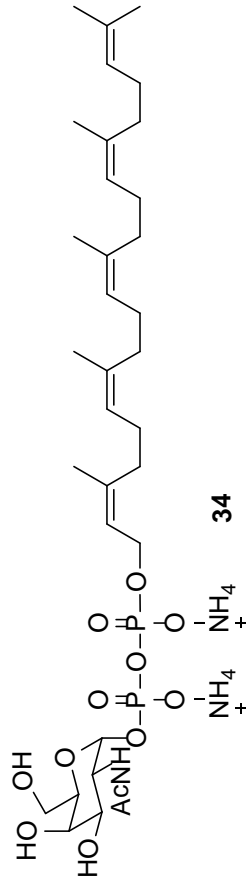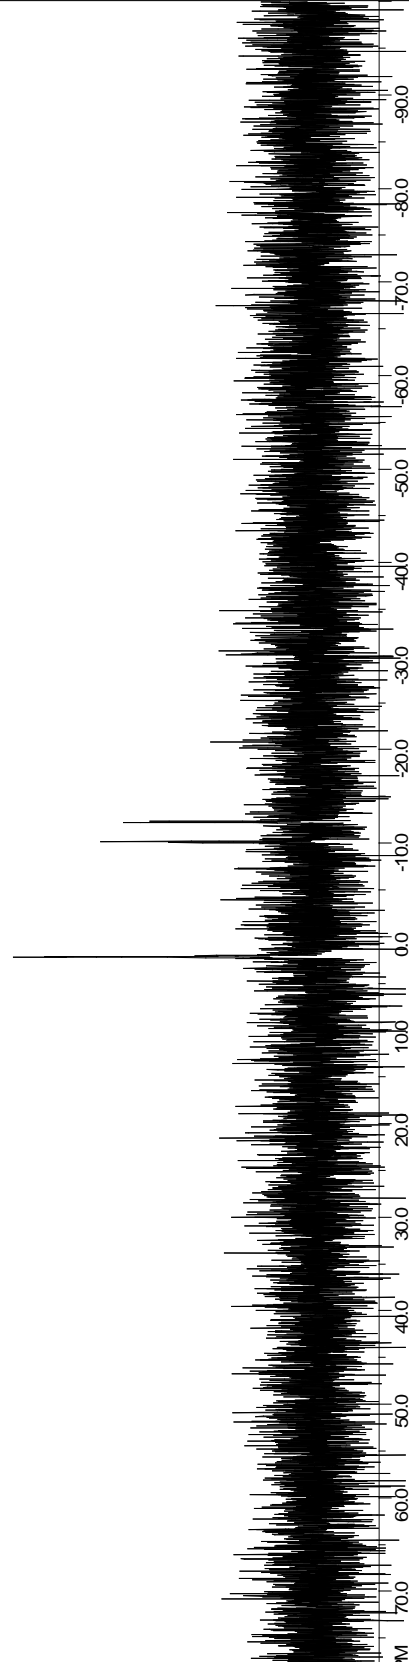

J:\Gai\Nc\FFam\Phos\1\vid exp1 <g3p3d>  
 acqfile: 1613674741.viz  
 Date\_UTC: 2011-08-11 10:00:00  
 X: 64635.00 Hz Y: 400.914228 ppm = 0.998830 Hz/pt  
 ber of scans: 246

freq. of 0 ppm: 161.375485 MHz  
 process size: 32788 complex points  
 LS: 1.00 GB 0.0000



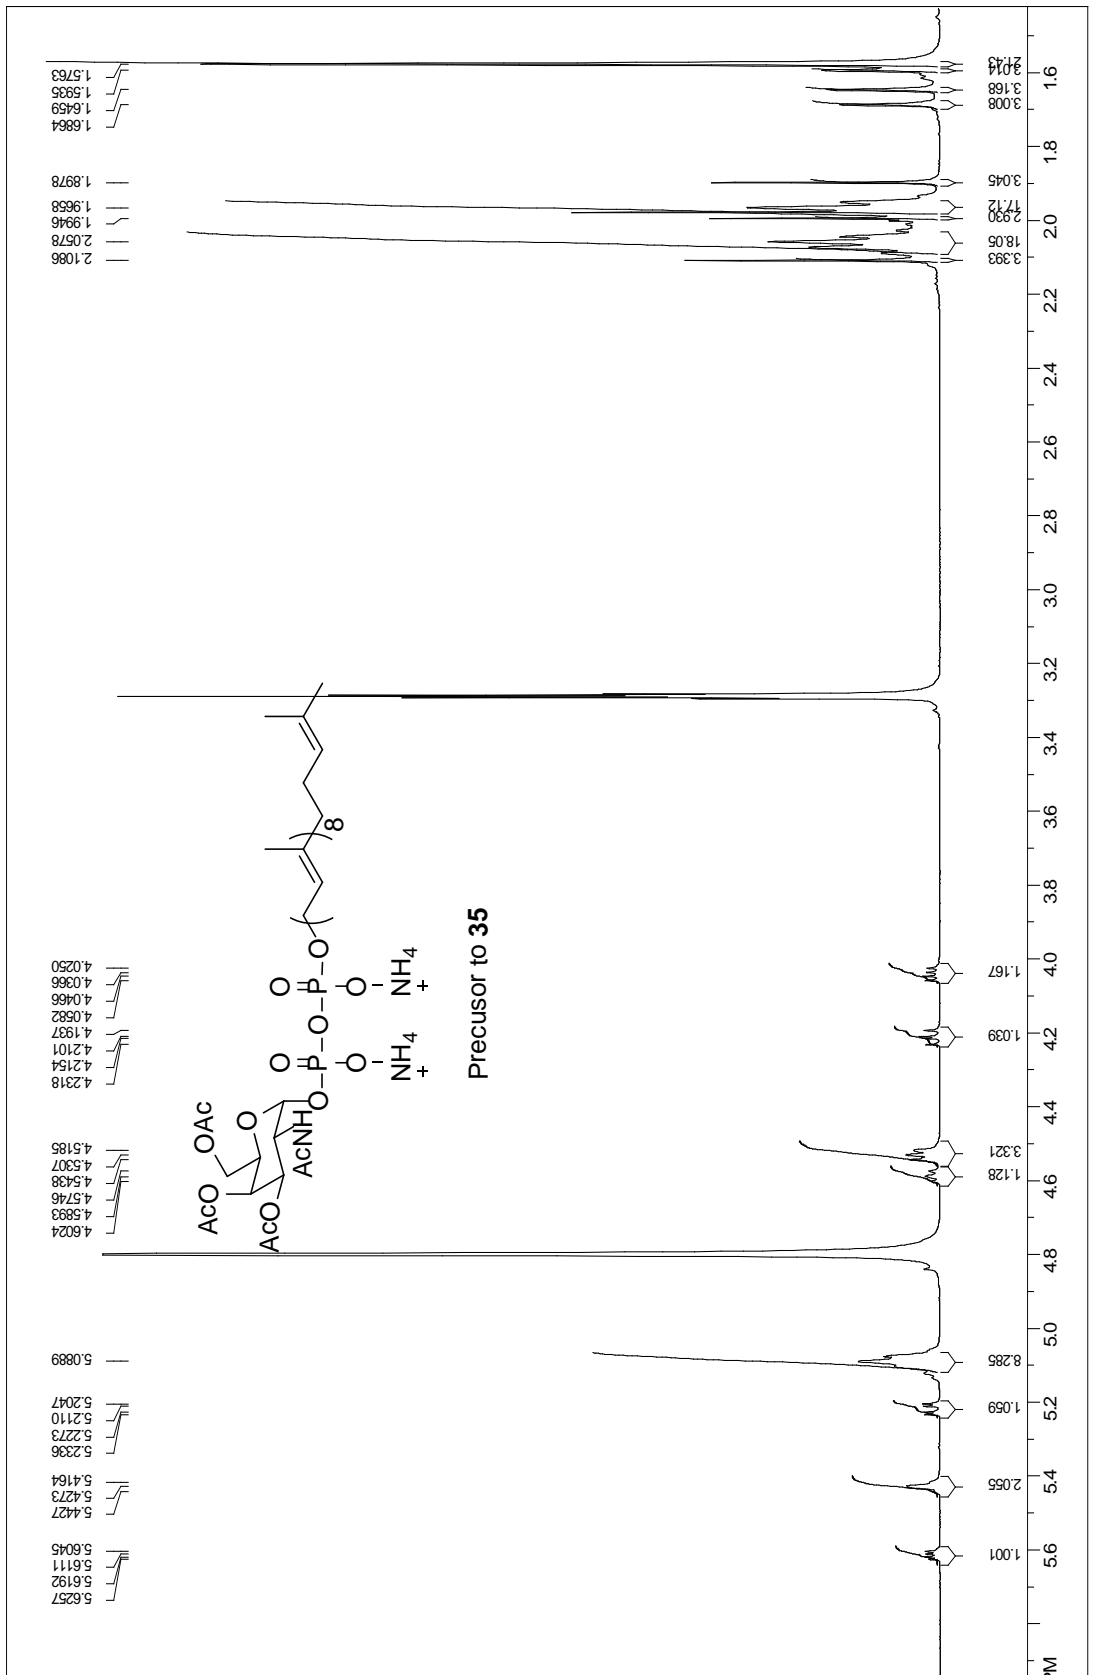

freq: 0 ppm: 500.02020 MHz  
 processed size: 32788 complex points  
 LB: 0.000 GB: 0.0000

J:\AccG\NMR\PPS\data\011\1d exp1 <g>gde</g>  
 similar freq: 500.020388 MHz  
 domain size: 65936 points  
 r: 10350.98 Hz = 20.66203 ppm = 0.15763214 pt  
 bar of scans: 64

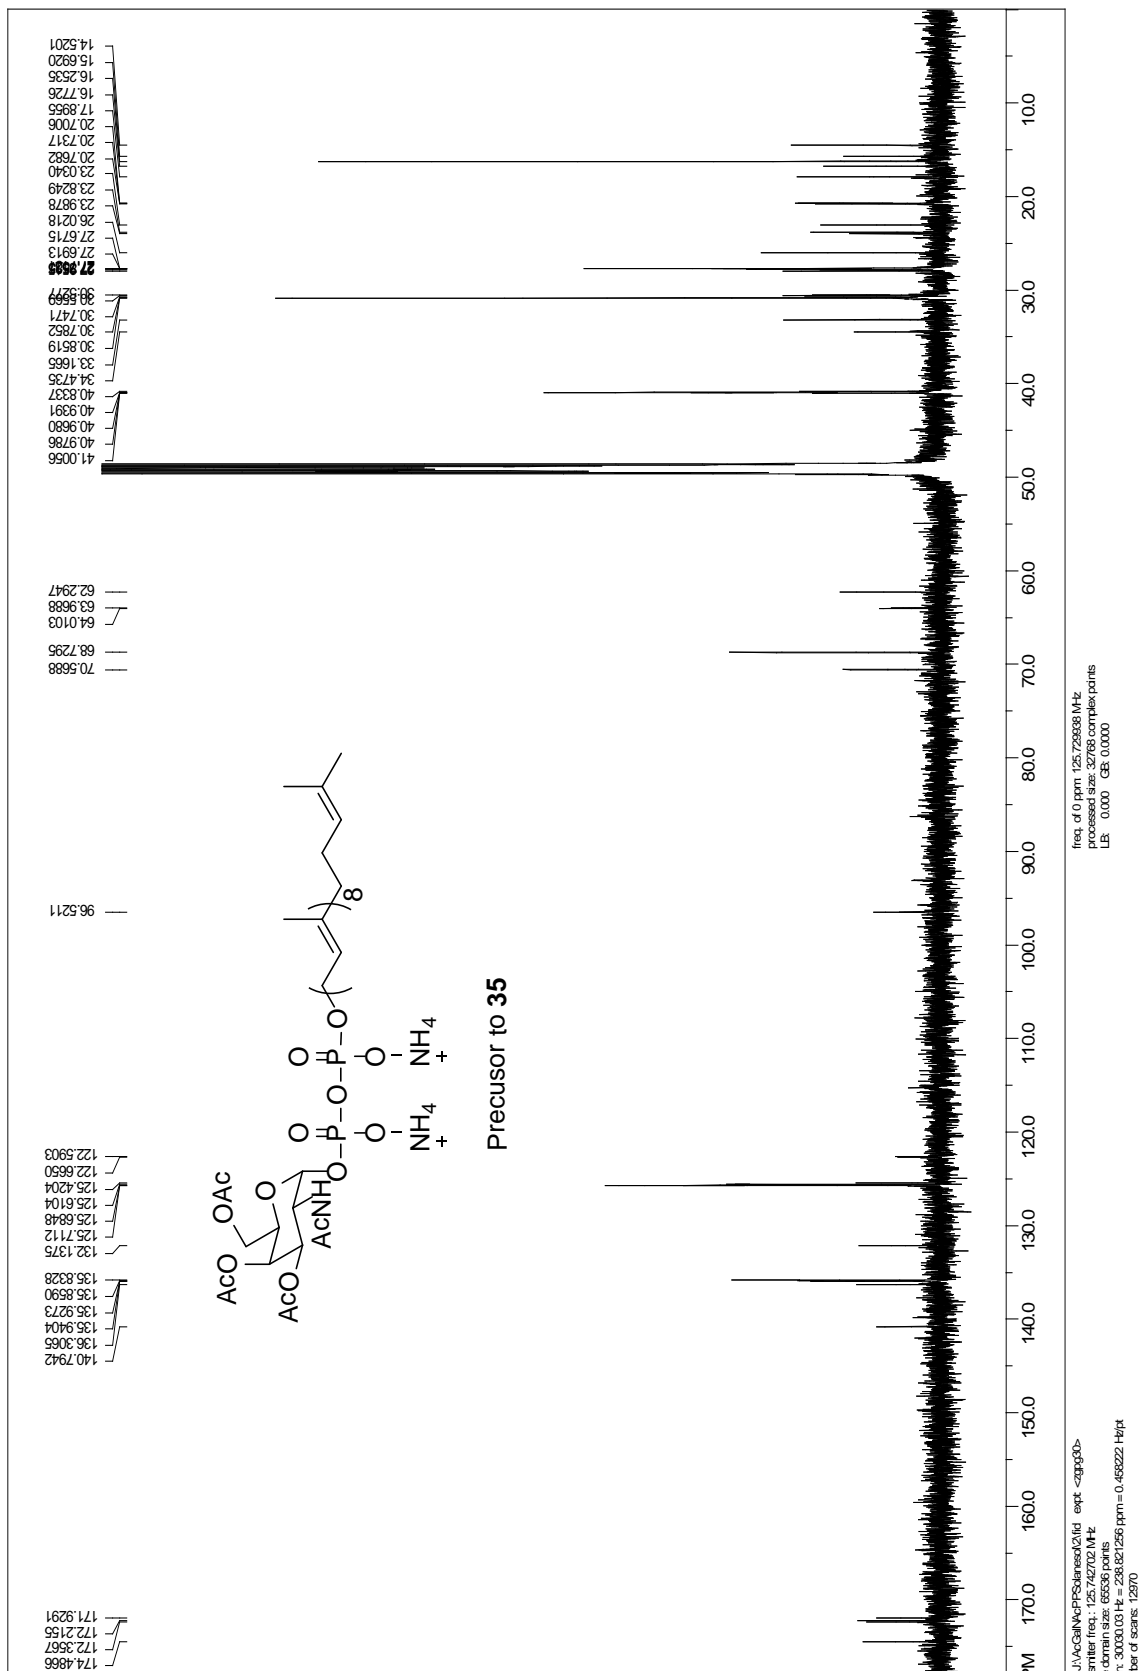

-9.5562  
-9.6994  
-12.4672  
-12.6090

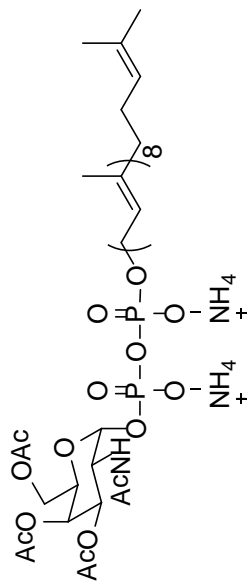

Precursor to 35

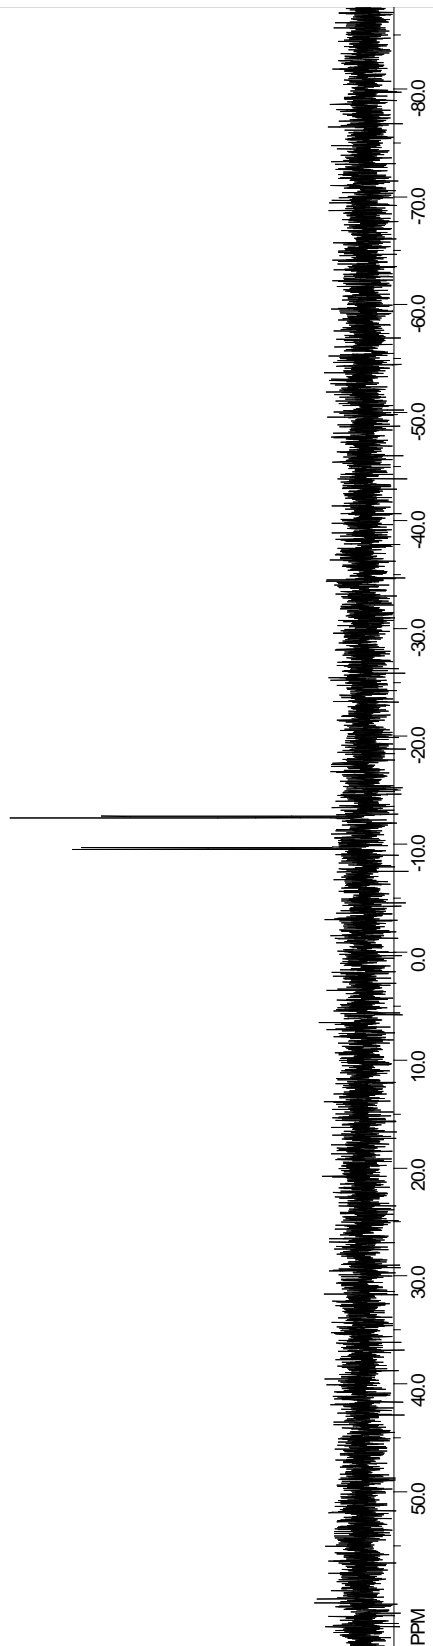

freq. of 0 ppm: 161.575460 MHz  
processed size: 32768 complex points  
LB: 1.000 GE: 0.0000

file: J:\ACSI\AcFPOden\003\fid\_ expt\_ <2>g3d>  
transmitter freq.: 161.367474 MHz  
time domain size: 65536 points  
width: 64935.06 Hz = 400.914228 ppm = 0.990030 Hz/pt  
number of scans: 211

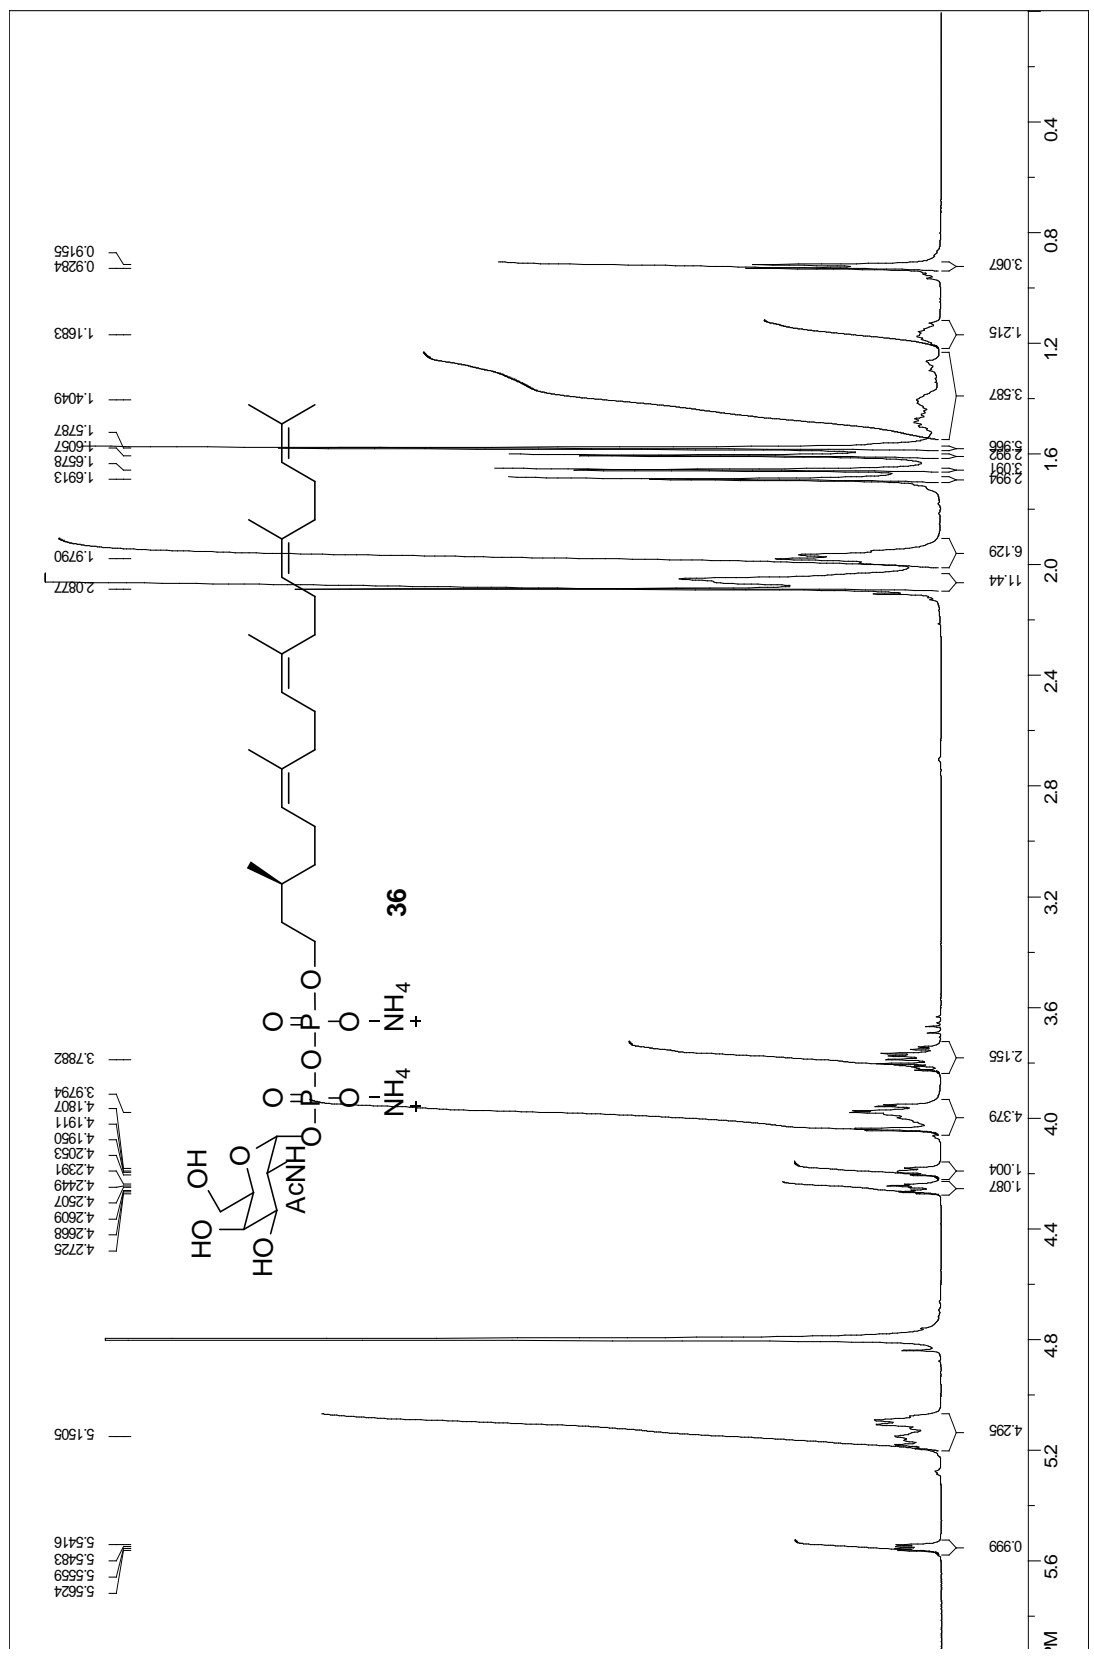

freq. of 0 ppm: 500.019850 MHz  
 processed size: 32788 complex points  
 LB: 0.300 GB: 0.0000

J:\GAIN\PM\SP\entia\1\vid exp1 <exp>  
 smiller freq.: 500.023288 MHz  
 domain size: 65536 points  
 τ: 10.030.091 Hz = 20.60203 ppm = 0.157632 Hz pt  
 bar of scans: 64

SpinWorks 2.3  
X 0.500

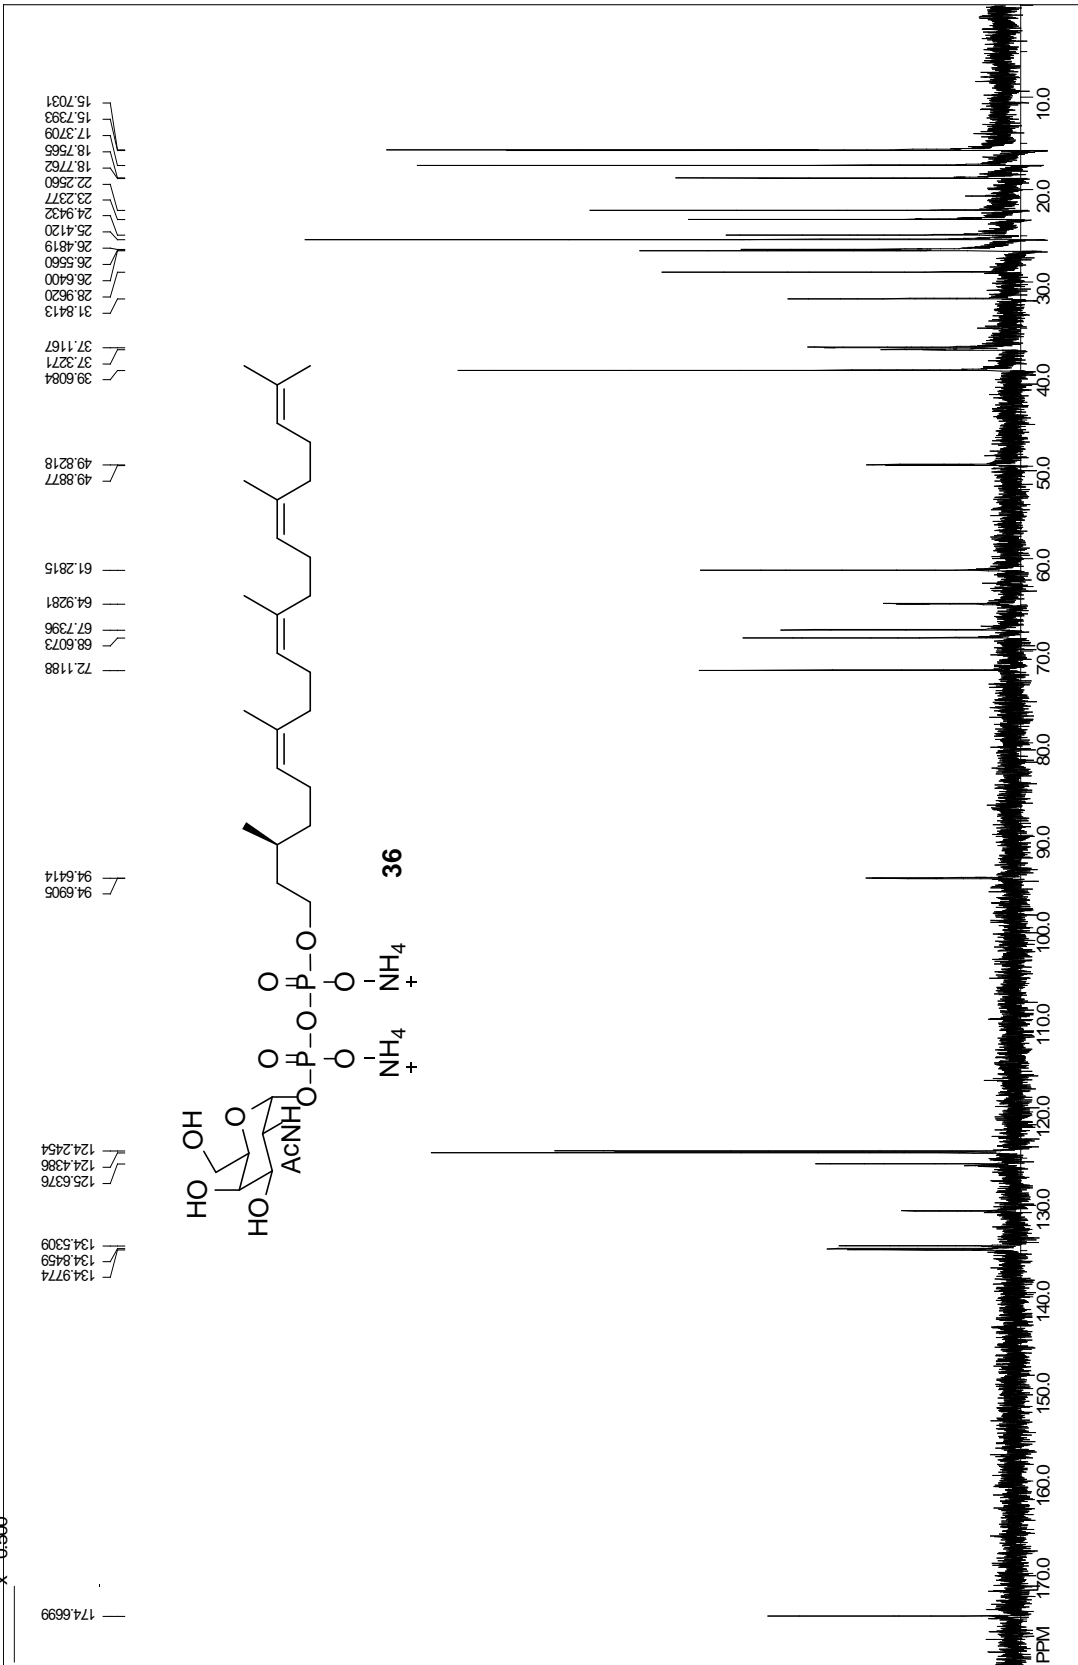

file: J:\GAIN\PPMS\Panel\2\fid\_ext\_<ggg30>  
transmitter freq.: 125.742702 MHz  
time domain size: 66536 points  
width: 30030.03 Hz = 236.821256 ppm = 0.465221 Hz/pt  
number of scans: 13338

freq. of 0 ppm: 125.730129 MHz  
processed size: 32768 complex points  
LB: 1.000 GB: 0.0000

9.8927  
10.0040  
11.7383  
11.8513

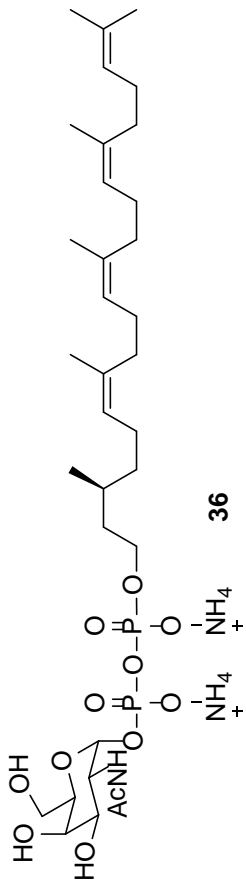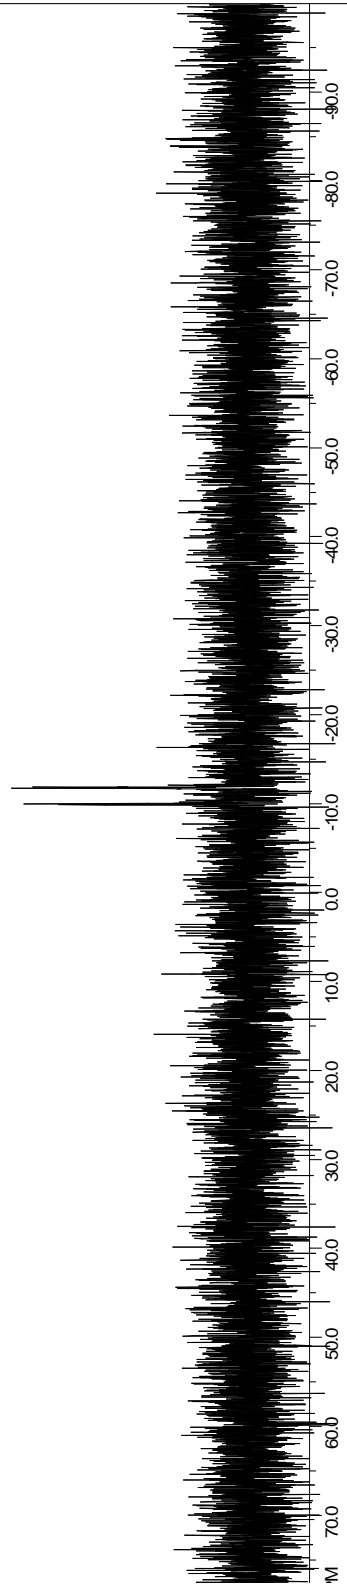

J:\GAIN\MSPeria2\fid exp - <ppp30>  
smile: freq: 161.97744 MHz  
domain size: 6536 points  
r: 64635.06 Hz = 403.94228 ppm = 0.930830 Hz/pt  
bar of scans: 58

freq: 0 ppm: 161.975460 MHz  
processed size: 32768 complex points  
LE: 0.000 GB: 0.0000
